# Supplementary material for: Response of Chironomids to Key Environmental Factors: Perspective for Biomonitoring
Source: Preprints.org preprint supplement (doi:10.20944/preprints202208.0408.v1), 2022-08-24
Supplement: Supplementary file 1 [file supplementary]

## Sheet: Foglio1
row.names	seq	habitat	staz	staz_4	staz_6	altit	dist	year	month	temp	pH	cond	O2	N-NO3	TP	N-NH4	Ablabesmyia_sstr	Acricotopus	Allopsectrocladius	Apsectrotanypus	Arctopelopia	Baeotendipes	Benthalia	Boreoheptagyia	Brillia	Buchonomyia	C_annularius_gr	C_anthracinus_gr	C_bicinctus_gr	C_festivellus_gr	C_fuscus_gr	C_plumosus_gr	C_salinarius_gr	C_thummi_gr	C_tremulus_gr	C_trifascia_gr	Camptochironomus	Caulochironomus	Chaetocladius	Chernovskiia	Chironomus_sstr	Cladopelma	Cladotanytarsus	Clinotanypus	Conchapelopia	Corynoneura	Cryptochironomus	Cryptotendipes	D_aberrata_gr
ALAAdda1	1	ALA	ALAAd	Adda_SO_laghi	CampoMoro	1967	0.2	1997	8	17	7.2	65	7.9	0.32	25	13
ALAAdda2	2	ALA	ALAAd	Adda_SO_laghi	GavialagoBianco	1600	5	1978	7	0	0	0	0	0	0	0																			11.111
ALAAdda3	3	ALA	ALAAd	Adda_SO_laghi	GavialagoBianco	1600	5	1979	8	0	0	0	0	0	0	0																																	11.111
ALAAdda4	4	ALA	ALAAd	Adda_SO_laghi	Manzina	2180	0.2	1975	8	0	0	0	0	0	0	0																														1			1
ALAAdig10	10	ALA	ALAAd	AdigeBZ	anterselva0353	1642	0.2	2009	9	0	7.595	94.7	10.005	0.204	4	0	1909.2
ALAAdig11	11	ALA	ALAAd	AdigeBZ	anterselva04.51	1642	0.2	2009	5	0	7.28	94.8	10.5	0.18	4	0
ALAAdig12	12	ALA	ALAAd	AdigeBZ	anterselva04.52	1642	0.2	2009	5	0	7.28	94.9	10.17	0.21	5	0
ALAAdig13	13	ALA	ALAAd	AdigeBZ	anterselva04.52	1642	0.2	2009	9	0	7.28	94.9	10.17	0.21	5	0	1376.4											44.4
ALAAdig14	14	ALA	ALAAd	AdigeBZ	anterselva04.53	1642	0.2	2009	5	0	7.28	94.9	10.17	0.21	5	0
ALAAdig15	15	ALA	ALAAd	AdigeBZ	anterselva04.53	1642	0.2	2009	9	0	7.28	94.9	10.17	0.21	5	0												44.4
ALAAdig16	16	ALA	ALAAd	AdigeBZ	anterselva0421	1642	0.2	2009	9	0	7.58	94.9	10.17	0.21	5	0	399.6											2930.4
ALAAdig17	17	ALA	ALAAd	AdigeBZ	anterselva25.1	1642	0.2	2009	9	0	7.065	105.95	7.675	0.2305	2.5	0
ALAAdig18	18	ALA	ALAAd	AdigeBZ	anterselva25.3	1642	0.2	2009	5	0	7.27	104.6	10.5	0.185	3	0
ALAAdig19	19	ALA	ALAAd	AdigeBZ	anterselva27.2	1642	0.2	2009	9	0	6.96	109.7	6.09	0.235	53	0
ALAAdig20	20	ALA	ALAAd	AdigeBZ	anterselva27.3	1642	0.2	2009	9	0	6.96	109.7	6.09	0.235	53	0
ALAAdig21	21	ALA	ALAAd	AdigeBZ	Coredo	1828	0.2	1996	7	10	0	50	9	0		4
ALAAdig22	22	ALA	ALAAd	AdigeBZ	PRAGSBraies1a	1489	0.2	2010	5	0	0	0	0	0	0	0					44.4444
ALAAdig23	23	ALA	ALAAd	AdigeBZ	PRAGSBraies1a	1489	0.2	2010	10	0	0	0	0	0	0	0					44.4444
ALAAdig24	24	ALA	ALAAd	AdigeBZ	PRAGSBraies1c	1489	0.2	2010	10	0	0	0	0	0	0	0					33.3333										11.1111
ALAAdig25	25	ALA	ALAAd	AdigeBZ	PRAGSBraies2a	1489	0.2	2010	5	0	0	0	0	0	0	0					44.4444
ALAAdig26	26	ALA	ALAAd	AdigeBZ	PRAGSBraies2b	1489	0.2	2010	5	0	0	0	0	0	0	0					22.2222
ALAAdig27	27	ALA	ALAAd	AdigeBZ	sValentinoallaMuta012	1498	0.2	2008	9	0	8.04	131	9.59	0.008	12	16
ALAAdig28	28	ALA	ALAAd	AdigeBZ	sValentinoallaMuta021	1498	0.2	2008	6	0	7.75	167	10.51	0.137	14	6
ALAAdig29	29	ALA	ALAAd	AdigeBZ	sValentinoallaMuta022	1498	0.2	2008	6	0	7.75	167	10.51	0.137	14	6
ALAAdig30	30	ALA	ALAAd	AdigeBZ	sValentinoallaMuta023	1498	0.2	2008	6	0	7.75	167	10.51	0.137	14	6
ALAAdig31	31	ALA	ALAAd	AdigeBZ	sValentinoallaMuta0781	1498	0.2	2008	6	0	7.68	169	10.58	0.133	17	10
ALAAdig32	32	ALA	ALAAd	AdigeBZ	sValentinoallaMuta0782	1498	0.2	2008	6	0	7.68	169	10.58	0.133	17	10
ALAAdig33	33	ALA	ALAAd	AdigeBZ	sValentinoallaMuta0783	1498	0.2	2008	6	0	7.68	169	10.58	0.133	17	10
ALAAdig34	34	ALA	ALAAd	AdigeBZ	sValentinoallaMuta0871	1498	0.2	2008	9	0	7.98	133	8.93	0.012	20	29
ALAAdig35	35	ALA	ALAAd	AdigeBZ	sValentinoallaMuta0872	1498	0.2	2008	9	0	7.98	133	8.93	0.012	20	29												254.78
ALAAdig36	36	ALA	ALAAd	AdigeBZ	sValentinoallaMuta0873	1498	0.2	2008	9	0	7.98	133	8.93	0.012	20	29												127.39
ALAAdig37	37	ALA	ALAAd	AdigeBZ	sValentinoallaMuta141	1498	0.2	2008	9	0	7.09	138	4.55	0.064	26	92
ALAAdig38	38	ALA	ALAAd	AdigeBZ	sValentinoallaMuta142	1498	0.2	2008	9	0	7.09	138	4.55	0.064	26	92												127.39
ALAAdig39	39	ALA	ALAAd	AdigeBZ	sValentinoallaMuta143	1498	0.2	2008	9	0	7.09	138	4.55	0.064	26	92
ALAAdig40	40	ALA	ALAAd	AdigeBZ	sValentinoallaMuta1481	1498	0.2	2008	6	0	7.74	170	10.49	0.133	20	11
ALAAdig41	41	ALA	ALAAd	AdigeBZ	sValentinoallaMuta1482	1498	0.2	2008	6	0	7.74	170	10.49	0.133	20	11	254.78
ALAAdig42	42	ALA	ALAAd	AdigeBZ	sValentinoallaMuta1483	1498	0.2	2008	6	0	7.74	170	10.49	0.133	20	11	127.39
ALAAdig43	43	ALA	ALAAd	Avisio_laghi	AiexI	2174.3	0.2	2000	7	12.9	6.19	11.5	0	0.1	10	20																													55.555	55.555
ALAAdig44	44	ALA	ALAAd	Avisio_laghi	AiexII	2147.3	0.2	2000	7	13.1	6.3	9.5	10	0.03	17	20																														40.111
ALAAdig45	45	ALA	ALAAd	Avisio_laghi	Antermoia	2496	0.2	2000	7	10.4	8.19	78.85	10	0.045	2.5	20																														77
ALAAdig46	46	ALA	ALAAd	Avisio_laghi	Bocche	2247	0.2	2000	7	15.1	7.2	44.4	0	0.023	6	20															22.222															363.74
ALAAdig47	47	ALA	ALAAd	Avisio_laghi	BombaselI	2197.3	0.2	2000	7	11.3	6.2	13.2	0	0.03	7	20																														16
ALAAdig48	48	ALA	ALAAd	Avisio_laghi	BombaselII	2267.8	0.2	2000	7	12.5	6.28	11.9	0	0.03	10	20																														106.055
ALAAdig49	49	ALA	ALAAd	Avisio_laghi	BombaselIII	2268.3	0.2	2000	7	12.3	6.3	11.9667	0	0.03	9.66667	20																										11.111				106
ALAAdig5	5	ALA	ALAAd	AdigeBZ	anterselva01.53	1642	0.2	2009	5	0	7.3	83.8	9.73	0.143	5	0												133.2
ALAAdig50	50	ALA	ALAAd	Avisio_laghi	Brutto	2209.7	0.2	2000	7	14.1	6.5	20.5	0	0.146667	7.66667	14																														11.111
ALAAdig51	51	ALA	ALAAd	Avisio_laghi	Brutto	2209.7	0.2	2000	8	14.1	6.5	20.5	0	0.146667	7.66667	14																														33
ALAAdig52	52	ALA	ALAAd	Avisio_laghi	Buse	2059.3	0.2	2000	7	14.3	6.48	14.1	0	0.04	14	20																														125
ALAAdig53	53	ALA	ALAAd	Avisio_laghi	Caserina	2088	0.2	2000	7	10	6.39333	23.5	0	0.253333	4	20																														77.777
ALAAdig54	54	ALA	ALAAd	Avisio_laghi	Cavallazza	2138	0.2	2000	8	14.9	7.2	18.3667	0	0.03	13.3333	20																														105.407
ALAAdig55	55	ALA	ALAAd	Avisio_laghi	Cece	1880.6	0.2	2000	7	16.8	6.66	32.2	0	0.04	7	20	22.222																													337
ALAAdig56	56	ALA	ALAAd	Avisio_laghi	Forame	2466.9	0.2	2000	7	12.9	6.585	16.15	0	0.03	13	23																														698.556
ALAAdig57	57	ALA	ALAAd	Avisio_laghi	Iuribrutto	2207.3	0.2	2000	7	16.6	7.5	45.5333	0	0.03	0.1	20												55.555																		84
ALAAdig58	58	ALA	ALAAd	Avisio_laghi	Lagoraimagg	2268	0.2	2000	7	9	6.6	19.1	0	0.126667	8.66667	12																														258
ALAAdig59	59	ALA	ALAAd	Avisio_laghi	Lagoraimagg	2268	0.2	2000	8	9	6.6	19.1	0	0.126667	8.66667	12
ALAAdig6	6	ALA	ALAAd	AdigeBZ	anterselva01.82	1642	0.2	2009	5	0	7.3	83.8	9.73	0.143	5	0	266.4											44.4
ALAAdig60	60	ALA	ALAAd	Avisio_laghi	Lagoraimin	2269	0.2	2000	7	10.6	5.66	8.4	0	0.23	6	20																														77.777
ALAAdig61	61	ALA	ALAAd	Avisio_laghi	Lagusel	2101.7	0.2	1990	7	14.6	7.66	223	0	0.03	16	65
ALAAdig62	62	ALA	ALAAd	Avisio_laghi	Lagusel	2101.7	0.2	2000	8	14.6	7.66	223	0	0.03	16	65												33.333																		167
ALAAdig63	63	ALA	ALAAd	Avisio_laghi	LusiaI	2332	0.2	2000	8	14	6.59333	40.6	0	0.03	9.33333	20																														57
ALAAdig64	64	ALA	ALAAd	Avisio_laghi	LusiaII	2352	0.2	2000	8	16.8	6.49	25.5	0	0.03	24	20																														37.0555
ALAAdig65	65	ALA	ALAAd	Avisio_laghi	LusiaIII	2380	0.2	2000	7	9.7	6.98333	37.3333	0	0.0666667	10	20																														221.055
ALAAdig66	66	ALA	ALAAd	Avisio_laghi	Moregna	2058.2	0.2	2000	8	17.5	6.65667	29.3333	0	0.11	12.5	60.5667	22.222																												66.666	36.7407
ALAAdig67	67	ALA	ALAAd	Avisio_laghi	Stellune	2099.2	0.2	2000	7	12.2	7.06333	39.2333	0	0.03	11	20																														22.5555
ALAAdig68	68	ALA	ALAAd	Avisio_laghi	Trote	2100.5	0.2	2000	8	14.6	6.98667	17.6667	0	0.065	10.5	23																														89
ALAAdig69	69	ALA	ALAAd	Fedaia	Fedaia	2053		2000	7	11.5	7.965	139.5	0	0.18	7.25	26.5												22.222																		9
ALAAdig7	7	ALA	ALAAd	AdigeBZ	anterselva011	1642	0.2	2009	9	0	7.61	94.5	9.84	0.198	3	0	1642.8											5550
ALAAdig70	70	ALA	ALAAd	Tovel	Tovel	1178	0.2	1988	8	0	8.1	230	0	0.374	8	85.02
ALAAdig71	71	ALA	ALAAd	Tovel	Tovel	1178	0.2	2007	9	0	8.1	230	0	0.374	8	85.02
ALAAdig72	72	ALA	ALAAd	Tovel	Tovel	1178	0.2	2008	9	0	8.1	230	0	0.374	8	85.02									1			2
ALAAdig73	73	ALA	ALAAd	Tovel	Tovel12m	1178	3	1998	9	8.24	7.91	188	9.1	0		0															55.555											11.111				122
ALAAdig74	74	ALA	ALAAd	Tovel	Tovel12m	1178	3	2004	9	8.24	7.91	188	9.1	0		0																			2											41
ALAAdig75	75	ALA	ALAAd	Tovel	TovelBacNEou	1178	5	1988	8	0	0	186.5	0.9	0.285	0	0
ALAAdig76	76	ALA	ALAAd	Tovel	TovelBaiaRossa	1178	0.2	2014	7	0	0	0	0	0	0	0
ALAAdig77	77	ALA	ALAAd	Tovel	TovelPM	1178	3	1988	8	16.4	7.8	203.37	9	0.374	8	27																			22.222
ALAAdig78	78	ALA	ALAAd	Tovel	TovelPM	1178	3	1990	9	16.4	7.8	203.37	9	0.374	8	27																			33.333
ALAAdig79	79	ALA	ALAAd	Tovel	TovelPM	1178	3	1996	8	16.4	7.8	203.37	9	0.374	8	27
ALAAdig8	8	ALA	ALAAd	AdigeBZ	anterselva02.51	1642	0.2	2009	5	0	7.32	85.7	10.39	0.174	4	0
ALAAdig80	80	ALA	ALAAd	Tovel	TovelPM	1178	3	2007	9	16.4	7.8	203.37	9	0.374	8	27	1																													55.555
ALAAdig9	9	ALA	ALAAd	AdigeBZ	anterselva0252	1642	0.2	2009	9	0	7.595	94.7	10.005	0.204	4	0												1420.8
ALAAust81	81	ALA	ALAAu	Austria	WeisL01	929	1	2008	6	17.4	8.1	297	9	0.0501	5	0.0087							9.6								51.2											33.6	52.8			8	4.8
ALAAust82	82	ALA	ALAAu	Austria	WeisL02	929	1	2008	6	15.7	8.6	296	9.7	0.0527	5	0	109.714														3.42857											27.4286
ALAAust83	83	ALA	ALAAu	Austria	WeisP01	929	1	2008	6	4.9	7.5	331	1	0.005	0.008	0.104																									176.839
ALAAust84	84	ALA	ALAAu	Austria	WeisP02	929	1	2008	6	4.9	7.5	342	0.1	0.005	0.014	0.266																									176.839
ALAAust85	85	ALA	ALAAu	Austria	WeisP03	929	1	2008	6	4.9	7.6	347	0.1	0.005	0.0163	0.368																									132.629
ALAAust86	86	ALA	ALAAu	Austria	WeisS01	929	1	2008	6	9.2	8.2	297	10.6	0.0462	5	0.0071	44.4444						488.889																			844.444	400
ALAAust87	87	ALA	ALAAu	Austria	WeisS02	929	1	2008	6	5.5	8.5	297	10.7	0.0281	5	0	88.8889						177.778																			555.556
ALABren88	88	ALA	ALABr	Carezza	Carezza	850	15	1979	7	0	0	0	0	0	0	0
ALADora100	100	ALA	ALADo	Gran_Paradiso	F2-CARP6-1MES-MAC	2765	0.2	2010	8	0	0		0	0		0
ALADora101	101	ALA	ALADo	Gran_Paradiso	F2-CARP6-1MGL-IGR	2765	0.2	2010	8	0	0	0	0	0	0	0
ALADora102	102	ALA	ALADo	Gran_Paradiso	F2-CARP6-2BGHI-MIC	2765	0.2	2010	8	0	0		0	0		0
ALADora103	103	ALA	ALADo	Gran_Paradiso	F2-CARP6-2BMES-MAC	2765	0.2	2010	8	0	0	0	0	0	0	0
ALADora104	104	ALA	ALADo	Gran_Paradiso	F2-CARP6-2BMGL-IGR	2765	0.2	2010	8	0	0	0	0	0	0	0
ALADora105	105	ALA	ALADo	Gran_Paradiso	F2-GAV-1DRIFT	2765	0.2	2010	7	0	0	0	0	0	0	0								33																					33
ALADora106	106	ALA	ALADo	Gran_Paradiso	F2-GAV-1GHI-MIC	2765	0.2	2010	7	0	0		0	0		0
ALADora107	107	ALA	ALADo	Gran_Paradiso	F2-GAV-1MES-MAC	2765	0.2	2010	7	0	0	0	0	0	0	0
ALADora108	108	ALA	ALADo	Gran_Paradiso	F2-GAV-1MGL-IGR	2765	0.2	2010	7	0	0		0	0		0
ALADora109	109	ALA	ALADo	Gran_Paradiso	F2-GAV-2AGHI-MIC	2765	0.2	2010	7	0	0		0	0		0																													33
ALADora110	110	ALA	ALADo	Gran_Paradiso	F2-GAV-2AMES-MAC	2765	0.2	2010	7	0	0		0	0		0
ALADora111	111	ALA	ALADo	Gran_Paradiso	F2-GAV-2AMGL-IGR	2765	0.2	2010	7	0	0	0	0	0	0	0
ALADora112	112	ALA	ALADo	Gran_Paradiso	F2-LEV-1	2765	0.2	2010	9	5.5	8.27	80	0	0		0									5
ALADora113	113	ALA	ALADo	Gran_Paradiso	F2-LEV-1MGL-IGL	2765	0.2	2010	9	0	0		0	0		0
ALADora114	114	ALA	ALADo	Gran_Paradiso	F2-LEV-2AGHI-MIC	2765	0.2	2010	9	0	0	0	0	0	0	0									33
ALADora115	115	ALA	ALADo	Gran_Paradiso	F2-LEV-2AMES-MAC	2568	0.2	2010	9	0	0		0	0		0
ALADora116	116	ALA	ALADo	Gran_Paradiso	F2-LEV-2AMGL-IGR	2656	0.2	2010	9	0	0		0	0		0									33
ALADora117	117	ALA	ALADo	Gran_Paradiso	F2-NOA-1GHI-MIC	2701	0.2	2009	8	0	0	0	0	0	0	0
ALADora118	118	ALA	ALADo	Gran_Paradiso	F2-NOA-1MES-MAC	2747	0.2	2010	9	0	0		0	0		0								33
ALADora119	119	ALA	ALADo	Gran_Paradiso	F2-NOA-2AGHI-MIC	2320	0.2	2010	9	0	0	0	0	0	0	0								33
ALADora120	120	ALA	ALADo	Gran_Paradiso	F2-NOA-2AMGL-IGR	2320	0.2	2010	9	0	0		0	0		0								33
ALADora121	121	ALA	ALADo	Gran_Paradiso	F2-RHEM-1	2671	0.2	2010	9	1.75	8.39	330	0	0		0
ALADora122	122	ALA	ALADo	Gran_Paradiso	F2-RHEM-1MES-MAC	2848	0.2	2010	9	0	0		0	0		0
ALADora123	123	ALA	ALADo	Gran_Paradiso	F2-RHEM-2A	2848	0.2	2010	7	0	0		0	0		0
ALADora124	124	ALA	ALADo	Gran_Paradiso	F2-RHEM-2AMES-MAC	2848	0.2	2010	7	0	0	0	0	0	0	0
ALADora125	125	ALA	ALADo	Gran_Paradiso	F2-RHEM-2BMGL-IGR	2765	0.2	2010	9	0	0		0	0		0
ALADora126	126	ALA	ALADo	Gran_Paradiso	F2-RO-2BMES-MAC	2765	0.2	2010	8	0	0	0	0	0	0	0
ALADora127	127	ALA	ALADo	Gran_Paradiso	F2-ROC-1	2765	0.2	2010	8	13.85	7.48		0	0		0
ALADora128	128	ALA	ALADo	Gran_Paradiso	F2-ROC-1DRIFT	2765	0.2	2010	8	0	0	0	0	0	0	0
ALADora129	129	ALA	ALADo	Gran_Paradiso	F2-ROC-1GHI-MIC	2765	0.2	2010	7	0	0	0	0	0	0	0
ALADora130	130	ALA	ALADo	Gran_Paradiso	F2-ROC-1GHI-MIC	2765	0.2	2010	8	0	0	0	0	0	0	0
ALADora131	131	ALA	ALADo	Gran_Paradiso	F2-ROC-1MES-MAC	2765	0.2	2010	7	0	0	0	0	0	0	0																													33
ALADora132	132	ALA	ALADo	Gran_Paradiso	F2-ROC-1MES-MAC	2765	0.2	2010	8	0	0	0	0	0	0	0
ALADora133	133	ALA	ALADo	Gran_Paradiso	F2-ROC-1MGL-IGR	2765	0.2	2010	8	0	0		0	0		0																													66
ALADora134	134	ALA	ALADo	Gran_Paradiso	F2-ROC-1MGL-IGRMAC	2765	0.2	2010	7	0	0	0	0	0	0	0																			33										66
ALADora135	135	ALA	ALADo	Gran_Paradiso	F2-ROC-1MIC-GHI	2765	0.2	2010	8	0	0	0	0	0	0	0																													66
ALADora136	136	ALA	ALADo	Gran_Paradiso	F2-ROC-2A	2765	0.2	2010	8	12	7.03		0	0		0																			5										108
ALADora137	137	ALA	ALADo	Gran_Paradiso	F2-ROC-2AGHI-MIC	2568	0.2	2010	7	0	0		0	0		0																													210
ALADora138	138	ALA	ALADo	Gran_Paradiso	F2-ROC-2AMES	2785	0.2	2010	7	0	0	0	0	0	0	0																													3
ALADora139	139	ALA	ALADo	Gran_Paradiso	F2-ROC-2AMES-MAC	2701	0.2	2010	8	0	0	0	0	0	0	0
ALADora140	140	ALA	ALADo	Gran_Paradiso	F2-ROC-2AMGL-IGR	2747	0.2	2010	8	0	0		0	0		0																			33										66
ALADora141	141	ALA	ALADo	Gran_Paradiso	F2-ROC-2AMGL-MAC	2320	0.2	2010	7	0	0	0	0	0	0	0																													66
ALADora142	142	ALA	ALADo	Gran_Paradiso	F2-ROC-2AMIC-GHI	2087	0.2	2010	8	0	0	0	0	0	0	0
ALADora143	143	ALA	ALADo	Gran_Paradiso	F2-ROC-2ASO	2087	0.2	2010	7	0	0		0	0		0																													66
ALADora144	144	ALA	ALADo	Gran_Paradiso	F2-ROC-2ASO	2087	0.2	2010	8	0	0		0	0		0
ALADora145	145	ALA	ALADo	Gran_Paradiso	F2-ROC-2ASO	2087	0.2	2010	9	0	0		0	0		0																													6
ALADora146	146	ALA	ALADo	Gran_Paradiso	F2-ROC-2B	2087	0.2	2010	7	11.5	7.68	0	0	0	0	0																			33
ALADora147	147	ALA	ALADo	Gran_Paradiso	F2-ROC-2BDRIFT	2100	0.2	2010	7	0	0		0	0		0																													33
ALADora148	148	ALA	ALADo	Gran_Paradiso	F2-ROC-2BDRIFT	2100	0.2	2010	8	0	0		0	0		0
ALADora149	149	ALA	ALADo	Gran_Paradiso	F2-ROC-2BGHI-MIC	2100	0.2	2010	8	0	0		0	0		0
ALADora150	150	ALA	ALADo	Gran_Paradiso	F2-ROC-2BMAC-MGL	2100	0.2	2010	7	0	0		0	0		0
ALADora151	151	ALA	ALADo	Gran_Paradiso	F2-ROC-2BMES-MAC	2100	0.2	2010	7	0	0		0	0		0																													3
ALADora152	152	ALA	ALADo	Gran_Paradiso	F2-ROC-2BMES-MAC	2100	0.2	2010	8	0	0		0	0		0									33																				5
ALADora153	153	ALA	ALADo	Gran_Paradiso	F2-ROC-2BMGL-IGR	2063	0.2	2010	8	0	0		0	0		0																			10
ALADora154	154	ALA	ALADo	Gran_Paradiso	F2-ROC-2BMIC	2063	0.2	2010	7	0	0		0	0		0
ALADora155	155	ALA	ALADo	Gran_Paradiso	F2-TRUC-1GHI-MIC	2063	0.2	2010	8	0	0	0	0	0	0	0
ALADora156	156	ALA	ALADo	Gran_Paradiso	F2-TRUC-1MES-MAC	2100	0.2	2010	8	0	0	0	0	0	0	0
ALADora157	157	ALA	ALADo	Gran_Paradiso	F2-TRUC-2AGHI-MIC	2100	0.2	2010	8	0	0		0	0		0
ALADora158	158	ALA	ALADo	Gran_Paradiso	F2-TRUC-2BGHI-MIC	2100	0.2	2010	8	0	0	0	0	0	0	0
ALADora159	159	ALA	ALADo	Gran_Paradiso	F2-TRUC-2BMES-MAC	2100	0.2	2010	8	0	0		0	0		0									33
ALADora160	160	ALA	ALADo	Gran_Paradiso	F2-TRUC-2BMGL-IGR	2100	0.2	2010	8	0	0		0	0		0
ALADora161	161	ALA	ALADo	Gran_Paradiso	GELATOPNGP	2848	0.2	2009	7	0	0	0	0	0	0	0
ALADora162	162	ALA	ALADo	Gran_Paradiso	GELATOPNGP	2848	0.2	2009	9	0	0	0	0	0	0	0
ALADora163	163	ALA	ALADo	Gran_Paradiso	LADJET	2747	0.2	2009	7	1.46	6.53	13.7	0	0.17	3	23
ALADora164	164	ALA	ALADo	Gran_Paradiso	LEITA	2701	0.2	1991	7	13.01	8.06	121.4	0	0.193	3	9
ALADora165	165	ALA	ALADo	Gran_Paradiso	LEITA	2701	0.2	2009	8	13.01	8.06	121.4	0	0.193	3	9
ALADora166	166	ALA	ALADo	Gran_Paradiso	LEYNIR	2747	0.2	2009	7	12.24	7.75	121.4	0	0.21	4	9																														11.11
ALADora167	167	ALA	ALADo	Gran_Paradiso	LEYNIR	2747	0.2	2009	8	12.24	7.75	121.4	0	0.21	4	9
ALADora168	168	ALA	ALADo	Gran_Paradiso	LILLET	2765	0.2	2009	7	5.14	7.1	44	0	0.243	4	6
ALADora169	169	ALA	ALADo	Gran_Paradiso	LILLET	2765	0.2	2009	8	5.14	7.1	44	0	0.243	4	6
ALADora170	170	ALA	ALADo	Gran_Paradiso	LOSERE	2568	0.2	2009	7	16.46	6.76	17.2	0	0.051	4	23
ALADora171	171	ALA	ALADo	Gran_Paradiso	LOSERE	2568	0.2	2009	8	16.46	6.76	17.2	0	0.051	4	23																														66.66
ALADora172	172	ALA	ALADo	Gran_Paradiso	LOUGIO	2320	0.2	2009	8	14.13	5.93	6.8	0	0.163	5	54
ALADora173	173	ALA	ALADo	Gran_Paradiso	MOTTA	2656	0.2	2009	7	9.79	6.81	15.8	0	0.266	4	14
ALADora174	174	ALA	ALADo	Gran_Paradiso	NEROEUGIO	2063	0.2	2009	7	12.03	6.64	13	0	0.259	4	12
ALADora175	175	ALA	ALADo	Gran_Paradiso	NEROEUGIO	2063	0.2	2009	8	12.03	6.64	13	0	0.259	4	12
ALADora176	176	ALA	ALADo	Gran_Paradiso	NIVOLETINF	2526	0.2	2009	8	14.53	7.04	81.8	0	0.113	10	190
ALADora177	177	ALA	ALADo	Gran_Paradiso	NIVOLETSUP	2538	0.2	2009	7	13.76	6.45	25.3	0	0.067	20	126
ALADora178	178	ALA	ALADo	Gran_Paradiso	NIVOLETSUP	2538	0.2	2009	8	13.76	6.45	25.3	0	0.067	20	126																														11.11
ALADora179	179	ALA	ALADo	Gran_Paradiso	Pila	570	0.2	2015	3	0	0		0	0		0
ALADora180	180	ALA	ALADo	Gran_Paradiso	ROSSET	2703	0.2	2009	7	13.86	7.42	91.7	0	0.054	5	11
ALADora181	181	ALA	ALADo	Gran_Paradiso	ROSSET	2703	0.2	2009	8	13.86	7.42	91.7	0	0.054	5	11																														22.22
ALADora182	182	ALA	ALADo	Gran_Paradiso	TREBECCHIINF	2723	0.2	2009	7	14.78	7.68	97.8	0	0.064	3	29																														22.22
ALADora183	183	ALA	ALADo	Gran_Paradiso	TREBECCHIINF	2723	0.2	2009	8	14.78	7.68	97.8	0	0.064	3	29
ALADora184	184	ALA	ALADo	Gran_Paradiso	TREBECCHISUP	2729	0.2	2009	8	15.08	7.83	104.3	0	0.063	5	25
ALADora185	185	ALA	ALADo	Lys	Vargno	1828	0.2	1987	6	13	6.55	28	9.3	0	0	0																													20
ALADora186	186	ALA	ALADo	Lys	Vargno	1828	0.2	1987	7	13	6.55	28	9.3	0	0	0
ALADora89	89	ALA	ALADo	Dora_Veny	Combal	1800	5.5	1995	7	21.7	7.9	172	9	0.098	7	300															11.111
ALADora90	90	ALA	ALADo	Dora_Veny	Combal	1800	5.5	1995	9	21.7	7.9	172	9	0.098	7	300
ALADora91	91	ALA	ALADo	Dora_Veny	Combal	1800	5.5	2016	8	21.7	7.9	172	9	0.098	7	300
ALADora92	92	ALA	ALADo	Gran_Paradiso	DJOUAN	2515	0.2	2009	3	16.87	8.54	142.2	0	0.07	6	45
ALADora93	93	ALA	ALADo	Gran_Paradiso	DRES	2087	0.2	2009	6	9.48	6.78	28.7	0	0.219	7	8
ALADora94	94	ALA	ALADo	Gran_Paradiso	DRES	2087	0.2	2009	9	9.48	6.78	28.7	0	0.219	7	8					11.11
ALADora95	95	ALA	ALADo	Gran_Paradiso	F2-CAR-2CGHI-MIC	2765	0.2	2010	8	0	0		0	0		0
ALADora96	96	ALA	ALADo	Gran_Paradiso	F2-CAR-2CMES-MAC	2765	0.2	2010	8	0	0		0	0		0
ALADora97	97	ALA	ALADo	Gran_Paradiso	F2-CAR-2CMGL-IGR	2765	0.2	2010	8	0	0	0	0	0	0	0
ALADora98	98	ALA	ALADo	Gran_Paradiso	F2-CARP6-1	2765	0.2	2010	8	5.55	7.67	0	0	0	0	0
ALADora99	99	ALA	ALADo	Gran_Paradiso	F2-CARP6-1GHI-MIC	2765	0.2	2010	8	0	0	0	0	0	0	0
ALAOgli187	187	ALA	ALAOg	AltoOglio_Dezzo	GlenoDiga	1531	0.5	2004	7	10	7	429	9	0.86	10.3	4																			1
ALAOgli188	188	ALA	ALAOg	AltoOglio_Dezzo	GlenoDiga	1531	0.5	2013	7	10	7	429	9	0.86	10.3	4
ALASarc189	189	ALA	ALASa	Sarca_laghi	ARTU	2166	0.2	1996	3	9.5	6.2	13	9	0.22533	9	10.33
ALASarc190	190	ALA	ALASa	Sarca_laghi	ARTU	2166	0.2	1996	8	9.5	6.2	13	9	0.22533	9	10.33
ALASarc191	191	ALA	ALASa	Sarca_laghi	GELA	2388	0.2	1996	7	9.72	6.57	14.2	0	0.287	4	14
ALASarc192	192	ALA	ALASa	Sarca_laghi	GHIA	2571	0.2	1996	8	11.1	6.4	8	8.1	0.211	3	40																														17
ALASarc193	193	ALA	ALASa	Sarca_laghi	LAMB	2327	0.2	1996	7	6	5.6	9	9.8	0.315	4	25.2
ALASarc194	194	ALA	ALASa	Sarca_laghi	LAMB	2327	0.2	1996	8	6	5.6	9	9.8	0.315	4	25.2																														17
ALASarc195	195	ALA	ALASa	Sarca_laghi	MAND	2399	0.2	1996	8	10.8	6.6	12.75	7.8	0.21375	2	16																			77.777										55.555
ALASarc196	196	ALA	ALASa	Sarca_laghi	NERC	2233	0.2	1996	7	8.2	5.8	8.33	6.8	0.06433	7	102.2
ALASarc197	197	ALA	ALASa	Sarca_laghi	NERC	2233	0.2	1996	8	8.2	5.8	8.33	6.8	0.06433	7	102.2
ALASarc198	198	ALA	ALASa	Sarca_laghi	NUOV	2202	0.2	1996	8	2.4	0	4	0	0.083	87	0.1
ALASarc199	199	ALA	ALASa	Sarca_laghi	RITO	2058	0.2	1996	6	7.1	6.6	17.57	8.2	0.224	4	10	33.333			33.333																										18
ALASarc200	200	ALA	ALASa	Sarca_laghi	RITO	2058	0.2	1996	8	7.1	6.6	17.57	8.2	0.224	4	10	33.333			55.555											74															18
ALASarc201	201	ALA	ALASa	Sarca_laghi	ScuroMalghette	2160	0.2	1996	8	7.6	5.9	13.6	9.1	0.275	4	9.33	55.555														34															28
ALASarc202	202	ALA	ALASa	Sarca_laghi	SERO	2379	0.2	1996	7	5.8	6	10.71	9.6	0.17886	4	15.29																														11.111
ALASarc203	203	ALA	ALASa	Sarca_laghi	SERO	2379	0.2	1996	8	5.8	6	10.71	9.6	0.17886	4	15.29																														11.111
ALASarc204	204	ALA	ALASa	Sarca_laghi	SGIUinout	1935	0.2	1996	7	15.9	6.3	21.33	7.7	0.141	8	18.67	25.8887																									11.111	6.0555			86
ALASarc205	205	ALA	ALASa	Sarca_laghi	SGIUinout	1935	0.2	1996	8	15.9	6.3	21.33	7.7	0.141	8	18.67	11.111														174											11.111	11.111			86
ALASarc206	206	ALA	ALASa	Sarca_laghi	SMANa	2663	0.2	1996	9	0	0	0	0	0	0	0
ALASarc207	207	ALA	ALASa	Sarca_laghi	TLSE	2271	0.2	1996	7	8	6.3	12	0	0.159	4	10
ALASarc208	208	ALA	ALASa	Sarca_laghi	TLTR	2282	0.2	1996	7	9	6.4	12	0	0.176	8	10
ALASarc209	209	ALA	ALASa	Sarca_laghi	TreLaghiPrincipale	2256	0.2	1996	3	7.6	6.4	12.76	10.1	0.06	4	10																														22.222
ALASarc210	210	ALA	ALASa	Sarca_laghi	TreLaghiPrincipale	2256	0.2	1996	8	7.6	6.4	12.76	10.1	0.06	4	10															14															22.222
ALASwit211	211	ALA	ALASw	Joux	Joux01	1004		2002	6	0	0	0	0	0	0	0
ALASwit212	212	ALA	ALASw	Joux	Joux01	1004		2002	9	0	0	0	0	0	0	0
ALASwit213	213	ALA	ALASw	Joux	Joux01	1004		2004	6	0	0	0	0	0	0	0
ALASwit214	214	ALA	ALASw	Joux	Joux01	1004		2004	9	0	0	0	0	0	0	0
ALASwit215	215	ALA	ALASw	Joux	Joux01	1004		2006	5	0	0	0	0	0	0	0																625
ALASwit216	216	ALA	ALASw	Joux	Joux01	1004		2006	7	0	0	0	0	0	0	0
ALASwit217	217	ALA	ALASw	Joux	Joux01	1004		2006	10	0	0	0	0	0	0	0
ALASwit218	218	ALA	ALASw	Switzerland_CH	CH_Switzerland_Immez	1000		2007	7	0	0	0	0	0	0	0
ALATici219	219	ALA	ALATi	TicinoCH	Cristallina	2398	0.01	1994	9	1.5	5.35	8	9	0.22	1	5																														47
ALATici220	220	ALA	ALATi	TicinoCH	Laghettoinf	2074	0.2	1991	8	0	0	0	0	0	0	0
ALATici221	221	ALA	ALATi	TicinoCH	Laghettoinf	2074	0.2	2007	7	0	0	0	0	0	0	0																														5
ALATici222	222	ALA	ALATi	TicinoCH	Laghettoinf	2074	0.2	2007	9	0	0	0	0	0	0	0																														4
ALATici223	223	ALA	ALATi	TicinoCH	Laghettoinfemissario	2074	0	1991	8	8.9	6.24	10.1	0	0.356	2	0.016															2															6
ALATici224	224	ALA	ALATi	TicinoCH	Laghettoinfemissario	2074	0	2007	7	8.9	6.24	10.1	0	0.356	2	0.016																														112.667
ALATici225	225	ALA	ALATi	TicinoCH	Laghettoinfemissario	2074	0	2007	9	8.9	6.24	10.1	0	0.356	2	0.016				5																										445
ALATici226	226	ALA	ALATi	TicinoCH	Laghettoinflitorale	2074	0.2	2007	7	8.9	6.24	10.1	0	0.356	2	0.016																														31
ALATici227	227	ALA	ALATi	TicinoCH	Laghettoinflitorale	2074	0.2	2007	9	8.9	6.24	10.1	0	0.356	2	0.016																														272
ALATici228	228	ALA	ALATi	TicinoCH	Laghettoinfmassi	2074	0.2	1991	8	8.9	6.24	10.1	0	0.356	2	0.016																														98
ALATici229	229	ALA	ALATi	TicinoCH	Laghettoinfsassierbasabbia	2074	0.2	1991	8	8.9	6.24	10.1	0	0.356	2	0.016																														55.555
ALATici230	230	ALA	ALATi	TicinoCH	Laghettosup	2128	0.2	2007	7	0	0	0	0	0	0	0																														9
ALATici231	231	ALA	ALATi	TicinoCH	Laghettosup	2128	0.2	2007	9	0	0	0	0	0	0	0																														50
ALATici232	232	ALA	ALATi	TicinoCH	Laghettosuplitorale	2128	0.2	2007	7	9.1	6.09	8.78	0	0.324	2	0.019																														29
ALATici233	233	ALA	ALATi	TicinoCH	Laghettosuplitorale	2128	0.2	2007	9	9.1	6.09	8.78	0	0.324	2	0.019																														465
ALATici234	234	ALA	ALATi	TicinoCH	Laghettosupmassi	2128	0.2	1991	8	9.1	6.09	8.78	0	0.324	2	0.019																														352
ALATici235	235	ALA	ALATi	TicinoCH	Laghettosupsabbiaerba	2128	0.2	1991	8	9.1	6.09	8.78	0	0.324	2	0.019																														22
ALATici236	236	ALA	ALATi	TicinoCH	Laiozza	2365	0.013	1991	9	12.5	6.07	9	9	0.14	4	18				12																										1328
ALATici237	237	ALA	ALATi	TicinoCH	Matorgno	2450	0.022	1993	8	9	6.64	10.6	0	0.191	3	18				22.222																										302
ALATici238	238	ALA	ALATi	TicinoCH	MuinoInf	1881	0.002	1992	6	12	6.04	12.2	9	0.384	0	20									11.111																					63
ALATici239	239	ALA	ALATi	TicinoCH	MuinoSup	1970	0.002	1992	6	3	5.48	11	9	0.411	2	31																														94
ALATici240	240	ALA	ALATi	TicinoCH	PiccoloNaret	2348	0.02	1994	9	3.5	6.88	14.7	9	0.179	2	1000																														433
ALATici241	241	ALA	ALATi	TicinoCH	Zota	2229	0.012	1991	9	12.5	5.75	8.7	9	0.284	2	11				11.111																										147
ALATici242	242	ALA	ALATi	Toce_laghialpini	Bodeninf	2334	0.05	1979	8	10	7.87	57	8.9	0.17	5	13
ALATici243	243	ALA	ALATi	Toce_laghialpini	Bodeninf	2334	0.05	1994	9	10	7.87	57	8.9	0.17	5	13																														459
ALATici244	244	ALA	ALATi	Toce_laghialpini	Bodensup	2343	0.03	1994	9	5.5	7.7	45	9	0.279	7	12																														18
ALATici245	245	ALA	ALATi	Toce_laghialpini	CampoIV	2279	0.007	2000	10	5.2	7.47	492	9	0.228	5	66				33.333																										57
ALATici246	246	ALA	ALATi	Toce_laghialpini	Capezzone	2100	0.009	2000	9	8.5	6.77	30	9	0.304	4	20				66.666
ALATici247	247	ALA	ALATi	Toce_laghialpini	Geccio	2109	0.01	2000	9	8.5	6.62	18.7	9	0.495	3	4																														33.333
ALATici248	248	ALA	ALATi	Toce_laghialpini	GrandeAnzasca	2269	0.007	2000	10	6.4	5.76	8.2	9	0.215	1	1																														10
ALATici249	249	ALA	ALATi	Toce_laghialpini	Marmo	1988	0.002	2000	9	10	6.6	32.7	9	0.554	2	1																														22
ALATici250	250	ALA	ALATi	Toce_laghialpini	Matogno	2087	0.03	2000	9	11.7	6.64	89.2	9	0.362	6	28
ALATici251	251	ALA	ALATi	Toce_laghialpini	MorT1R1	1814		2011	6	0	0	0	0	0	0	0																														19.5621
ALATici252	252	ALA	ALATi	Toce_laghialpini	MorT1R1	1814		2011	9	0	0	0	0	0	0	0
ALATici253	253	ALA	ALATi	Toce_laghialpini	MorT1R2	1814		2011	6	0	0	0	0	0	0	0
ALATici254	254	ALA	ALATi	Toce_laghialpini	MorT1R2	1814		2011	9	0	0	0	0	0	0	0
ALATici255	255	ALA	ALATi	Toce_laghialpini	MorT1R3	1814		2011	6	0	0	0	0	0	0	0
ALATici256	256	ALA	ALATi	Toce_laghialpini	MorT1R3	1814		2011	9	0	0	0	0	0	0	0
ALATici257	257	ALA	ALATi	Toce_laghialpini	MorT2R1	1814		2011	9	0	0	0	0	0	0	0
ALATici258	258	ALA	ALATi	Toce_laghialpini	MorT2R2	1814		2006	9	0	0	0	0	0	0	0
ALATici259	259	ALA	ALATi	Toce_laghialpini	Paioneinf	2002	0.007	1993	6	16	6.3	13.2	9	0.38	2	8
ALATici260	260	ALA	ALATi	Toce_laghialpini	Paioneinf	2002	0.007	1993	7	16	6.3	13.2	9	0.38	2	8
ALATici261	261	ALA	ALATi	Toce_laghialpini	Paioneinf	2002	0.007	2000	9	16	6.3	13.2	9	0.38	2	8				11.111																										21
ALATici262	262	ALA	ALATi	Toce_laghialpini	Paionemed	2147	0.007	2000	9	13	6.53	14.3	9	0.395	5	8
ALATici263	263	ALA	ALATi	Toce_laghialpini	Paionesup	2269	0.009	1996	9	13.3	5.5	10.2	9	0.395	6	42
ALATici264	264	ALA	ALATi	Toce_laghialpini	Paionesup	2269	0.009	2000	9	13.3	5.5	10.2	9	0.395	6	42
ALATici265	265	ALA	ALATi	Toce_laghialpini	Pojala	2305	0.05	2000	10	10	6.9	37	9	0.166	7	56
ALATici266	266	ALA	ALATi	Toce_laghialpini	PozzaScaredi	1909	0.002	2000	9	11.1	4.97	30	9	0.418	9	147																22.222											26
ALATici267	267	ALA	ALATi	Toce_laghialpini	Sfondato	2422	0.005	2000	10	4.2	5.58	9.5	9	0.31	2	1																														255
ALATici268	268	ALA	ALATi	Toce_laghialpini	Variolainf	2123	0.003	1985	5	10	5.5	13.2	9	0	2	3																														11.111
ALATici269	269	ALA	ALATi	Toce_laghialpini	Variolainf	2123	0.003	1985	9	10	5.5	13.2	9	0	2	3																1
ALATici270	270	ALA	ALATi	Toce_laghialpini	Variolainf	2123	0.003	1987	7	10	5.5	13.2	9	0	2	3
ALATici271	271	ALA	ALATi	Toce_laghialpini	Variolainf	2123	0.003	2000	9	10	5.5	13.2	9	0	2	3																														19
ALATici272	272	ALA	ALATi	Toce_laghialpini	Variolasup	2199	0	1984	7	9.1	5.15	13.5	7.5	0	4	10																			22.222										11.111	11.111
ALATici273	273	ALA	ALATi	Toce_laghialpini	Variolasup	2199	0	1985	7	9.1	5.15	13.5	7.5	0	4	10																														50.5555
ALATici274	274	ALA	ALATi	Toce_laghialpini	Variolasup	2199	0	1985	8	9.1	5.15	13.5	7.5	0	4	10
ALATici275	275	ALA	ALATi	Toce_laghialpini	Variolasup	2199	0	1985	9	9.1	5.15	13.5	7.5	0	4	10																														2
ALATici276	276	ALA	ALATi	Toce_laghialpini	Variolasup	2199	0	1987	7	9.1	5.15	13.5	7.5	0	4	10
ALATici277	277	ALA	ALATi	Toce_laghialpini	Variolasup	2199	0	1987	9	9.1	5.15	13.5	7.5	0	4	10																										1				1
ALATici278	278	ALA	ALATi	Toce_laghialpini	Variolasup	2199	0	1987	11	9.1	5.15	13.5	7.5	0	4	10
ALATici279	279	ALA	ALATi	Toce_laghialpini	Variolasup	2199	0	2000	9	9.1	5.15	13.5	7.5	0	4	10																														33.333
BAfri280	280	B	BAfri	Tunisia	Tunisia154	5		2010	8	0	0	0	0	0	0	0																	1
BArno281	281	B	BArno	Orbetello	Orbetello	180	100	1999	5	0	0	0	0	0	0	50																	1
BArno282	282	B	BArno	Orbetello	Orbetello	180	100	1999	9	0	0	0	0	0	0	50																	1
BPiav283	283	B	BPiav	Litveneto	LagunaVenezia	200	0	1986	6	0	0	0	0	0	0	0																	1
BPoWe284	284	B	BPoWe	Bologna	ValliBertuzziDeltaPo	30	2	1981	5	0	0	0	0	0	0	0																	1
BPoWe285	285	B	BPoWe	Bologna	ValliBertuzziDeltaPo	30	2	1981	8	0	0	0	0	0	0	0																	65
BPoWe286	286	B	BPoWe	Bologna	ValliBertuzziDeltaPo	30	2	1983	7	0	0	0	0	0	0	0																	1
BPoWe287	287	B	BPoWe	Poiano	Poiano	200	0	2016	1	0	0	0	0	0	0	0																									10
BPugl288	288	B	BPugl	Bari	Baribrackishwater	180	0	1977	3	0	0		11	0		0																		1		11									1
BPugl289	289	B	BPugl	Bari	Baribrackishwater	180	0	1980	1	0	0		11	0		0																	1
BPugl290	290	B	BPugl	Lecce	Lecce	180	0	2016	5	0	0	0	0	0	0	0																	15.5								4.625
BPugl291	291	B	BPugl	Lecce	MareAdriaticoestLecce	180	0	1991	9	0	0	0	0	0	0	0
BSard292	292	B	BSard	Cabras	Molentargius	380	8	1976	4	4	0	0	5	0	0	0																			1
BSard293	293	B	BSard	Cabras	Molentargius	380	8	1978	4	4	0	0	5	0	0	0																		12
BSard294	294	B	BSard	Cabras	Molentargius	380	8	1978	5	4	0	0	5	0	0	0																			5
BSard295	295	B	BSard	Cabras	Molentargius	380	8	1978	9	4	0	0	5	0	0	0						30											1	20	21
BSard296	296	B	BSard	Cabras	StagnodiCA	236	10	1978	4	20	0	2000	5	0	0	0
BSard297	297	B	BSard	Cabras	StagnodiCA	236	10	1978	9	20	0	2000	5	0	0	0
BSard298	298	B	BSard	rioMannu	Chia	20	102	1977	7	0	0	0	0	0	0	0																		1
BSard299	299	B	BSard	Sardegna	Carloforte	1		2010	4	0	0	0	0	0	0	0						4
BSici300	300	B	BSici	CataniafCaldo	FnaRossaCatania	200	0	1977	3	0	0	0	0	0	0	0
BSici301	301	B	BSici	Dirillo	GelaSic	180	1	1977	3	0	0	0	0	0	0	0
BSici302	302	B	BSici	Dirillo	GelaSic	180	1	1984	6	0	0	0	0	0	0	0																		1
KAdda303	303	K	KAdda	AddaCaseraChiareggio	CaseraA	1955	1	1998	7	4	0	103	0	0		0																		1
KAdda304	304	K	KAdda	AddaCaseraChiareggio	CaseraA	1955	1	1998	8	4	0	103	0	0		0
KAdda305	305	K	KAdda	AddaCaseraChiareggio	CaseraA	1955	1	1998	9	4	0	103	0	0		0
KAdda306	306	K	KAdda	AddaCaseraChiareggio	CaseraA	1955	1	1998	10	4	0	103	0	0		0
KAdda307	307	K	KAdda	AddaCaseraChiareggio	CaseraA	1955	1	1998	11	4	0	103	0	0		0									1
KAdda308	308	K	KAdda	AddaCaseraChiareggio	CaseraA	1955	1	1999	7	4	0	103	0	0		0
KAdda309	309	K	KAdda	AddaCaseraChiareggio	CaseraB	1920	2	1998	8	6.6	0	109	0	0	0	0
KAdda310	310	K	KAdda	AddaCaseraChiareggio	CaseraC	1850	3	1998	7	8	0	111	0	0		0
KAdda311	311	K	KAdda	AddaCaseraChiareggio	CaseraC	1850	3	1998	8	8	0	111	0	0		0
KAdda312	312	K	KAdda	AddaCaseraChiareggio	CaseraC	1850	3	1998	9	8	0	111	0	0		0
KAdda313	313	K	KAdda	AddaCaseraChiareggio	CaseraC	1850	3	1998	10	8	0	111	0	0		0
KAdda314	314	K	KAdda	AddaCaseraChiareggio	CaseraC	1850	3	1998	11	8	0	111	0	0		0
KAdda315	315	K	KAdda	AddaCaseraChiareggio	CaseraC	1850	3	1999	7	8	0	111	0	0		0
KAdda316	316	K	KAdda	AddaCaseraChiareggio	Chiaregg0	1840	4.2	1998	7	4.7	0	97	0	0		0																							4
KAdda317	317	K	KAdda	AddaCaseraChiareggio	Chiaregg0	1840	4.2	1998	8	4.7	0	97	0	0		0
KAdda318	318	K	KAdda	AddaCaseraChiareggio	Chiaregg0	1840	4.2	1998	9	4.7	0	97	0	0		0
KAdda319	319	K	KAdda	AddaCaseraChiareggio	Chiaregg0	1840	4.2	1998	10	4.7	0	97	0	0		0																							3
KAdda320	320	K	KAdda	AddaCaseraChiareggio	Chiaregg0	1840	4.2	1999	7	4.7	0	97	0	0		0
KAdda321	321	K	KAdda	AddaCaseraChiareggio	Chiaregg1	1840	4.2	2011	0	0	0	0	0	0	0	0
KAdda322	322	K	KAdda	AddaCaseraChiareggio	Chiaregg2	1630	4.2	1998	7	4.9	0	82.7	0	0		0																							9										4
KAdda323	323	K	KAdda	AddaCaseraChiareggio	Chiaregg2	1630	4.2	1998	8	4.9	0	82.7	0	0		0																							1										1
KAdda324	324	K	KAdda	AddaCaseraChiareggio	Chiaregg2	1630	4.2	1998	9	4.9	0	82.7	0	0		0																																	1
KAdda325	325	K	KAdda	AddaCaseraChiareggio	Chiaregg2	1630	4.2	1998	10	4.9	0	82.7	0	0		0
KAdda326	326	K	KAdda	AddaCaseraChiareggio	Chiaregg3	1620	4.2	1998	7	4.9	0	130	0	0		0																																	3
KAdda327	327	K	KAdda	AddaCaseraChiareggio	Chiaregg3	1620	4.2	1998	8	4.9	0	130	0	0		0									1														2
KAdda328	328	K	KAdda	AddaCaseraChiareggio	Chiaregg3	1620	4.2	1998	9	4.9	0	130	0	0		0
KAdda329	329	K	KAdda	AddaCaseraChiareggio	Chiaregg3	1620	4.2	1998	10	4.9	0	130	0	0		0
KAdda330	330	K	KAdda	AddaCaseraChiareggio	Chiaregg3	1620	4.2	1998	11	4.9	0	130	0	0		0
KAdda331	331	K	KAdda	AddaCaseraChiareggio	Chiaregg3	1620	4.2	1998	12	4.9	0	130	0	0		0
KAdda332	332	K	KAdda	AddaCaseraChiareggio	Chiaregg3	1620	4.2	1999	5	4.9	0	130	0	0		0
KAdda333	333	K	KAdda	AddaCaseraChiareggio	Chiaregg3	1620	4.2	1999	7	4.9	0	130	0	0		0
KAdda334	334	K	KAdda	AddaCaseraChiareggio	Chiaregg4	1383	4.2	1998	11	3.15	0	81.6	0	0		0
KAdda335	335	K	KAdda	AddaCaseraChiareggio	Chiaregg4	1383	4.2	1998	12	3.15	0	81.6	0	0		0
KAdda336	336	K	KAdda	AddaCaseraChiareggio	Chiaregg5	2170	4.2	1999	1	4	0	143	0	0		0
KAdda337	337	K	KAdda	AddaCaseraChiareggio	Chiaregg5	2170	4.2	1999	2	4	0	143	0	0		0
KAdda338	338	K	KAdda	AddaCaseraChiareggio	Chiaregg5	2170	4.2	1999	3	4	0	143	0	0		0									1
KAdda339	339	K	KAdda	AddaCaseraChiareggio	Chiaregg5	2170	4.2	1999	5	4	0	143	0	0		0
KAdda340	340	K	KAdda	AddaCaseraChiareggio	ChiareggGhPorula	1270	4.2	1983	6	7	6.8		1	0.4	65	50									1
KAdda341	341	K	KAdda	AddaCaseraChiareggio	ChiareggGhPorula	1270	4.2	1996	8	7	6.8		1	0.4	65	50																		1
KAdda342	342	K	KAdda	AddaCaseraChiareggio	ChiareggGhPorula	1270	4.2	1997	7	7	6.8		1	0.4	65	50
KAdda343	343	K	KAdda	AddaCaseraChiareggio	ChiareggGhPorula	1270	4.2	1997	8	7	6.8		1	0.4	65	50
KAdda344	344	K	KAdda	AddaCaseraChiareggio	ChiareggGhPorula	1270	4.2	1998	7	7	6.8		1	0.4	65	50
KAdda345	345	K	KAdda	AddaCaseraChiareggio	ChiareggGhPorula	1270	4.2	2016	2	7	6.8		1	0.4	65	50
KAdda346	346	K	KAdda	Disgrazia	Bignami	1612	10	1987	8	0	0	0	0	0	0	0
KAdda347	347	K	KAdda	Disgrazia	Bignami	1612	10	1993	8	0	0	0	0	0	0	0
KAdda348	348	K	KAdda	Disgrazia	Bignami	1612	10	1997	8	0	0	0	0	0	0	0
KAdda349	349	K	KAdda	Disgrazia	Mello1	2300	0.28	1979	2	0	0		0	0		0																			1
KAdda350	350	K	KAdda	Disgrazia	Mello2	2063	1.17	1979	3	0	0		0	0		0
KAdda351	351	K	KAdda	Disgrazia	Mello2	2063	1.17	1979	6	0	0		0	0		0
KAdda352	352	K	KAdda	Disgrazia	Mello3	2031	5.34	1979	3	0	0		0	0		0									1
KAdda353	353	K	KAdda	Disgrazia	Mello4	1061	7.15	1979	7	0	0		0	0		0
KAdda354	354	K	KAdda	Disgrazia	Mello4	1061	7.15	1979	8	0	0		0	0		0
KAdda355	355	K	KAdda	Disgrazia	Mello7	1308	11.15	1979	2	0	0		0	0		0																			1
KAdda356	356	K	KAdda	Disgrazia	Mello7	1308	11.15	1979	6	0	0		0	0		0
KAdda357	357	K	KAdda	Disgrazia	SassoBis	1462	4.4	1979	6	0	0		0	0		0
KAdda358	358	K	KAdda	Groppera	Groppera	2000	0.2	1978	8	10	0	30	11	0	0	40
KAdda359	359	K	KAdda	Groppera	Groppera	2000	0.2	1980	0	10	0	30	11	0	0	40
KAdda360	360	K	KAdda	Groppera	Groppera	2000	0.2	1980	8	10	0	30	11	0	0	40
KAdda361	361	K	KAdda	Groppera	Groppera	2000	0.2	1996	6	10	0	30	11	0	0	40
KAdda362	362	K	KAdda	Livigno	Foscagno	2020	0.1	1977	6	3	0	0	0	0	0	0
KAdda363	363	K	KAdda	Livigno	Foscsorg	2100	0.1	2007	9	0	0		0	0		0																							3
KAdda364	364	K	KAdda	Stelvio_Gavia	Adda00	400	0	1977	8	0	0	0	0	0	0	0
KAdda365	365	K	KAdda	Stelvio_Gavia	Adda00	400	0	1985	9	0	0	0	0	0	0	0
KAdda366	366	K	KAdda	Stelvio_Gavia	Adda00	400	0	1986	7	0	0	0	0	0	0	0
KAdda367	367	K	KAdda	Stelvio_Gavia	Adda01	122	0	1985	7	0	0	0	0	0	0	0
KAdda368	368	K	KAdda	Stelvio_Gavia	Dosegu42	2600	0.1	2003	7	12.8	7.3	87.2	0	0	0	0
KAdda369	369	K	KAdda	Stelvio_Gavia	Fornia	2700	120	1978	7	0	0	0	0	0	0	0																														1			11.111
KAdda370	370	K	KAdda	Stelvio_Gavia	ForniAEM	2180	0.5	1980	8	5.5	7.3	190	0	0	0	0
KAdda371	371	K	KAdda	Stelvio_Gavia	ForniAEM	2180	0.5	2001	9	5.5	7.3	190	0	0	0	0
KAdda372	372	K	KAdda	Stelvio_Gavia	ForniAEM	2180	0.5	2003	3	5.5	7.3	190	0	0	0	0
KAdda373	373	K	KAdda	Stelvio_Gavia	ForniAEM	2180	0.5	2004	9	5.5	7.3	190	0	0	0	0
KAdda374	374	K	KAdda	Stelvio_Gavia	Fornib	1050	9	2001	9	10	0	200	9	0	0	0
KAdda375	375	K	KAdda	Stelvio_Gavia	FornigRifugioBranca	2000	10	1980	8	8	6.7	476	0	0		0
KAdda376	376	K	KAdda	Stelvio_Gavia	FornigRifugioBranca	2000	10	2001	9	8	6.7	476	0	0		0																			3				1
KAdda377	377	K	KAdda	Stelvio_Gavia	FornigRifugioBranca	2000	10	2013	8	8	6.7	476	0	0		0
KAdda378	378	K	KAdda	Stelvio_Gavia	FornigRifugioBranca	2000	10	2013	9	8	6.7	476	0	0		0
KAdda379	379	K	KAdda	Stelvio_Gavia	Frodolfo1	1850	5.8	2015	12	9.9	7.3	10.47	1	0.2	38	50
KAdda380	380	K	KAdda	Stelvio_Gavia	Frodolfo1	1850	5.8	2016	1	9.9	7.3	10.47	1	0.2	38	50
KAdda381	381	K	KAdda	Stelvio_Gavia	Frodolfo2	2605	18	2014	3	2	7.43	10.29	1	0		0
KAdda382	382	K	KAdda	Stelvio_Gavia	Frodolfo2	2605	18	2014	12	2	7.43	10.29	1	0		0
KAdda383	383	K	KAdda	Stelvio_Gavia	Frodolfo2	2605	18	2015	3	2	7.43	10.29	1	0		0
KAdda384	384	K	KAdda	Stelvio_Gavia	Frodolfo2	2605	18	2015	12	2	7.43	10.29	1	0		0
KAdda385	385	K	KAdda	Stelvio_Gavia	Frodolfo3	146	125	2015	4	0	0	0	0	0	0	0
KAdda386	386	K	KAdda	Stelvio_Gavia	GaviaBerni1	2580	10	2003	9	0	8.31	74	0	0		0
KAdda387	387	K	KAdda	Stelvio_Gavia	GaviaBerni1	2580	10	2013	8	0	8.31	74	0	0		0								1
KAdda388	388	K	KAdda	Stelvio_Gavia	GaviaBerni1	2580	10	2013	10	0	8.31	74	0	0		0
KAdda389	389	K	KAdda	Stelvio_Gavia	GaviaBerni2	2580	10	2001	9	5	0	123.5	0	0		0																							1										3
KAdda390	390	K	KAdda	Stelvio_Gavia	Gaviasforz1	2785	10	2003	9	1.9	6.77	169	0	0	0	0																																	50
KAdda391	391	K	KAdda	Stelvio_Gavia	Gaviasforz2	2580	10	2013	10	0	7.29	112	0	0		0
KAdda392	392	K	KAdda	Stelvio_Gavia	Gaviasforzs1	2580	10	2003	9	1.7	0	0	0	0	0	0																																	7.5
KAdda393	393	K	KAdda	Stelvio_Gavia	Gaviasforztgl	2530	5	2003	9	5	7.35	123.5	0	0	0	0
KAdda394	394	K	KAdda	Stelvio_Gavia	Gaviasorg1	2461	10	1978	7	0	0		0	0		0
KAdda395	395	K	KAdda	Stelvio_Gavia	RifViolaAEM	1200	17	1985	9	10.3	6.9	96	1	0.4	120	80
KAdda396	396	K	KAdda	Stelvio_Gavia	RifViolaAEM	1200	17	1985	10	10.3	6.9	96	1	0.4	120	80
KAdda397	397	K	KAdda	Stelvio_Gavia	StelvioBraulio	2284	5	1977	8	0	0		0	0		0
KAdda398	398	K	KAdda	Stelvio_Gavia	StelvioBraulio	2284	5	2001	9	0	0		0	0		0
KAdda399	399	K	KAdda	Stelvio_Gavia	ViolaRifugio	2690	2.5	1985	7	0	0	0	0	0	0	0															3				5
KAdda400	400	K	KAdda	Stelvio_Gavia	ViolaRifugio	2690	2.5	1985	9	0	0	0	0	0	0	0
KAdda401	401	K	KAdda	Stelvio_Gavia	ViolaVal	2291	16.5	1985	5	8	7.2		1	0.2	20	100
KAdda402	402	K	KAdda	Stelvio_Gavia	ViolaVal	2291	16.5	1985	7	8	7.2		1	0.2	20	100								1															1							1
KAdda403	403	K	KAdda	Stelvio_Gavia	ViolaVal	2291	16.5	1985	8	8	7.2		1	0.2	20	100
KAdda404	404	K	KAdda	Stelvio_Gavia	ViolaVal	2291	16.5	1985	9	8	7.2		1	0.2	20	100
KAdda405	405	K	KAdda	Stelvio_Gavia	ViolaVal	2291	16.5	1995	7	8	7.2		1	0.2	20	100
KAdda406	406	K	KAdda	Trobio	Trobio1	2360	1.09	2013	7	0	7.3	121	0	0	0	0
KAdda407	407	K	KAdda	Trobio	Trobio1	2360	1.09	2013	8	0	7.3	121	0	0	0	0																														17
KAdda408	408	K	KAdda	Trobio	Trobio1	2360	1.09	2013	12	0	7.3	121	0	0	0	0
KAdda409	409	K	KAdda	Trobio	Trobio1	2360	1.09	2015	8	0	7.3	121	0	0	0	0
KAdda410	410	K	KAdda	Trobio	Trobio2	1954	2.3	2013	7	0	7.5	108	0	0		0									2																					50
KAdda411	411	K	KAdda	Trobio	Trobio2	1954	2.3	2013	8	0	7.5	108	0	0		0															5															10
KAdda412	412	K	KAdda	Trobio	Trobio4	2513	0.07	2013	8	0	7	99	0	0	0	0
KAdig413	413	K	KAdig	AdigeTN	Cavallazzaou	2138	0	2000	8	0	0	0	0	0	0	0																														11
KAdig414	414	K	KAdig	Avisio_laghi	AiexIIou	2174.3	0	2000	7	0	0	0	10	0	0	0																														383
KAdig415	415	K	KAdig	Avisio_laghi	AiexIou	2174.3	0	2000	7	0	0	0	10	0	0	0																														138
KAdig416	416	K	KAdig	Avisio_laghi	Antermoiaou	2496	0	2000	7	0	0	0	10	0	0	0																														2222
KAdig417	417	K	KAdig	Avisio_laghi	Boccheou	2247	0	2000	7	0	0	0	0	0	0	0																														513
KAdig418	418	K	KAdig	Avisio_laghi	BombaselIin	2197.3	0	2000	7	0	0	0	0	0	0	0																														224
KAdig419	419	K	KAdig	Avisio_laghi	BombaselIIou	2267.8	0	2000	7	0	0	0	0	0	0	0																														1031
KAdig420	420	K	KAdig	Avisio_laghi	BombaselIou	2197.3	0	2000	7	0	0	0	0	0	0	0																														267
KAdig421	421	K	KAdig	Avisio_laghi	Bruttoin	2209.7	0	2000	8	0	0	0	0	0	0	0																														100
KAdig422	422	K	KAdig	Avisio_laghi	Caserineou	2088	0	2000	7	0	0	0	0	0	0	0																														1676
KAdig423	423	K	KAdig	Avisio_laghi	Cecein	1880.6	0	2000	7	0	0	0	0	0	0	0																														247
KAdig424	424	K	KAdig	Avisio_laghi	Ceceou	1880.6	0	2000	7	0	0	0	0	0	0	0																														177
KAdig425	425	K	KAdig	Avisio_laghi	Forameou	2466.9	0	2000	7	0	0	0	0	0	0	0																														219
KAdig426	426	K	KAdig	Avisio_laghi	Iuribruttoin	2207.3	0	2000	7	0	0	0	0	0	0	0																														57
KAdig427	427	K	KAdig	Avisio_laghi	Iuribruttoou	2207.3	0	2000	7	0	0	0	0	0	0	0																														1121
KAdig428	428	K	KAdig	Avisio_laghi	Lagoraimagg3in	2268	0	2000	7	0	0	0	0	0	0	0																														267
KAdig429	429	K	KAdig	Avisio_laghi	Laguselou	2101.7	0	2000	8	0	0	0	0	0	0	0																														64
KAdig430	430	K	KAdig	Avisio_laghi	LusiaIIIin	2380	0	2000	7	0	0	0	0	0	0	0																														7
KAdig431	431	K	KAdig	Avisio_laghi	LusiaIIin	2352	0	2000	8	0	0	0	0	0	0	0																														21
KAdig432	432	K	KAdig	Avisio_laghi	LusiaIIIou	2380	0	2000	7	0	0	0	0	0	0	0																														171
KAdig433	433	K	KAdig	Avisio_laghi	LusiaIou	2332	0	2000	8	0	0	0	0	0	0	0																														1286
KAdig434	434	K	KAdig	Avisio_laghi	Moregnaou	2058.2	0	2000	8	0	0	0	0	0	0	0																														87
KAdig435	435	K	KAdig	Avisio_laghi	Stellunein	2099.2	0	2000	7	0	0	0	0	0	0	0																														747
KAdig436	436	K	KAdig	Avisio_laghi	Stelluneou	2099.2	0	2000	7	0	0	0	0	0	0	0																														929
KAdig437	437	K	KAdig	Avisio_laghi	Trotein	2100.5	0	2000	8	0	0	0	0	0	0	0																														645
KAdig438	438	K	KAdig	Avisio_laghi	Troteou	2100.5	0	2000	8	0	0	0	0	0	0	0																														699
KAdig439	439	K	KAdig	Fedaia	Marmoladast1	2031.6	0.2	2016	8	4.6	0	0	0	0	0	0
KAdig440	440	K	KAdig	Fedaia	Marmoladast1	2031.6	0.2	2017	8	4.6	0	0	0	0	0	0
KAdig441	441	K	KAdig	Fedaia	Marmoladast3	2031.6	0	2017	8	0	0	0	0	0	0	0
KAdig442	442	K	KAdig	Fedaia	Udai	1745		1991	9	0	0	0	0	0	0	0
KAdig443	443	K	KAdig	Martello	Martellotorrglac	2284	40	1995	9	6	0		0	0		0
KAdig444	444	K	KAdig	Ortles_Careser	caresCR1018	2694	0.1	2014	8	0	0	0	0	0	0	0
KAdig445	445	K	KAdig	Ortles_Careser	Careser1	2694	0.634	2001	8	0	6.1	95	0	0	0	0																							2
KAdig446	446	K	KAdig	Ortles_Careser	Careser1	2694	0.634	2001	9	0	6.1	95	0	0	0	0
KAdig447	447	K	KAdig	Ortles_Careser	Careser2	2642	1.841	2001	8	0	6.63	85	0	0		0																							2							6
KAdig448	448	K	KAdig	Ortles_Careser	Careser2	2642	1.841	2001	9	0	6.63	85	0	0		0																							4							4
KAdig449	449	K	KAdig	Ortles_Careser	NoceBianco	1261	0.5	2007	12	0	0	0	0	0	0	0
KAdig450	450	K	KAdig	Ortles_Careser	PianVenezia	914	0.5	1997	6	10	0	200	9	0	0	1
KAdig451	451	K	KAdig	Ortles_Careser	PianVenezia	914	0.5	2002	7	10	0	200	9	0	0	1
KAdig452	452	K	KAdig	Ortles_Careser	PianVenezia	914	0.5	2003	7	10	0	200	9	0	0	1
KAdig453	453	K	KAdig	Ortles_Careser	PianVenezia	914	0.5	2004	7	10	0	200	9	0	0	1
KAdig454	454	K	KAdig	Presanella	Baita_Velon	1000	2	1978	4	10.61	7.2	138	0	0		0
KAdig455	455	K	KAdig	Presanella	Baita_Velon	1000	2	2014	3	10.61	7.2	138	0	0		0																														2
KAdig456	456	K	KAdig	Presanella	Baita_Velon	1000	2	2014	4	10.61	7.2	138	0	0		0
KAdig457	457	K	KAdig	Presanella	Baita_Velon	1000	2	2014	5	10.61	7.2	138	0	0		0																																	20
KAdig458	458	K	KAdig	Presanella	Baita_Velon	1000	2	2014	8	10.61	7.2	138	0	0		0
KAdig459	459	K	KAdig	Presanella	Baita_Velon	1000	2	2015	1	10.61	7.2	138	0	0		0
KAdig460	460	K	KAdig	Presanella	Baita_Velon	1000	2	2015	2	10.61	7.2	138	0	0		0
KAdig461	461	K	KAdig	Presanella	Volpaia	1261	8	1978	4	11.55	7.75	175	5.7	0		0
KAdig462	462	K	KAdig	Presanella	Volpaia	1261	8	1978	12	11.55	7.75	175	5.7	0		0
KAdig463	463	K	KAdig	Presanella	Volpaia	1261	8	1979	3	11.55	7.75	175	5.7	0		0
KAdig464	464	K	KAdig	Presanella	Volpaia	1261	8	1979	4	11.55	7.75	175	5.7	0		0									1
KAdig465	465	K	KAdig	Presanella	Volpaia	1261	8	1979	11	11.55	7.75	175	5.7	0		0
KAdig466	466	K	KAdig	Presanella	Volpaia	1261	8	1979	12	11.55	7.75	175	5.7	0		0
KAdig467	467	K	KAdig	Presanella	Volpaia	1261	8	1980	2	11.55	7.75	175	5.7	0		0
KAdig468	468	K	KAdig	Presanella	Volpaia	1261	8	1981	2	11.55	7.75	175	5.7	0		0
KAdig469	469	K	KAdig	Presanella	Volpaia	1261	8	1990	9	11.55	7.75	175	5.7	0		0								1.5											1	1
KAdig470	470	K	KAdig	Presanella	Volpaia	1261	8	1995	1	11.55	7.75	175	5.7	0		0
KAdig471	471	K	KAdig	Presanella	Volpaia	1261	8	2007	2	11.55	7.75	175	5.7	0		0								2.5
KAdig472	472	K	KAdig	Presanella	Volpaia	1261	8	2007	12	11.55	7.75	175	5.7	0		0
KAdig473	473	K	KAdig	Presanella	Volpaia	1261	8	2014	3	11.55	7.75	175	5.7	0		0
KAdig474	474	K	KAdig	Presanella	Volpaia	1261	8	2014	4	11.55	7.75	175	5.7	0		0
KAdig475	475	K	KAdig	Presanella	Volpaia	1261	8	2014	5	11.55	7.75	175	5.7	0		0
KAdig476	476	K	KAdig	Presanella	Volpaia	1261	8	2014	8	11.55	7.75	175	5.7	0		0								1
KAdig477	477	K	KAdig	Presanella	Volpaia	1261	8	2015	1	11.55	7.75	175	5.7	0		0
KAdig478	478	K	KAdig	Presanella	Volpaia	1261	8	2015	2	11.55	7.75	175	5.7	0		0
KAdig479	479	K	KAdig	Presena	Presenaalphatorrglac	2500	0.5	1990	9	4.5	0	11	9.5	5		3																			11.111														11.111
KAdig480	480	K	KAdig	Tonale	tonalepassoruscelloinquinato	1883	0.1	1978	7	8	0	0	0	0	0	0									1
KAdig481	481	K	KAdig	Tonale	TonaleTNou	1883	0	1990	9	10	0	547	0	0		0									1
KAdig482	482	K	KAdig	Tonale	TonaleTNou	1883	0	2007	2	10	0	547	0	0		0
KAdig483	483	K	KAdig	Tonale	Vallazzario1	1900	0	2009	7	0	0	0	0	0	0	0									2
KAdig484	484	K	KAdig	Tovel	TovelRoccione	1178	0	2014	7	4.8	6.98	233	10.8	0	0	0
KDora485	485	K	KDora	Cervino	Cervinia_eta	2034	0.5	1980	9	4.5	0	11	0	0	0	0															1				1
KDora486	486	K	KDora	Dora_Ferret	Ferretbriomadic43	2010	0.1	1995	7	17.3	7.9	108	9.26667	0	0	0									1
KDora487	487	K	KDora	Dora_Ferret	FerretghPredeBar	230	0.5	1995	7	0.5	7.1	7.3	11.3	0	0	0																											1			2
KDora488	488	K	KDora	Dora_Ferret	FerretParch21a	2010	0.1	1995	7	0	0	0	0	0	0	0																											1		1	1
KDora489	489	K	KDora	Dora_Ferret	FerretParcheggio21b	2010	0.5	1995	7	5.5	0	0	10	0	0	0																														2
KDora490	490	K	KDora	Dora_Ferret	Ferretruscalpha	2010	0.2	1981	4	16.8	8.2	101	7.7	0	0	0
KDora491	491	K	KDora	Dora_Ferret	Ferretruscalpha	2010	0.2	1995	7	16.8	8.2	101	7.7	0	0	0
KDora492	492	K	KDora	Dora_Ferret	Ferretruscbeta65	2010	0.1	1995	7	0	0	0	0	0	0	0
KDora493	493	K	KDora	Dora_Ferret	Ferretruscdelta76	2100	30	1995	7	0	0	0	0	0	0	0
KDora494	494	K	KDora	Dora_Veny	Brenvaghsorg	1612	0.1	1995	7	7.5	8.8	235	9.2	0		0																																	3
KDora495	495	K	KDora	Dora_Veny	Brouillard	1800	30	1995	7	23.6	7.8	11.2	9.5	0		0
KDora496	496	K	KDora	Dora_Veny	CdSeigne0bisaffl	2150	0.1	1995	9	6	7.8	80	8.9	0		0
KDora497	497	K	KDora	Dora_Veny	CdSeigne0bisaffl	2150	0.1	1996	9	6	7.8	80	8.9	0		0
KDora498	498	K	KDora	Dora_Veny	CdSeigne0bisaffl	2150	0.1	1997	9	6	7.8	80	8.9	0		0																							5
KDora499	499	K	KDora	Dora_Veny	CdSeigne0bisaffl	2150	0.1	1998	7	6	7.8	80	8.9	0		0
KDora500	500	K	KDora	Dora_Veny	CdSeigne0bisaffl	2150	0.1	1998	9	6	7.8	80	8.9	0		0
KDora501	501	K	KDora	Dora_Veny	CdSeigne1bis	2150	0.1	1996	9	6.5	8.7	228	9	0		0
KDora502	502	K	KDora	Dora_Veny	CdSeigne1bis	2150	0.1	1998	9	6.5	8.7	228	9	0		0
KDora503	503	K	KDora	Dora_Veny	CdSeigne1bisaffl	2150	0.2	1996	9	6.5	7.7	228	9	0		0
KDora504	504	K	KDora	Dora_Veny	CdSeigne1bisaffl	2150	0.2	1997	9	6.5	7.7	228	9	0		0
KDora505	505	K	KDora	Dora_Veny	CdSeigne1bisaffl	2150	0.2	1998	7	6.5	7.7	228	9	0		0
KDora506	506	K	KDora	Dora_Veny	CdSeigne1bisaffl	2150	0.2	1998	9	6.5	7.7	228	9	0		0
KDora507	507	K	KDora	Dora_Veny	CdSeigne2bis	2150	0.3	1995	9	9	8	188	8.6	0		0
KDora508	508	K	KDora	Dora_Veny	CdSeigne2bis	2150	0.3	1996	9	9	8	188	8.6	0		0
KDora509	509	K	KDora	Dora_Veny	CdSeigne2bis	2150	0.3	1997	9	9	8	188	8.6	0		0																														1
KDora510	510	K	KDora	Dora_Veny	CdSeigne2bis	2150	0.3	1998	7	9	8	188	8.6	0		0
KDora511	511	K	KDora	Dora_Veny	CdSeigne2bis	2150	0.3	1998	9	9	8	188	8.6	0		0
KDora512	512	K	KDora	Dora_Veny	CdSeigne2bis	2150	0.3	1999	9	9	8	188	8.6	0		0
KDora513	513	K	KDora	Dora_Veny	CdSeigne2BisB	2100	30	1995	9	4.9	8.3	202	9.1	0	0	0
KDora514	514	K	KDora	Dora_Veny	CdSeigne2BisB	2100	30	1996	9	4.9	8.3	202	9.1	0	0	0
KDora515	515	K	KDora	Dora_Veny	CdSeigne2BisB	2100	30	1997	9	4.9	8.3	202	9.1	0	0	0
KDora516	516	K	KDora	Dora_Veny	CdSeigne2BisB	2100	30	1998	8	4.9	8.3	202	9.1	0	0	0
KDora517	517	K	KDora	Dora_Veny	CdSeigne3bis	2100	0.1	1995	9	14.2	6.6	710	2.9	0		0
KDora518	518	K	KDora	Dora_Veny	CdSeigne3bis	2100	0.1	1996	9	14.2	6.6	710	2.9	0		0															1																		1.5
KDora519	519	K	KDora	Dora_Veny	CdSeigne3bis	2100	0.1	1997	9	14.2	6.6	710	2.9	0		0																														1
KDora520	520	K	KDora	Dora_Veny	CdSeigne3bis	2100	0.1	1998	7	14.2	6.6	710	2.9	0		0
KDora521	521	K	KDora	Dora_Veny	CdSeigne3bis	2100	0.1	1998	9	14.2	6.6	710	2.9	0		0
KDora522	522	K	KDora	Dora_Veny	CdSeigne3bis	2100	0.1	1999	9	14.2	6.6	710	2.9	0		0
KDora523	523	K	KDora	Dora_Veny	CdSeigneS1	2150	0.1	1995	7	5.6	7.7	479	9.5	0		0
KDora524	524	K	KDora	Dora_Veny	CdSeigneS1	2150	0.1	1996	9	5.6	7.7	479	9.5	0		0
KDora525	525	K	KDora	Dora_Veny	CdSeigneS1	2150	0.1	1997	9	5.6	7.7	479	9.5	0		0
KDora526	526	K	KDora	Dora_Veny	CdSeigneS1	2150	0.1	1998	7	5.6	7.7	479	9.5	0		0
KDora527	527	K	KDora	Dora_Veny	CdSeigneS1	2150	0.1	1998	9	5.6	7.7	479	9.5	0		0
KDora528	528	K	KDora	Dora_Veny	CdSeigneS1	2150	0.1	1999	9	5.6	7.7	479	9.5	0		0
KDora529	529	K	KDora	Dora_Veny	CdSeigneS2	2150	0.1	1996	9	8	7.8	425	8.7	0		0
KDora530	530	K	KDora	Dora_Veny	CdSeigneS2	2150	0.1	1997	9	8	7.8	425	8.7	0		0
KDora531	531	K	KDora	Dora_Veny	CdSeigneS2	2150	0.1	1998	7	8	7.8	425	8.7	0		0
KDora532	532	K	KDora	Dora_Veny	CdSeigneS2	2150	0.1	1998	9	8	7.8	425	8.7	0		0
KDora533	533	K	KDora	Dora_Veny	Combalin	1800	5	1995	7	19.5	8.2	230	9	0	0	0															5			1
KDora534	534	K	KDora	Dora_Veny	Combalin	1800	5	1995	9	19.5	8.2	230	9	0	0	0
KDora535	535	K	KDora	Dora_Veny	Combalsorgslago	1809	0	1985	9	17.3	7.64	71	10.95	0		0															1				1
KDora536	536	K	KDora	Dora_Veny	Combalsorgslago	1809	0	1995	7	17.3	7.64	71	10.95	0		0																														1
KDora537	537	K	KDora	Dora_Veny	Combalsorgslago	1809	0	1995	9	17.3	7.64	71	10.95	0		0
KDora538	538	K	KDora	Dora_Veny	Combalsorgslago	1809	0	1996	9	17.3	7.64	71	10.95	0		0
KDora539	539	K	KDora	Dora_Veny	Courmayeur	193	84	1995	7	14.2	6.6	710	2.9	0	0	0																														1
KDora540	540	K	KDora	Dora_Veny	DoraVenyst6Combal	1800	6	1984	9	25	7.3	230	8.8	0		0
KDora541	541	K	KDora	Dora_Veny	DoraVenyst6Combal	1800	6	1985	9	25	7.3	230	8.8	0		0																			1
KDora542	542	K	KDora	Dora_Veny	DoraVenyst6Combal	1800	6	1995	3	25	7.3	230	8.8	0		0
KDora543	543	K	KDora	Dora_Veny	DoraVenyst6Combal	1800	6	1995	7	25	7.3	230	8.8	0		0
KDora544	544	K	KDora	Dora_Veny	DoraVenyst6Combal	1800	6	1995	9	25	7.3	230	8.8	0		0
KDora545	545	K	KDora	Dora_Veny	DoraVenyst6Combal	1800	6	1996	9	25	7.3	230	8.8	0		0																							1
KDora546	546	K	KDora	Dora_Veny	DoraVenyst6Combal	1800	6	1997	9	25	7.3	230	8.8	0		0
KDora547	547	K	KDora	Dora_Veny	DoraVenyst6Combal	1800	6	1998	7	25	7.3	230	8.8	0		0
KDora548	548	K	KDora	Dora_Veny	DoraVenyst6Combal	1800	6	1998	9	25	7.3	230	8.8	0		0
KDora549	549	K	KDora	Dora_Veny	DoraVenyst6Combal	1800	6	1999	9	25	7.3	230	8.8	0		0																							1
KDora550	550	K	KDora	Dora_Veny	Estellette1_torr_glac	2412	0.5	1996	9	7.5	7.2	400	9.2	0	0	0																							1
KDora551	551	K	KDora	Dora_Veny	Estellette1_torr_glac	2412	0.5	1997	9	7.5	7.2	400	9.2	0	0	0
KDora552	552	K	KDora	Dora_Veny	Estellette1_torr_glac	2412	0.5	1998	7	7.5	7.2	400	9.2	0	0	0
KDora553	553	K	KDora	Dora_Veny	Estellette1_torr_glac	2412	0.5	1998	9	7.5	7.2	400	9.2	0	0	0
KDora554	554	K	KDora	Dora_Veny	Estellette2_rif_Elis	2400	0.5	1995	7	3	6.8	474	9.5	0		0
KDora555	555	K	KDora	Dora_Veny	Estellette2_rif_Elis	2400	0.5	1995	9	3	6.8	474	9.5	0		0
KDora556	556	K	KDora	Dora_Veny	Estellette2_rif_Elis	2400	0.5	1996	9	3	6.8	474	9.5	0		0
KDora557	557	K	KDora	Dora_Veny	Estellette2_rif_Elis	2400	0.5	1997	9	3	6.8	474	9.5	0		0
KDora558	558	K	KDora	Dora_Veny	Estellette2_rif_Elis	2400	0.5	1998	7	3	6.8	474	9.5	0		0
KDora559	559	K	KDora	Dora_Veny	Estellette2_rif_Elis	2400	0.5	1998	9	3	6.8	474	9.5	0		0
KDora560	560	K	KDora	Dora_Veny	Estellette3	1987	3	1995	7	8	7.2	252	9	0		0																														1			1
KDora561	561	K	KDora	Dora_Veny	Estellette3	1987	3	1995	9	8	7.2	252	9	0		0																							1										1
KDora562	562	K	KDora	Dora_Veny	Estellette3	1987	3	1996	9	8	7.2	252	9	0		0																																	1
KDora563	563	K	KDora	Dora_Veny	Estellette3	1987	3	1997	9	8	7.2	252	9	0		0																		2												1
KDora564	564	K	KDora	Dora_Veny	Estellette3	1987	3	1998	7	8	7.2	252	9	0		0
KDora565	565	K	KDora	Dora_Veny	Estellette3	1987	3	1998	9	8	7.2	252	9	0		0
KDora566	566	K	KDora	Dora_Veny	LaLeBla4	1975	3.6	1995	7	5.6	8	30	9.6	0		0
KDora567	567	K	KDora	Dora_Veny	LaLeBla4	1975	3.6	1995	9	5.6	8	30	9.6	0		0																							1
KDora568	568	K	KDora	Dora_Veny	LaLeBla4	1975	3.6	1996	9	5.6	8	30	9.6	0		0
KDora569	569	K	KDora	Dora_Veny	LaLeBla4	1975	3.6	1997	9	5.6	8	30	9.6	0		0																							1
KDora570	570	K	KDora	Dora_Veny	LaLeBla4	1975	3.6	1998	7	5.6	8	30	9.6	0		0
KDora571	571	K	KDora	Dora_Veny	LaLeBla4	1975	3.6	1998	9	5.6	8	30	9.6	0		0
KDora572	572	K	KDora	Dora_Veny	LaLeBla4v	1964	3.6	1996	9	4.5	7.4	100	9	0	0	0
KDora573	573	K	KDora	Dora_Veny	LaLeBla4v	1964	3.6	1997	9	4.5	7.4	100	9	0	0	0																														1
KDora574	574	K	KDora	Dora_Veny	LaLeBla5	1960	3.8	1995	7	8	7.5	125.1	9	0		0																							1										3
KDora575	575	K	KDora	Dora_Veny	LaLeBla5	1960	3.8	1995	9	8	7.5	125.1	9	0		0																							1
KDora576	576	K	KDora	Dora_Veny	LaLeBla5	1960	3.8	1996	9	8	7.5	125.1	9	0		0
KDora577	577	K	KDora	Dora_Veny	LaLeBla5	1960	3.8	1997	9	8	7.5	125.1	9	0		0
KDora578	578	K	KDora	Dora_Veny	LaLeBla5	1960	3.8	1998	9	8	7.5	125.1	9	0		0
KDora579	579	K	KDora	Dora_Veny	Miagegiardsorg	1975	0.1	1950	9	0	0		0	0		0
KDora580	580	K	KDora	Dora_Veny	Miagegiardsorg	1975	0.1	1995	7	0	0		0	0		0
KDora581	581	K	KDora	Dora_Veny	Miagegiardsorg	1975	0.1	1995	9	0	0		0	0		0																							1
KDora582	582	K	KDora	Dora_Veny	MiageLverde	2100	0.2	1995	7	19	8.1	42	8.55	0	0	0
KDora583	583	K	KDora	Dora_Veny	Miageruscello0	167	0.5	2016	8	0	0	0	0	0	0	0
KDora584	584	K	KDora	Dora_Veny	Miagesupigropetrica0	1975	70	1995	7	18.8	7.7	55	9.2	0	0	0
KDora585	585	K	KDora	Dora_Veny	Miagetorbiera	2010	20	1995	7	4	5	55	5.9	0	0	0																		10												20.5
KDora586	586	K	KDora	Dora_Veny	Miagetorbiera	2010	20	1998	7	4	5	55	5.9	0	0	0			2
KDora587	587	K	KDora	Dora_Veny	RifMteBianco	2156		1995	7	0	8.27	192.4	0	0		0																																	1
KDora588	588	K	KDora	Dora_Veny	RifMteBianco	2156		1995	9	0	8.27	192.4	0	0		0
KDora589	589	K	KDora	Dora_Veny	RifMteBianco	2156		1996	9	0	8.27	192.4	0	0		0
KDora590	590	K	KDora	Dora_Veny	RifMteBianco	2156		1997	9	0	8.27	192.4	0	0		0
KDora591	591	K	KDora	Gran_Paradiso_01	PNGPSavarancheRifVittEmanalpha	1300	3	1980	9	8	0	0	0	0	0	0
KDora592	592	K	KDora	Lys	Gressoney	1828	25	1987	6	3.5	0		0	0		0
KDora593	593	K	KDora	Lys	Gressoney	1828	25	1987	7	3.5	0		0	0		0																							1
KDora594	594	K	KDora	Lys	Gressoney	1828	25	2016	1	3.5	0		0	0		0
KDora595	595	K	KDora	Lys	Gressoney	1828	25	2017	2	3.5	0		0	0		0
KDora596	596	K	KDora	Lys	Gressoney_St_Jacques	1261	5	1980	9	4.5	0	0	0	0	0	0																			1
KDora597	597	K	KDora	Lys	Gressoney_St_Jacques	1261	5	1995	9	4.5	0	0	0	0	0	0
KDora598	598	K	KDora	Lys	Gressoney_St_Jacques	1261	5	2016	1	4.5	0	0	0	0	0	0
KDora599	599	K	KDora	Lys	Lys10fronteghiacciaio	1900	0.5	1987	6	0.01	7	11	10.2	0		0																							1
KDora600	600	K	KDora	Lys	Lys10fronteghiacciaio	1900	0.5	1987	9	0.01	7	11	10.2	0		0
KDora601	601	K	KDora	Lys	VargnoIVin	1828	0	1987	6	3.7	0	0	0	0	0	0
KDora602	602	K	KDora	Lys	VargnoIVin	1828	0	1987	7	3.7	0	0	0	0	0	0
KIS_I603	603	K	KIS_I	Iceland	HofsaA	300	0	1996	7	0	0	0	0	0	0	0
KIS_I604	604	K	KIS_I	Iceland	Jokulsa	300	50	1996	7	0	0	0	0	0	0	0
KN_No605	605	K	KN_No	Norway	Bear7384/1	180		1946	5	0	0	0	0	0	0	0
KN_No606	606	K	KN_No	Norway	Finse	1000	0	1985	8	0	0	0	0	0	0	0
KOgli607	607	K	KOgli	AltoOglio_Vezza	Aprica_passo	1000	123	1990	9	10	0	111	0	0		0									10
KOgli608	608	K	KOgli	AltoOglio_Vezza	Aviolo00b	1920	0.15	1979	9	10	6.8	11.51	0	0.252	0	3
KOgli609	609	K	KOgli	AltoOglio_Vezza	Aviolo01	1920	0.15	1979	7	0	0		0	0		0
KOgli610	610	K	KOgli	AltoOglio_Vezza	Aviolo01	1920	0.15	1979	8	0	0		0	0		0																														4
KOgli611	611	K	KOgli	AltoOglio_Vezza	Aviolo01	1920	0.15	1979	9	0	0		0	0		0
KOgli612	612	K	KOgli	AltoOglio_Vezza	Aviolo02	1920	0.15	1979	8	12	0	0	0	0	0	0
KOgli613	613	K	KOgli	AltoOglio_Vezza	Aviolo02	1920	0.15	1979	9	12	0	0	0	0	0	0																			1
KOgli614	614	K	KOgli	AltoOglio_Vezza	Aviolo03	1920	0.15	1979	8	12	0		0	0		0
KOgli615	615	K	KOgli	AltoOglio_Vezza	Aviolo03	1920	0.15	1979	9	12	0		0	0		0
KOgli616	616	K	KOgli	AltoOglio_Vezza	Aviolo05a	1920	0.1	1979	9	10	6.8	12	10.2	0.25		3																							14
KOgli617	617	K	KOgli	AltoOglio_Vezza	Aviolo06	1920	11	1979	9	0	0	19.7	0	0.44	0	0
KOgli618	618	K	KOgli	AltoOglio_Vezza	Avioloa	1920	0.15	1979	9	3.5	0		0	0		0
KOgli619	619	K	KOgli	AltoOglio_Vezza	Avioloi	1920	4	1979	8	6	0	19.7	10	0.44	0	0
KOgli620	620	K	KOgli	AltoOglio_Vezza	Avioloi	1920	4	1979	9	6	0	19.7	10	0.44	0	0
KOgli621	621	K	KOgli	AltoOglio_Vezza	AviolotorrslA	1920	0.15	1979	8	0	0	0	0	0	0	0
KOgli622	622	K	KOgli	AltoOglio_Vezza	AviolotorrslA	1920	0.15	1979	9	0	0	0	0	0	0	0																							1
KOgli623	623	K	KOgli	AltoOglio_Vezza	Bighera	1388	0.1	1978	8	0	0		0	0		0
KOgli624	624	K	KOgli	AltoOglio_Vezza	Bighera	1388	0.1	1979	8	0	0		0	0		0																																	139.5
KOgli625	625	K	KOgli	AltoOglio_Vezza	Bighera	1388	0.1	1979	9	0	0		0	0		0
KOgli626	626	K	KOgli	AltoOglio_Vezza	Bighera	1388	0.1	1981	8	0	0		0	0		0
KOgli627	627	K	KOgli	AltoOglio_Vezza	Bighera2	2000	0.1	1981	8	15	0		0	0		0
KOgli628	628	K	KOgli	AltoOglio_Vezza	CividateCamuno	378	80	1978	7	0	0	0	0	0	0	0
KOgli629	629	K	KOgli	AltoOglio_Vezza	Monno	1940	20	1999	8	0	0		0	0		0
KOgli630	630	K	KOgli	AltoOglio_Vezza	Monno	1940	20	2000	5	0	0		0	0		0
KOgli631	631	K	KOgli	AltoOglio_Vezza	Monno	1940	20	2000	9	0	0		0	0		0
KOgli632	632	K	KOgli	AltoOglio_Vezza	valGrande01BS	1200	1	1978	3	11	7.6	106	5.4	0		0
KOgli633	633	K	KOgli	AltoOglio_Vezza	valGrande01BS	1200	1	1978	4	11	7.6	106	5.4	0		0
KOgli634	634	K	KOgli	AltoOglio_Vezza	valGrande01BS	1200	1	1978	7	11	7.6	106	5.4	0		0								1
KOgli635	635	K	KOgli	AltoOglio_Vezza	valGrande01BS	1200	1	1979	7	11	7.6	106	5.4	0		0								1
KOgli636	636	K	KOgli	AltoOglio_Vezza	valGrande01BS	1200	1	2007	12	11	7.6	106	5.4	0		0
KOgli637	637	K	KOgli	AltoOglio_Vezza	valGrande02BS	1200	4.9	1979	8	9	0		0	0		0																			4											1			10
KOgli638	638	K	KOgli	AltoOglio_Vezza	valGrande02BS	1200	4.9	1995	7	9	0		0	0		0
KOgli639	639	K	KOgli	AltoOglio_Vezza	Vezza1	1050	9	1978	3	15	6.13	358	9.5	0		0
KOgli640	640	K	KOgli	AltoOglio_Vezza	Vezza1	1050	9	1978	4	15	6.13	358	9.5	0		0								1
KOgli641	641	K	KOgli	AltoOglio_Vezza	Vezza1	1050	9	1978	7	15	6.13	358	9.5	0		0
KOgli642	642	K	KOgli	AltoOglio_Vezza	Vezza1	1050	9	1978	8	15	6.13	358	9.5	0		0
KOgli643	643	K	KOgli	AltoOglio_Vezza	Vezza1	1050	9	1978	11	15	6.13	358	9.5	0		0
KOgli644	644	K	KOgli	AltoOglio_Vezza	Vezza1	1050	9	1979	2	15	6.13	358	9.5	0		0
KOgli645	645	K	KOgli	AltoOglio_Vezza	Vezza1	1050	9	1979	9	15	6.13	358	9.5	0		0
KOgli646	646	K	KOgli	AltoOglio_Vezza	Vezza1	1050	9	1980	8	15	6.13	358	9.5	0		0
KOgli647	647	K	KOgli	AltoOglio_Vezza	Vezza1	1050	9	2007	2	15	6.13	358	9.5	0		0								2	1
KOgli648	648	K	KOgli	AltoOglio_Vezza	Vezza1	1050	9	2014	3	15	6.13	358	9.5	0		0
KOgli649	649	K	KOgli	AltoOglio_Vezza	Vezza1	1050	9	2014	4	15	6.13	358	9.5	0		0
KOgli650	650	K	KOgli	AltoOglio_Vezza	Vezza1	1050	9	2014	5	15	6.13	358	9.5	0		0
KOgli651	651	K	KOgli	AltoOglio_Vezza	Vezza1	1050	9	2014	8	15	6.13	358	9.5	0		0													1
KOgli652	652	K	KOgli	AltoOglio_Vezza	Vezza1	1050	9	2014	9	15	6.13	358	9.5	0		0									2
KOgli653	653	K	KOgli	AltoOglio_Vezza	Vezza1	1050	9	2014	12	15	6.13	358	9.5	0		0
KOgli654	654	K	KOgli	AltoOglio_Vezza	Vezza2	1000	21.289	1978	3	15	6.18	202	1	1.5	110	320									1.33333														1							2.33333
KOgli655	655	K	KOgli	AltoOglio_Vezza	Vezza2	1000	21.289	1978	4	15	6.18	202	1	1.5	110	320									1										1
KOgli656	656	K	KOgli	AltoOglio_Vezza	Vezza2	1000	21.289	1978	5	15	6.18	202	1	1.5	110	320
KOgli657	657	K	KOgli	AltoOglio_Vezza	Vezza2	1000	21.289	1978	7	15	6.18	202	1	1.5	110	320								1	1										2.5				3
KOgli658	658	K	KOgli	AltoOglio_Vezza	Vezza2	1000	21.289	1978	8	15	6.18	202	1	1.5	110	320								4	2										1.66667				1							2.5
KOgli659	659	K	KOgli	AltoOglio_Vezza	Vezza2	1000	21.289	1978	11	15	6.18	202	1	1.5	110	320
KOgli660	660	K	KOgli	AltoOglio_Vezza	Vezza2	1000	21.289	1979	1	15	6.18	202	1	1.5	110	320
KOgli661	661	K	KOgli	AltoOglio_Vezza	Vezza2	1000	21.289	1979	2	15	6.18	202	1	1.5	110	320									1
KOgli662	662	K	KOgli	AltoOglio_Vezza	Vezza2	1000	21.289	1979	3	15	6.18	202	1	1.5	110	320
KOgli663	663	K	KOgli	AltoOglio_Vezza	Vezza2	1000	21.289	1979	5	15	6.18	202	1	1.5	110	320
KOgli664	664	K	KOgli	AltoOglio_Vezza	Vezza2	1000	21.289	1979	7	15	6.18	202	1	1.5	110	320																							1
KOgli665	665	K	KOgli	AltoOglio_Vezza	Vezza2	1000	21.289	1979	8	15	6.18	202	1	1.5	110	320									4.5										1
KOgli666	666	K	KOgli	AltoOglio_Vezza	Vezza2	1000	21.289	1979	9	15	6.18	202	1	1.5	110	320									2										12				1										2
KOgli667	667	K	KOgli	AltoOglio_Vezza	Vezza2	1000	21.289	1979	11	15	6.18	202	1	1.5	110	320																							1										12
KOgli668	668	K	KOgli	AltoOglio_Vezza	Vezza2	1000	21.289	1979	12	15	6.18	202	1	1.5	110	320									3														1
KOgli669	669	K	KOgli	AltoOglio_Vezza	Vezza2	1000	21.289	1980	0	15	6.18	202	1	1.5	110	320
KOgli670	670	K	KOgli	AltoOglio_Vezza	Vezza2	1000	21.289	1980	1	15	6.18	202	1	1.5	110	320
KOgli671	671	K	KOgli	AltoOglio_Vezza	Vezza2	1000	21.289	1980	2	15	6.18	202	1	1.5	110	320
KOgli672	672	K	KOgli	AltoOglio_Vezza	Vezza2	1000	21.289	1980	4	15	6.18	202	1	1.5	110	320								1										1
KOgli673	673	K	KOgli	AltoOglio_Vezza	Vezza2	1000	21.289	1980	7	15	6.18	202	1	1.5	110	320
KOgli674	674	K	KOgli	AltoOglio_Vezza	Vezza2	1000	21.289	1980	8	15	6.18	202	1	1.5	110	320
KOgli675	675	K	KOgli	AltoOglio_Vezza	Vezza2	1000	21.289	1980	12	15	6.18	202	1	1.5	110	320																			1
KOgli676	676	K	KOgli	AltoOglio_Vezza	Vezza2	1000	21.289	1981	1	15	6.18	202	1	1.5	110	320
KOgli677	677	K	KOgli	AltoOglio_Vezza	Vezza2	1000	21.289	1981	2	15	6.18	202	1	1.5	110	320									1										3
KOgli678	678	K	KOgli	AltoOglio_Vezza	Vezza2	1000	21.289	1981	4	15	6.18	202	1	1.5	110	320																			7
KOgli679	679	K	KOgli	AltoOglio_Vezza	Vezza2	1000	21.289	1988	3	15	6.18	202	1	1.5	110	320
KOgli680	680	K	KOgli	AltoOglio_Vezza	Vezza2	1000	21.289	1989	7	15	6.18	202	1	1.5	110	320
KOgli681	681	K	KOgli	AltoOglio_Vezza	Vezza2	1000	21.289	2000	4	15	6.18	202	1	1.5	110	320
KOgli682	682	K	KOgli	AltoOglio_Vezza	Vezza2	1000	21.289	2007	12	15	6.18	202	1	1.5	110	320
KOgli683	683	K	KOgli	AltoOglio_Vezza	Vezza2	1000	21.289	2008	12	15	6.18	202	1	1.5	110	320																																	1
KOgli684	684	K	KOgli	AltoOglio_Vezza	Vezza2	1000	21.289	2014	3	15	6.18	202	1	1.5	110	320
KOgli685	685	K	KOgli	AltoOglio_Vezza	Vezza2	1000	21.289	2014	4	15	6.18	202	1	1.5	110	320
KOgli686	686	K	KOgli	AltoOglio_Vezza	Vezza2	1000	21.289	2014	5	15	6.18	202	1	1.5	110	320
KOgli687	687	K	KOgli	AltoOglio_Vezza	Vezza2	1000	21.289	2014	8	15	6.18	202	1	1.5	110	320
KOgli688	688	K	KOgli	AltoOglio_Vezza	Vezza2	1000	21.289	2014	9	15	6.18	202	1	1.5	110	320								1											1
KOgli689	689	K	KOgli	AltoOglio_Vezza	Vezza3	1000	1	1978	3	0	0		0	0		0
KOgli690	690	K	KOgli	AltoOglio_Vezza	Vezza3	1000	1	1978	4	0	0		0	0		0
KOgli691	691	K	KOgli	AltoOglio_Vezza	Vezza3	1000	1	1978	7	0	0		0	0		0
KOgli692	692	K	KOgli	AltoOglio_Vezza	Vezza3	1000	1	1978	8	0	0		0	0		0
KOgli693	693	K	KOgli	AltoOglio_Vezza	Vezza3	1000	1	1979	9	0	0		0	0		0									1										48
KOgli694	694	K	KOgli	AltoOglio_Vezza	Vezza3	1000	1	1979	11	0	0		0	0		0
KOgli695	695	K	KOgli	AltoOglio_Vezza	Vezza3	1000	1	1980	8	0	0		0	0		0
KOgli696	696	K	KOgli	AltoOglio_Vezza	Vezza3	1000	1	1981	2	0	0		0	0		0
KOgli697	697	K	KOgli	AltoOglio_Vezza	Vezzacascsopra	1100	8	1980	12	3	7.2	195	14.5	0	0	0
KOgli698	698	K	KOgli	AltoOglio_Vezza	VezzafontanaA	1600	6	1978	3	8	7.42	35	0	0		0																		1
KOgli699	699	K	KOgli	AltoOglio_Vezza	VezzafontanaA	1600	6	1979	8	8	7.42	35	0	0		0																		12
KOgli700	700	K	KOgli	AltoOglio_Vezza	VezzafontanaA	1600	6	1980	7	8	7.42	35	0	0		0
KOgli701	701	K	KOgli	AltoOglio_Vezza	VezzafontanaA	1600	6	1980	8	8	7.42	35	0	0		0																		1
KOgli702	702	K	KOgli	AltoOglio_Vezza	VezzafontanaB	1000	200	1978	4	7	7.1	10	14.3	0		0																			1
KOgli703	703	K	KOgli	AltoOglio_Vezza	VezzafontanaB	1000	200	1978	7	7	7.1	10	14.3	0		0																		5.33333	26
KOgli704	704	K	KOgli	AltoOglio_Vezza	VezzafontanaB	1000	200	1979	8	7	7.1	10	14.3	0		0																			2				1
KOgli705	705	K	KOgli	AltoOglio_Vezza	VezzafontanaB	1000	200	1980	7	7	7.1	10	14.3	0		0																			2
KOgli706	706	K	KOgli	AltoOglio_Vezza	VezzafontanaB	1000	200	1980	8	7	7.1	10	14.3	0		0																		2
KOgli707	707	K	KOgli	AltoOglio_Vezza	VezzafontanaB	1000	200	1980	12	7	7.1	10	14.3	0		0
KOgli708	708	K	KOgli	AltoOglio_Vezza	Vezzaigr	1000	9	1979	2	13	0		0	0		0
KOgli709	709	K	KOgli	AltoOglio_Vezza	Vezzaigr	1000	9	1979	8	13	0		0	0		0																			5				1
KOgli710	710	K	KOgli	AltoOglio_Vezza	Vezzaigr	1000	9	1979	12	13	0		0	0		0
KOgli711	711	K	KOgli	AltoOglio_Vezza	Vezzaigr	1000	9	1980	2	13	0		0	0		0
KOgli712	712	K	KOgli	AltoOglio_Vezza	Vezzaigr	1000	9	1980	4	13	0		0	0		0
KOgli713	713	K	KOgli	AltoOglio_Vezza	Vezzaigr	1000	9	1980	7	13	0		0	0		0
KOgli714	714	K	KOgli	AltoOglio_Vezza	Vezzaigr	1000	9	1980	8	13	0		0	0		0									5
KOgli715	715	K	KOgli	AltoOglio_Vezza	Vezzaigr	1000	9	1981	2	13	0		0	0		0
KOgli716	716	K	KOgli	AltoOglio_Vezza	Vezzarusc	1000	35	1978	4	5	0		0	0		0
KOgli717	717	K	KOgli	AltoOglio_Vezza	Vezzarusc	1000	35	1979	4	5	0		0	0		0									7										10				1
KOgli718	718	K	KOgli	AltoOglio_Vezza	Vezzarusc	1000	35	1979	5	5	0		0	0		0
KOgli719	719	K	KOgli	AltoOglio_Vezza	Vezzarusc	1000	35	1979	8	5	0		0	0		0
KOgli720	720	K	KOgli	AltoOglio_Vezza	Vezzarusc	1000	35	1979	12	5	0		0	0		0									6
KOgli721	721	K	KOgli	AltoOglio_Vezza	Vezzarusc	1000	35	1980	1	5	0		0	0		0								1	2
KOgli722	722	K	KOgli	AltoOglio_Vezza	Vezzarusc	1000	35	1980	4	5	0		0	0		0																			2
KOgli723	723	K	KOgli	AltoOglio_Vezza	Vezzarusc	1000	35	1980	8	5	0		0	0		0
KOgli724	724	K	KOgli	AltoOglio_Vezza	Vezzarusc	1000	35	1981	1	5	0		0	0		0									3
KOgli725	725	K	KOgli	AltoOglio_Vezza	VezzaSClem	1100	2	1978	7	10	7.68	70	0	0		0									1										1
KOgli726	726	K	KOgli	AltoOglio_Vezza	VezzaSClem	1100	2	1979	8	10	7.68	70	0	0		0																			2
KOgli727	727	K	KOgli	AltoOglio_Vezza	VezzaSClem	1100	2	1979	12	10	7.68	70	0	0		0
KOgli728	728	K	KOgli	AltoOglio_Vezza	VezzaSClem	1100	2	1996	6	10	7.68	70	0	0		0			1
KOgli729	729	K	KOgli	AltoOglio_Vezza	VezzaSClem	1100	2	1999	3	10	7.68	70	0	0		0
KOgli730	730	K	KOgli	AvioBenedettoPisgana	Aviok	1908	0.2	1978	8	10	7.3	18.4	9.3	0.33	0	1
KOgli731	731	K	KOgli	AvioBenedettoPisgana	Bnd04a	1929	0.1	1978	6	1	0	12	9	0	0	3																			1
KOgli732	732	K	KOgli	AvioBenedettoPisgana	Bnd04a	1929	0.1	1978	8	1	0	12	9	0	0	3								1
KOgli733	733	K	KOgli	AvioBenedettoPisgana	Bnd04k	1929	0.1	1978	8	11	0	200	9	0	0	3
KOgli734	734	K	KOgli	AvioBenedettoPisgana	Bnd05Avio	1929	11	1978	8	0	0	0	0	0	0	0
KOgli735	735	K	KOgli	AvioBenedettoPisgana	Bnd05MLav	1929	7	1978	8	21	0	200	9	0		0
KOgli736	736	K	KOgli	AvioBenedettoPisgana	Bnd06d	1929	0.1	1978	8	0	0	0	0	0	0	0
KOgli737	737	K	KOgli	AvioBenedettoPisgana	Bnd07e	1929	6	1978	8	11	0	200	9	0	0	0
KOgli738	738	K	KOgli	AvioBenedettoPisgana	Bnd07r	1929	2	1978	8	0	0		0	0		0								2
KOgli739	739	K	KOgli	AvioBenedettoPisgana	Bnd08r	1929	2	1978	8	11	0	200	9	0		0
KOgli740	740	K	KOgli	AvioBenedettoPisgana	Ercavalloin	2700	5	1979	8	16	0	0	0	0	0	0
KOgli741	741	K	KOgli	AvioBenedettoPisgana	Ercavalloou02	2500	105	1979	8	10	0		0	0		0								2.5																						1			83
KOgli742	742	K	KOgli	AvioBenedettoPisgana	Frigidolfo1	1200	7.4	1978	4	10.83	6.8	190	0	0		0									2										4
KOgli743	743	K	KOgli	AvioBenedettoPisgana	Frigidolfo1	1200	7.4	1978	7	10.83	6.8	190	0	0		0								2	1										1
KOgli744	744	K	KOgli	AvioBenedettoPisgana	Frigidolfo1	1200	7.4	1980	2	10.83	6.8	190	0	0		0
KOgli745	745	K	KOgli	AvioBenedettoPisgana	Frigidolfo1	1200	7.4	1980	4	10.83	6.8	190	0	0		0
KOgli746	746	K	KOgli	AvioBenedettoPisgana	Frigidolfo1	1200	7.4	1981	1	10.83	6.8	190	0	0		0
KOgli747	747	K	KOgli	AvioBenedettoPisgana	Frigidolfo1	1200	7.4	1981	2	10.83	6.8	190	0	0		0
KOgli748	748	K	KOgli	AvioBenedettoPisgana	Frigidolfo1	1200	7.4	2008	12	10.83	6.8	190	0	0		0
KOgli749	749	K	KOgli	AvioBenedettoPisgana	Frigidolfo1	1200	7.4	2014	9	10.83	6.8	190	0	0		0
KOgli750	750	K	KOgli	AvioBenedettoPisgana	Frigidolfo1	1200	7.4	2015	2	10.83	6.8	190	0	0		0
KOgli751	751	K	KOgli	AvioBenedettoPisgana	Frigidolfo2	1200	0.5	2014	9	0	0	0	0	0	0	0
KOgli752	752	K	KOgli	AvioBenedettoPisgana	Frigidolfo2	1200	0.5	2015	2	0	0	0	0	0	0	0
KOgli753	753	K	KOgli	AvioBenedettoPisgana	Frigidolfo3	1200	0	2014	9	0	0	0	0	0	0	0
KOgli754	754	K	KOgli	AvioBenedettoPisgana	Narcanello	1300	93	1978	7	8	8.38	95	14.5	0		0									6
KOgli755	755	K	KOgli	AvioBenedettoPisgana	Narcanello	1300	93	1978	8	8	8.38	95	14.5	0		0									1
KOgli756	756	K	KOgli	AvioBenedettoPisgana	Narcanello	1300	93	1978	12	8	8.38	95	14.5	0		0									1
KOgli757	757	K	KOgli	AvioBenedettoPisgana	Narcanello	1300	93	1979	1	8	8.38	95	14.5	0		0
KOgli758	758	K	KOgli	AvioBenedettoPisgana	Narcanello	1300	93	1979	2	8	8.38	95	14.5	0		0
KOgli759	759	K	KOgli	AvioBenedettoPisgana	Narcanello	1300	93	1979	4	8	8.38	95	14.5	0		0
KOgli760	760	K	KOgli	AvioBenedettoPisgana	Narcanello	1300	93	1980	7	8	8.38	95	14.5	0		0
KOgli761	761	K	KOgli	AvioBenedettoPisgana	Narcanello	1300	93	1981	4	8	8.38	95	14.5	0		0																			1
KOgli762	762	K	KOgli	AvioBenedettoPisgana	NarcanelloSozzine	1300	93	2009	7	5.2	0	0	0	0	0	0
KOgli763	763	K	KOgli	AvioBenedettoPisgana	NarcanelloSozzine5	1000	0	2009	7	0	0	289	0	0	0	0
KOgli764	764	K	KOgli	AvioBenedettoPisgana	Pisganaepsilon	1800	0.1	1980	8	2	0		0	0		0									4														1						1				1
KOgli765	765	K	KOgli	AvioBenedettoPisgana	Pisganalambda	1800	1	1980	8	4.5	0	0	0	0	0	0
KOgli766	766	K	KOgli	AvioBenedettoPisgana	Pisganatheta	1800	1	1981	8	0.01	0	0	0	0	0	0
KOgli767	767	K	KOgli	AvioBenedettoPisgana	Pisganazeta	1800	1	1981	8	0	0	0	0	0	0	0
KOgli768	768	K	KOgli	AvioBenedettoPisgana	SApollrusc1	1626	6.2	1978	6	10.94	6.4	294	5.5	0		0									1														1
KOgli769	769	K	KOgli	AvioBenedettoPisgana	SApollrusc1	1626	6.2	1978	7	10.94	6.4	294	5.5	0		0								1	2
KOgli770	770	K	KOgli	AvioBenedettoPisgana	SApollrusc1	1626	6.2	1978	9	10.94	6.4	294	5.5	0		0									1
KOgli771	771	K	KOgli	AvioBenedettoPisgana	SApollrusc1	1626	6.2	1978	11	10.94	6.4	294	5.5	0		0
KOgli772	772	K	KOgli	AvioBenedettoPisgana	SApollrusc1	1626	6.2	1979	1	10.94	6.4	294	5.5	0		0									1
KOgli773	773	K	KOgli	AvioBenedettoPisgana	SApollrusc1	1626	6.2	1979	3	10.94	6.4	294	5.5	0		0
KOgli774	774	K	KOgli	AvioBenedettoPisgana	SApollrusc1	1626	6.2	1979	4	10.94	6.4	294	5.5	0		0															1				1
KOgli775	775	K	KOgli	AvioBenedettoPisgana	SApollrusc1	1626	6.2	1979	5	10.94	6.4	294	5.5	0		0
KOgli776	776	K	KOgli	AvioBenedettoPisgana	SApollrusc1	1626	6.2	1979	11	10.94	6.4	294	5.5	0		0																							1
KOgli777	777	K	KOgli	AvioBenedettoPisgana	SApollrusc1	1626	6.2	1980	2	10.94	6.4	294	5.5	0		0
KOgli778	778	K	KOgli	AvioBenedettoPisgana	SApollrusc1	1626	6.2	1980	7	10.94	6.4	294	5.5	0		0																																	1
KOgli779	779	K	KOgli	AvioBenedettoPisgana	SApollrusc1	1626	6.2	1981	1	10.94	6.4	294	5.5	0		0
KOgli780	780	K	KOgli	AvioBenedettoPisgana	SApollrusc1	1626	6.2	2007	11	10.94	6.4	294	5.5	0		0
KOgli781	781	K	KOgli	AvioBenedettoPisgana	SApollrusc1	1626	6.2	2007	12	10.94	6.4	294	5.5	0		0
KOgli782	782	K	KOgli	AvioBenedettoPisgana	SApollrusc1	1626	6.2	2014	3	10.94	6.4	294	5.5	0		0
KOgli783	783	K	KOgli	AvioBenedettoPisgana	SApollrusc1	1626	6.2	2014	4	10.94	6.4	294	5.5	0		0
KOgli784	784	K	KOgli	AvioBenedettoPisgana	SApollrusc1	1626	6.2	2014	8	10.94	6.4	294	5.5	0		0															1
KOgli785	785	K	KOgli	AvioBenedettoPisgana	SApollrusc1	1626	6.2	2014	9	10.94	6.4	294	5.5	0		0															1
KOgli786	786	K	KOgli	AvioBenedettoPisgana	SApollrusc2	1626	6.21	2009	8	10.83	7.64	235	0	0		0
KOgli787	787	K	KOgli	AvioBenedettoPisgana	SApollrusc2	1626	6.21	2014	4	10.83	7.64	235	0	0		0
KOgli788	788	K	KOgli	AvioBenedettoPisgana	Sapollsorg	1605	9	1978	4	12.5	7.18	260	1	0		0																														1
KOgli789	789	K	KOgli	AvioBenedettoPisgana	Sapollsorg	1605	9	1978	6	12.5	7.18	260	1	0		0															2				2														3
KOgli790	790	K	KOgli	AvioBenedettoPisgana	Sapollsorg	1605	9	1978	7	12.5	7.18	260	1	0		0															1				1										3
KOgli791	791	K	KOgli	AvioBenedettoPisgana	Sapollsorg	1605	9	1978	8	12.5	7.18	260	1	0		0
KOgli792	792	K	KOgli	AvioBenedettoPisgana	Sapollsorg	1605	9	1978	9	12.5	7.18	260	1	0		0
KOgli793	793	K	KOgli	AvioBenedettoPisgana	Sapollsorg	1605	9	1978	11	12.5	7.18	260	1	0		0
KOgli794	794	K	KOgli	AvioBenedettoPisgana	Sapollsorg	1605	9	1979	2	12.5	7.18	260	1	0		0															1														6
KOgli795	795	K	KOgli	AvioBenedettoPisgana	Sapollsorg	1605	9	1979	3	12.5	7.18	260	1	0		0									1																								1
KOgli796	796	K	KOgli	AvioBenedettoPisgana	Sapollsorg	1605	9	1979	4	12.5	7.18	260	1	0		0
KOgli797	797	K	KOgli	AvioBenedettoPisgana	Sapollsorg	1605	9	1979	5	12.5	7.18	260	1	0		0															8				1										4
KOgli798	798	K	KOgli	AvioBenedettoPisgana	Sapollsorg	1605	9	1979	6	12.5	7.18	260	1	0		0																			1
KOgli799	799	K	KOgli	AvioBenedettoPisgana	Sapollsorg	1605	9	1979	8	12.5	7.18	260	1	0		0																																	1
KOgli800	800	K	KOgli	AvioBenedettoPisgana	Sapollsorg	1605	9	1979	11	12.5	7.18	260	1	0		0																																	11
KOgli801	801	K	KOgli	AvioBenedettoPisgana	Sapollsorg	1605	9	1980	1	12.5	7.18	260	1	0		0
KOgli802	802	K	KOgli	AvioBenedettoPisgana	Sapollsorg	1605	9	1980	2	12.5	7.18	260	1	0		0															1
KOgli803	803	K	KOgli	AvioBenedettoPisgana	Sapollsorg	1605	9	1980	7	12.5	7.18	260	1	0		0																																	1
KOgli804	804	K	KOgli	AvioBenedettoPisgana	Sapollsorg	1605	9	1981	1	12.5	7.18	260	1	0		0
KOgli805	805	K	KOgli	AvioBenedettoPisgana	Sapollsorg	1605	9	1981	2	12.5	7.18	260	1	0		0															10
KOgli806	806	K	KOgli	AvioBenedettoPisgana	Sapollsorg	1605	9	1981	8	12.5	7.18	260	1	0		0																			1
KOgli807	807	K	KOgli	AvioBenedettoPisgana	Sapollsorg	1605	9	2007	12	12.5	7.18	260	1	0		0
KOgli808	808	K	KOgli	AvioBenedettoPisgana	Sapollsorg	1605	9	2009	7	12.5	7.18	260	1	0		0									2						60
KOgli809	809	K	KOgli	AvioBenedettoPisgana	Sapollsorg	1605	9	2014	3	12.5	7.18	260	1	0		0															1.5
KOgli810	810	K	KOgli	AvioBenedettoPisgana	Sapollsorg	1605	9	2014	4	12.5	7.18	260	1	0		0															1
KOgli811	811	K	KOgli	AvioBenedettoPisgana	Sapollsorg	1605	9	2014	8	12.5	7.18	260	1	0		0															7.66667
KOgli812	812	K	KOgli	AvioBenedettoPisgana	Sapollsorg	1605	9	2014	9	12.5	7.18	260	1	0		0															12.5
KOgli813	813	K	KOgli	AvioBenedettoPisgana	SApollsorgsopra	1696	9	1980	7	14	0		0	0		0									2																								1
KOgli814	814	K	KOgli	AvioBenedettoPisgana	SApollsorgsopra	1696	9	1980	8	14	0		0	0		0
KOgli815	815	K	KOgli	AvioBenedettoPisgana	SApollsorgsopra	1696	9	1981	8	14	0		0	0		0															6
KOgli816	816	K	KOgli	AvioBenedettoPisgana	Temu	1050	9	1978	4	7	0		0	0		0
KOgli817	817	K	KOgli	AvioBenedettoPisgana	Temu	1050	9	1978	6	7	0		0	0		0								1																									1
KOgli818	818	K	KOgli	AvioBenedettoPisgana	Tonalepassoverslombardo	1930	0.1	1978	7	10	0	279	0	0	0	0									9														1
KOgli819	819	K	KOgli	AvioBenedettoPisgana	Valbione	1500	20	1979	3	0	0	0	0	0	0	0
KOgli820	820	K	KOgli	AvioBenedettoPisgana	Venerocolo	2539	9	1978	8	8	6.2	10.46	9	0.266	13	0								1
KOgli821	821	K	KOgli	AvioBenedettoPisgana	Vione	1050	9	1979	9	6	7.78	150	13.1	0		0
KOgli822	822	K	KOgli	AvioBenedettoPisgana	Vione	1050	9	1980	7	6	7.78	150	13.1	0		0
KOgli823	823	K	KOgli	AvioBenedettoPisgana	Vione	1050	9	1981	4	6	7.78	150	13.1	0		0									1.33333									1
KOgli824	824	K	KOgli	AvioBenedettoPisgana	Vione	1050	9	1985	5	6	7.78	150	13.1	0		0									1														1
KOgli825	825	K	KOgli	AvioBenedettoPisgana	Vione	1050	9	1985	6	6	7.78	150	13.1	0		0									1														1
KOgli826	826	K	KOgli	AvioBenedettoPisgana	Vione	1050	9	1985	7	6	7.78	150	13.1	0		0								1	3										3
KOgli827	827	K	KOgli	AvioBenedettoPisgana	Vione	1050	9	1985	8	6	7.78	150	13.1	0		0									1														2
KOgli828	828	K	KOgli	AvioBenedettoPisgana	Vione	1050	9	1985	9	6	7.78	150	13.1	0		0									2														1
KOgli829	829	K	KOgli	AvioBenedettoPisgana	Vione	1050	9	1985	10	6	7.78	150	13.1	0		0
KOgli830	830	K	KOgli	AvioBenedettoPisgana	Vione	1050	9	1985	11	6	7.78	150	13.1	0		0																							1
KOgli831	831	K	KOgli	AvioBenedettoPisgana	Vione	1050	9	1985	12	6	7.78	150	13.1	0		0																							1
KPoWe832	832	K	KPoWe	Alpi_Occ	Claviere	2000	7	2007	12	0	0	0	0	0	0	0																														1
KPoWe833	833	K	KPoWe	Alpi_Occ	Moncenisio4	1500	0.1	2015	6	0	0	0	0	0	0	0
KPoWe834	834	K	KPoWe	Alpi_Occ	PiandelRe	1300	4.6	1983	6	0	0	0	0	0	0	0																																	1
KPoWe835	835	K	KPoWe	Alpi_Occ	PoPiandelRe	600		1981	8	0	0	0	0	0	0	0
KSarc1000	1000	K	KSarc	Carealto	carC61	2285	0.71	1996	7	4.79275	5.27	12	0	0.316		0
KSarc1001	1001	K	KSarc	Carealto	carC61	2285	0.71	1996	8	4.79275	5.27	12	0	0.316		0																							14
KSarc1002	1002	K	KSarc	Carealto	carC61	2285	0.71	1996	9	4.79275	5.27	12	0	0.316		0																							36
KSarc1003	1003	K	KSarc	Carealto	carC61	2285	0.71	1997	6	4.79275	5.27	12	0	0.316		0								2															4
KSarc1004	1004	K	KSarc	Carealto	carC61	2285	0.71	1997	7	4.79275	5.27	12	0	0.316		0
KSarc1005	1005	K	KSarc	Carealto	carC61	2285	0.71	1997	8	4.79275	5.27	12	0	0.316		0																							6
KSarc1006	1006	K	KSarc	Carealto	carC61	2285	0.71	1997	9	4.79275	5.27	12	0	0.316		0
KSarc1007	1007	K	KSarc	Carealto	carC62	2285	0.71	1996	6	1.02857	5.22	4.78	10.0198	0.316	4	14
KSarc1008	1008	K	KSarc	Carealto	carC62	2285	0.71	1996	7	1.02857	5.22	4.78	10.0198	0.316	4	14
KSarc1009	1009	K	KSarc	Carealto	carC62	2285	0.71	1996	9	1.02857	5.22	4.78	10.0198	0.316	4	14
KSarc1010	1010	K	KSarc	Carealto	carC62	2285	0.71	1997	6	1.02857	5.22	4.78	10.0198	0.316	4	14								1
KSarc1011	1011	K	KSarc	Carealto	carC62	2285	0.71	1997	7	1.02857	5.22	4.78	10.0198	0.316	4	14
KSarc1012	1012	K	KSarc	Carealto	carC62	2285	0.71	1997	8	1.02857	5.22	4.78	10.0198	0.316	4	14
KSarc1013	1013	K	KSarc	Carealto	carC62	2285	0.71	1997	9	1.02857	5.22	4.78	10.0198	0.316	4	14
KSarc1014	1014	K	KSarc	Carealto	carC63	2285	0.71	1996	7	0	0		0	0.316		0
KSarc1015	1015	K	KSarc	Carealto	carC63	2285	0.71	1997	6	0	0		0	0.316		0
KSarc1016	1016	K	KSarc	Carealto	carC63	2285	0.71	1997	7	0	0		0	0.316		0
KSarc1017	1017	K	KSarc	Carealto	carC64	2285	0.18	1996	7	0	0		0	0.316		0
KSarc1018	1018	K	KSarc	Carealto	carC64	2285	0.18	1996	9	0	0		0	0.316		0
KSarc1019	1019	K	KSarc	Carealto	carC65	2285	0.18	1996	6	0	0		0	0.316		0
KSarc1020	1020	K	KSarc	Carealto	carC65	2285	0.18	1996	7	0	0		0	0.316		0
KSarc1021	1021	K	KSarc	Carealto	carC65	2285	0.18	1997	9	0	0		0	0.316		0
KSarc1022	1022	K	KSarc	Carealto	carC66	2285	0.71	1996	6	0	0		0	0.316		0
KSarc1023	1023	K	KSarc	Carealto	carC66	2285	0.71	1996	9	0	0		0	0.316		0
KSarc1024	1024	K	KSarc	Carealto	carC66	2285	0.71	1997	7	0	0		0	0.316		0
KSarc1025	1025	K	KSarc	Carealto	carC67	2285	0.18	1996	9	0	0	0	0	0.316	0	0
KSarc1026	1026	K	KSarc	Carealto	carC67	2285	0.18	1997	6	0	0	0	0	0.316	0	0
KSarc1027	1027	K	KSarc	Carealto	carC68	2285	0.18	1996	6	0	0	0	0	0.316	0	0
KSarc1028	1028	K	KSarc	Carealto	carC69	2285	0.18	1996	6	0	0	0	0	0.316	0	0
KSarc1029	1029	K	KSarc	Carealto	carC71	2170	0.71	1996	6	5.02363	5.42	12.4	0	0.267		0								3																						8
KSarc1030	1030	K	KSarc	Carealto	carC71	2170	0.71	1996	8	5.02363	5.42	12.4	0	0.267		0																							2							66.5
KSarc1031	1031	K	KSarc	Carealto	carC71	2170	0.71	1996	9	5.02363	5.42	12.4	0	0.267		0															1								13							19
KSarc1032	1032	K	KSarc	Carealto	carC71	2170	0.71	1997	6	5.02363	5.42	12.4	0	0.267		0
KSarc1033	1033	K	KSarc	Carealto	carC71	2170	0.71	1997	7	5.02363	5.42	12.4	0	0.267		0
KSarc1034	1034	K	KSarc	Carealto	carC71	2170	0.71	1997	8	5.02363	5.42	12.4	0	0.267		0																							4							21
KSarc1035	1035	K	KSarc	Carealto	carC71	2170	0.71	1997	9	5.02363	5.42	12.4	0	0.267		0																							14							5
KSarc1036	1036	K	KSarc	Carealto	carC72	2170	0.71	1996	6	1.02857	5.22	4.78	10.0198	0.267	4	14								1
KSarc1037	1037	K	KSarc	Carealto	carC72	2170	0.71	1996	7	1.02857	5.22	4.78	10.0198	0.267	4	14
KSarc1038	1038	K	KSarc	Carealto	carC72	2170	0.71	1996	9	1.02857	5.22	4.78	10.0198	0.267	4	14
KSarc1039	1039	K	KSarc	Carealto	carC72	2170	0.71	1997	6	1.02857	5.22	4.78	10.0198	0.267	4	14
KSarc1040	1040	K	KSarc	Carealto	carC72	2170	0.71	1997	8	1.02857	5.22	4.78	10.0198	0.267	4	14
KSarc1041	1041	K	KSarc	Carealto	carC72	2170	0.71	1997	9	1.02857	5.22	4.78	10.0198	0.267	4	14
KSarc1042	1042	K	KSarc	Carealto	carC73	2170	0.71	1996	6	0	0		0	0.241		0
KSarc1043	1043	K	KSarc	Carealto	carC73	2170	0.71	1996	7	0	0		0	0.241		0
KSarc1044	1044	K	KSarc	Carealto	carC73	2170	0.71	1996	9	0	0		0	0.241		0
KSarc1045	1045	K	KSarc	Carealto	carC74	2170	0.71	1996	7	0	0	0	0	0.23	0	0
KSarc1046	1046	K	KSarc	Carealto	carC74	2170	0.71	1996	9	0	0	0	0	0.23	0	0
KSarc1047	1047	K	KSarc	Carealto	carC74	2170	0.71	1997	7	0	0	0	0	0.23	0	0
KSarc1048	1048	K	KSarc	Carealto	carC75	2170	0.71	1996	9	0	0		0	0.267		0															1
KSarc1049	1049	K	KSarc	Carealto	carC75	2170	0.71	1997	6	0	0		0	0.267		0
KSarc1050	1050	K	KSarc	Carealto	carC75	2170	0.71	1997	7	0	0		0	0.267		0
KSarc1051	1051	K	KSarc	Carealto	carC76	2170	0.71	1996	7	0	0		0	0.267		0
KSarc1052	1052	K	KSarc	Carealto	carC76	2170	0.71	1996	9	0	0		0	0.267		0
KSarc1053	1053	K	KSarc	Carealto	carC76	2170	0.71	1997	6	0	0		0	0.267		0
KSarc1054	1054	K	KSarc	Carealto	carC77	2170	0.71	1996	7	0	0		0	0.267		0
KSarc1055	1055	K	KSarc	Carealto	carC77	2170	0.71	1996	9	0	0		0	0.267		0
KSarc1056	1056	K	KSarc	Carealto	carC78	2170	0.71	1996	7	0	0		0	0.23		0
KSarc1057	1057	K	KSarc	Carealto	carC78	2170	0.71	1997	7	0	0		0	0.23		0
KSarc1058	1058	K	KSarc	Carealto	carC79	2170	0.71	1996	7	0	0		0	0.23		0
KSarc1059	1059	K	KSarc	Carealto	carC79	2170	0.71	1996	9	0	0		0	0.23		0
KSarc1060	1060	K	KSarc	Carealto	carC81	1300	0.51	1996	6	9.80859	5.11	12.9	0	0.295		0								1	5														6							8
KSarc1061	1061	K	KSarc	Carealto	carC81	1300	0.51	1996	7	9.80859	5.11	12.9	0	0.295		0
KSarc1062	1062	K	KSarc	Carealto	carC81	1300	0.51	1996	8	9.80859	5.11	12.9	0	0.295		0								1	1						1								3							6
KSarc1063	1063	K	KSarc	Carealto	carC81	1300	0.51	1996	9	9.80859	5.11	12.9	0	0.295		0								2															3
KSarc1064	1064	K	KSarc	Carealto	carC81	1300	0.51	1997	6	9.80859	5.11	12.9	0	0.295		0								2															4							4
KSarc1065	1065	K	KSarc	Carealto	carC81	1300	0.51	1997	7	9.80859	5.11	12.9	0	0.295		0								10
KSarc1066	1066	K	KSarc	Carealto	carC81	1300	0.51	1997	8	9.80859	5.11	12.9	0	0.295		0																														2
KSarc1067	1067	K	KSarc	Carealto	carC81	1300	0.51	1997	9	9.80859	5.11	12.9	0	0.295		0								10
KSarc1068	1068	K	KSarc	Carealto	carC82	1300	0.72	1996	6	2.8775	5.49	4.42	0	0.28	12	17
KSarc1069	1069	K	KSarc	Carealto	carC82	1300	0.72	1996	7	2.8775	5.49	4.42	0	0.28	12	17
KSarc1070	1070	K	KSarc	Carealto	carC82	1300	0.72	1996	9	2.8775	5.49	4.42	0	0.28	12	17								1
KSarc1071	1071	K	KSarc	Carealto	carC82	1300	0.72	1997	9	2.8775	5.49	4.42	0	0.28	12	17
KSarc1072	1072	K	KSarc	Carealto	carC83	1300		1996	6	0	0		0	0.295		0
KSarc1073	1073	K	KSarc	Carealto	carC83	1300		1996	7	0	0		0	0.295		0
KSarc1074	1074	K	KSarc	Carealto	carC83	1300		1997	6	0	0		0	0.295		0
KSarc1075	1075	K	KSarc	Carealto	carC84	1300	0.72	1996	6	0	0	0	0	0.28	0	0
KSarc1076	1076	K	KSarc	Carealto	carC84	1300	0.72	1996	7	0	0	0	0	0.28	0	0									1
KSarc1077	1077	K	KSarc	Carealto	carC84	1300	0.72	1996	9	0	0	0	0	0.28	0	0
KSarc1078	1078	K	KSarc	Carealto	carC84	1300	0.72	1997	7	0	0	0	0	0.28	0	0
KSarc1079	1079	K	KSarc	Carealto	carC85	1300	0.72	1996	6	0	0	0	0	0.295	0	0									1
KSarc1080	1080	K	KSarc	Carealto	carC85	1300	0.72	1996	7	0	0	0	0	0.295	0	0
KSarc1081	1081	K	KSarc	Carealto	carC85	1300	0.72	1996	9	0	0	0	0	0.295	0	0
KSarc1082	1082	K	KSarc	Carealto	carC85	1300	0.72	1997	7	0	0	0	0	0.295	0	0								1
KSarc1083	1083	K	KSarc	Carealto	carC85	1300	0.72	1997	9	0	0	0	0	0.295	0	0								1
KSarc1084	1084	K	KSarc	Carealto	carC86	1300	0.33	1996	6	0	0		0	0.28		0
KSarc1085	1085	K	KSarc	Carealto	carC86	1300	0.33	1996	7	0	0		0	0.28		0
KSarc1086	1086	K	KSarc	Carealto	carC86	1300	0.33	1997	9	0	0		0	0.28		0
KSarc1087	1087	K	KSarc	Carealto	carC87	1300	0.72	1996	6	0	0		0	0.295		0
KSarc1088	1088	K	KSarc	Carealto	carC87	1300	0.72	1996	7	0	0		0	0.295		0
KSarc1089	1089	K	KSarc	Carealto	carC87	1300	0.72	1996	9	0	0		0	0.295		0								1
KSarc1090	1090	K	KSarc	Carealto	carC87	1300	0.72	1997	6	0	0		0	0.295		0
KSarc1091	1091	K	KSarc	Carealto	carC87	1300	0.72	1997	7	0	0		0	0.295		0								1
KSarc1092	1092	K	KSarc	Carealto	carC88	1300		1996	6	0	0		0	0.28		0								1
KSarc1093	1093	K	KSarc	Carealto	carC88	1300		1996	7	0	0		0	0.28		0								1
KSarc1094	1094	K	KSarc	Carealto	carC88	1300		1996	9	0	0		0	0.28		0
KSarc1095	1095	K	KSarc	Carealto	carC89	1300	0.72	1996	6	0	0		0	0.28		0
KSarc1096	1096	K	KSarc	Carealto	carC89	1300	0.72	1996	7	0	0		0	0.28		0															1
KSarc1097	1097	K	KSarc	Carealto	carC89	1300	0.72	1996	9	0	0		0	0.28		0
KSarc1098	1098	K	KSarc	Carealto	carC89	1300	0.72	1997	7	0	0		0	0.28		0								1
KSarc1099	1099	K	KSarc	Carealto	carC89	1300	0.72	1997	9	0	0		0	0.28		0
KSarc1100	1100	K	KSarc	Cornisello	vdrV03	2825	0.18	1997	7	0.64	0	0	0	0.207	0	0
KSarc1101	1101	K	KSarc	Cornisello	vdrV11	2775	0.71	1998	7	0.98	0	0	0	0.362	0	0
KSarc1102	1102	K	KSarc	Cornisello	vdrV11	2775	0.71	1998	9	0.98	0	0	0	0.362	0	0
KSarc1103	1103	K	KSarc	Cornisello	vdrV12	2775	0.71	1997	6	0.98	5.58	8.33	10.386	0.362	18	19
KSarc1104	1104	K	KSarc	Cornisello	vdrV12	2775	0.71	1997	8	0.98	5.58	8.33	10.386	0.362	18	19
KSarc1105	1105	K	KSarc	Cornisello	vdrV12	2775	0.71	1997	9	0.98	5.58	8.33	10.386	0.362	18	19
KSarc1106	1106	K	KSarc	Cornisello	vdrV12	2775	0.71	1998	7	0.98	5.58	8.33	10.386	0.362	18	19
KSarc1107	1107	K	KSarc	Cornisello	vdrV12	2775	0.71	1998	8	0.98	5.58	8.33	10.386	0.362	18	19
KSarc1108	1108	K	KSarc	Cornisello	vdrV12	2775	0.71	1998	9	0.98	5.58	8.33	10.386	0.362	18	19
KSarc1109	1109	K	KSarc	Cornisello	vdrV13	2775	0.71	1998	7	0.98	5.7	8	0	0.362	0	0
KSarc1110	1110	K	KSarc	Cornisello	vdrV13	2775	0.71	2010	8	0.98	5.7	8	0	0.362	0	0
KSarc1111	1111	K	KSarc	Cornisello	vdrV15	2775	0.71	1997	9	0.98	0	0	0	0.362	0	0
KSarc1112	1112	K	KSarc	Cornisello	vdrV15	2775	0.71	1998	9	0.98	0	0	0	0.362	0	0
KSarc1113	1113	K	KSarc	Cornisello	vdrV21	2720	0.46	1997	6	2.4	5.58	21.1	8.76185	0.32	44	49
KSarc1114	1114	K	KSarc	Cornisello	vdrV21	2720	0.46	1997	8	2.4	5.58	21.1	8.76185	0.32	44	49
KSarc1115	1115	K	KSarc	Cornisello	vdrV21	2720	0.46	1997	9	2.4	5.58	21.1	8.76185	0.32	44	49
KSarc1116	1116	K	KSarc	Cornisello	vdrV21	2720	0.46	1998	6	2.4	5.58	21.1	8.76185	0.32	44	49
KSarc1117	1117	K	KSarc	Cornisello	vdrV21	2720	0.46	1998	8	2.4	5.58	21.1	8.76185	0.32	44	49
KSarc1118	1118	K	KSarc	Cornisello	vdrV21	2720	0.46	1998	9	2.4	5.58	21.1	8.76185	0.32	44	49
KSarc1119	1119	K	KSarc	Cornisello	vdrV21	2720	0.46	2010	8	2.4	5.58	21.1	8.76185	0.32	44	49
KSarc1120	1120	K	KSarc	Cornisello	vdrV22	2720	0.46	1997	8	1.3	5.57	23.9	9.07867	0.362	86	154
KSarc1121	1121	K	KSarc	Cornisello	vdrV22	2720	0.46	1997	9	1.3	5.57	23.9	9.07867	0.362	86	154
KSarc1122	1122	K	KSarc	Cornisello	vdrV22	2720	0.46	1998	6	1.3	5.57	23.9	9.07867	0.362	86	154
KSarc1123	1123	K	KSarc	Cornisello	vdrV22	2720	0.46	1998	7	1.3	5.57	23.9	9.07867	0.362	86	154
KSarc1124	1124	K	KSarc	Cornisello	vdrV22	2720	0.46	1998	8	1.3	5.57	23.9	9.07867	0.362	86	154
KSarc1125	1125	K	KSarc	Cornisello	vdrV22	2720	0.46	1998	9	1.3	5.57	23.9	9.07867	0.362	86	154
KSarc1126	1126	K	KSarc	Cornisello	vdrV23	2720	0.46	1997	6	0.47	0	0	0	0.32	0	0
KSarc1127	1127	K	KSarc	Cornisello	vdrV23	2720	0.46	1997	9	0.47	0	0	0	0.32	0	0
KSarc1128	1128	K	KSarc	Cornisello	vdrV23	2720	0.46	1998	7	0.47	0	0	0	0.32	0	0
KSarc1129	1129	K	KSarc	Cornisello	vdrV23	2720	0.46	1998	9	0.47	0	0	0	0.32	0	0
KSarc1130	1130	K	KSarc	Cornisello	vdrV24	2720	0.46	1997	6	0.47	0	0	0	0.32	0	0
KSarc1131	1131	K	KSarc	Cornisello	vdrV24	2720	0.46	1997	9	0.47	0	0	0	0.32	0	0
KSarc1132	1132	K	KSarc	Cornisello	vdrV24	2720	0.46	1998	7	0.47	0	0	0	0.32	0	0
KSarc1133	1133	K	KSarc	Cornisello	vdrV24	2720	0.46	1998	9	0.47	0	0	0	0.32	0	0
KSarc1134	1134	K	KSarc	Cornisello	vdrV25	2690	0.46	1997	6	0.47	0	0	0	0.32	0	0
KSarc1135	1135	K	KSarc	Cornisello	vdrV25	2690	0.46	1997	9	0.47	0	0	0	0.32	0	0
KSarc1136	1136	K	KSarc	Cornisello	vdrV25	2690	0.46	1998	6	0.47	0	0	0	0.32	0	0
KSarc1137	1137	K	KSarc	Cornisello	vdrV25	2690	0.46	1998	7	0.47	0	0	0	0.32	0	0
KSarc1138	1138	K	KSarc	Cornisello	vdrV25	2690	0.46	1998	9	0.47	0	0	0	0.32	0	0
KSarc1139	1139	K	KSarc	Cornisello	vdrV31	2690	0.94	1997	6	4.49386	5.45	20.5	8.53616	0.324	71	74
KSarc1140	1140	K	KSarc	Cornisello	vdrV31	2690	0.94	1997	8	4.49386	5.45	20.5	8.53616	0.324	71	74
KSarc1141	1141	K	KSarc	Cornisello	vdrV31	2690	0.94	1997	9	4.49386	5.45	20.5	8.53616	0.324	71	74
KSarc1142	1142	K	KSarc	Cornisello	vdrV31	2690	0.94	1998	6	4.49386	5.45	20.5	8.53616	0.324	71	74																														2
KSarc1143	1143	K	KSarc	Cornisello	vdrV31	2690	0.94	1998	7	4.49386	5.45	20.5	8.53616	0.324	71	74
KSarc1144	1144	K	KSarc	Cornisello	vdrV31	2690	0.94	1998	8	4.49386	5.45	20.5	8.53616	0.324	71	74								2																						2
KSarc1145	1145	K	KSarc	Cornisello	vdrV31	2690	0.94	1998	9	4.49386	5.45	20.5	8.53616	0.324	71	74
KSarc1146	1146	K	KSarc	Cornisello	vdrV31	2690	0.94	2010	8	4.49386	5.45	20.5	8.53616	0.324	71	74
KSarc1147	1147	K	KSarc	Cornisello	vdrV32	2690	0.94	1997	8	0.6	0		0	0.324		0
KSarc1148	1148	K	KSarc	Cornisello	vdrV32	2690	0.94	1997	9	0.6	0		0	0.324		0
KSarc1149	1149	K	KSarc	Cornisello	vdrV32	2690	0.94	1998	7	0.6	0		0	0.324		0
KSarc1150	1150	K	KSarc	Cornisello	vdrV33	2690	0.94	1997	7	0.6	0	0	0	0.324	0	0
KSarc1151	1151	K	KSarc	Cornisello	vdrV33	2690	0.94	1997	9	0.6	0	0	0	0.324	0	0
KSarc1152	1152	K	KSarc	Cornisello	vdrV33	2690	0.94	1998	6	0.6	0	0	0	0.324	0	0
KSarc1153	1153	K	KSarc	Cornisello	vdrV33	2690	0.94	1998	9	0.6	0	0	0	0.324	0	0
KSarc1154	1154	K	KSarc	Cornisello	vdrV34	2690	0.94	1997	7	0.6	0	0	0	0.324	0	0
KSarc1155	1155	K	KSarc	Cornisello	vdrV34	2690	0.94	1997	9	0.6	0	0	0	0.324	0	0
KSarc1156	1156	K	KSarc	Cornisello	vdrV34	2690	0.94	1998	7	0.6	0	0	0	0.324	0	0								1
KSarc1157	1157	K	KSarc	Cornisello	vdrV34	2690	0.94	1998	9	0.6	0	0	0	0.324	0	0
KSarc1158	1158	K	KSarc	Cornisello	vdrV35	2690	0.94	1997	9	0.6	0	0	0	0.324	0	0
KSarc1159	1159	K	KSarc	Cornisello	vdrV35	2690	0.94	1998	7	0.6	0	0	0	0.324	0	0
KSarc1160	1160	K	KSarc	Cornisello	vdrV35	2690	0.94	1998	9	0.6	0	0	0	0.324	0	0
KSarc1161	1161	K	KSarc	Cornisello	vdrV41	2605	0.51	1997	9	0.56	0	11.9	0	0.295		0
KSarc1162	1162	K	KSarc	Cornisello	vdrV41	2605	0.51	1998	7	0.56	0	11.9	0	0.295		0
KSarc1163	1163	K	KSarc	Cornisello	vdrV41	2605	0.51	1998	8	0.56	0	11.9	0	0.295		0
KSarc1164	1164	K	KSarc	Cornisello	vdrV41	2605	0.51	1998	9	0.56	0	11.9	0	0.295		0
KSarc1165	1165	K	KSarc	Cornisello	vdrV43	2605	0.51	1997	6	0.56	0	0	0	0.295	0	0
KSarc1166	1166	K	KSarc	Cornisello	vdrV43	2605	0.51	1998	9	0.56	0	0	0	0.295	0	0
KSarc1167	1167	K	KSarc	Cornisello	vdrV44	2605	0.51	1998	9	0.56	0	0	0	0.295	0	0
KSarc1168	1168	K	KSarc	Cornisello	vdrV45	2605	0.51	1997	6	0.56	0	0	0	0.295	0	0
KSarc1169	1169	K	KSarc	Cornisello	vdrV45	2605	0.51	1997	7	0.56	0	0	0	0.295	0	0
KSarc1170	1170	K	KSarc	Cornisello	vdrV45	2605	0.51	1997	9	0.56	0	0	0	0.295	0	0
KSarc1171	1171	K	KSarc	Cornisello	vdrV51	2120		1997	6	0	0		0	0.294		0
KSarc1172	1172	K	KSarc	Cornisello	VEDR	2605	0.51	1996	8	6	5.68	14	0	0.295	32	10
KSarc1173	1173	K	KSarc	Cornisello	VEDR	2605	0.51	1997	6	6	5.68	14	0	0.295	32	10																														10
KSarc1174	1174	K	KSarc	Cornisello	VEDR	2605	0.51	1997	7	6	5.68	14	0	0.295	32	10
KSarc1175	1175	K	KSarc	Cornisello	VEDR	2605	0.51	1997	9	6	5.68	14	0	0.295	32	10
KSarc1176	1176	K	KSarc	Mandrone	Bedole1	1640	0.1	1980	9	14	0	0	0	0	0	0
KSarc1177	1177	K	KSarc	Mandrone	Bedole3	2700	0.5	1980	9	4.5	0	77	0	0	0	0
KSarc1178	1178	K	KSarc	Mandrone	Lobbia0affluente	2700	2	1990	9	3	0	0	0	0	0	0								1.5
KSarc1179	1179	K	KSarc	Mandrone	LobbiaVedretta	2700	0.5	1990	9	16.5	0	2.3	0	0		0																							1
KSarc1180	1180	K	KSarc	Mandrone	Mandronein	2399	0	1996	8	0	0		4	0		0													4													1				3
KSarc1181	1181	K	KSarc	Mandrone	Mandroneou	2399	0	1996	8	0	0		0	0		0
KSarc1182	1182	K	KSarc	Mandrone	Nardiscascata	1300	0.4	1990	9	7.4	0	41	0	0		0
KSarc1183	1183	K	KSarc	Mandrone	Pcuc	1620	60	1978	8	15	0	31	0	0		0									2																								1
KSarc1184	1184	K	KSarc	Mandrone	Pcuc	1620	60	1990	9	15	0	31	0	0		0
KSarc1185	1185	K	KSarc	Mandrone	RifBedoleValGenova	1640	2.84	1978	8	0	0	77	0	0		0									1										1														2
KSarc1186	1186	K	KSarc	Mandrone	RifBedoleValGenova	1640	2.84	1979	3	0	0	77	0	0		0
KSarc1187	1187	K	KSarc	Mandrone	RifBedoleValGenova	1640	2.84	1979	8	0	0	77	0	0		0
KSarc1188	1188	K	KSarc	Mandrone	RifBedoleValGenova	1640	2.84	1980	9	0	0	77	0	0		0
KSarc1189	1189	K	KSarc	Mandrone	RifBedoleValGenova	1640	2.84	1990	9	0	0	77	0	0		0									1									1	1				1
KSarc1190	1190	K	KSarc	Mandrone	RifBedoleValGenova	1640	2.84	1990	10	0	0	77	0	0		0
KSarc1191	1191	K	KSarc	NeroCornisello	NeroCorniselloou	2233	0	1996	7	0	0		0	0		0
KSarc1192	1192	K	KSarc	NeroCornisello	NeroCorniselloou	2233	0	1996	8	0	0		0	0		0
KSarc1193	1193	K	KSarc	Niscli	niscN01	2775	0.94	1997	7	0.38	0	5.72	0	0.244	0	0
KSarc1194	1194	K	KSarc	Niscli	niscN01	2775	0.94	1997	9	0.38	0	5.72	0	0.244	0	0
KSarc1195	1195	K	KSarc	Niscli	niscN03	2775	0.17	1997	7	0.38	0	5.72	0	0.244	0	0
KSarc1196	1196	K	KSarc	Niscli	niscN03	2775	0.17	1997	8	0.38	0	5.72	0	0.244	0	0
KSarc1197	1197	K	KSarc	Niscli	niscN05	2775	0.17	1997	9	0.38	0	5.72	0	0.244	0	0
KSarc1198	1198	K	KSarc	Niscli	niscN08	2600	1.65	1997	9	0	5.05	4.39	0	0	0	0
KSarc1199	1199	K	KSarc	Niscli	niscN11	2720	0.17	1997	9	0	0	4.39	0	0.229	0	0
KSarc1200	1200	K	KSarc	Niscli	niscN12	2720	0.46	1997	7	0	0	4.39	0	0.229	0	0
KSarc1201	1201	K	KSarc	Niscli	niscN12	2720	0.46	1997	9	0	0	4.39	0	0.229	0	0
KSarc1202	1202	K	KSarc	Niscli	niscN13	2720	0.46	1997	9	0	0	4.39	0	0.229	0	0
KSarc1203	1203	K	KSarc	Niscli	niscN14	2720	0.46	1997	9	0	0	4.39	0	0.229	0	0
KSarc1204	1204	K	KSarc	Niscli	niscN15	2720	0.46	1997	7	0	0	3.5	0	0.229	0	0
KSarc1205	1205	K	KSarc	Niscli	niscN15	2720	0.46	1997	9	0	0	3.5	0	0.229	0	0
KSarc1206	1206	K	KSarc	Niscli	niscN16	2450	0.51	1997	8	2.575	5.1	6.42	9.62405	0.229	70	49
KSarc1207	1207	K	KSarc	Niscli	niscN16	2450	0.51	1997	9	2.575	5.1	6.42	9.62405	0.229	70	49
KSarc1208	1208	K	KSarc	Niscli	niscN17	2372	0.72	1997	8	2.45	5.94	5.15	9.14321	0.23	27	42
KSarc1209	1209	K	KSarc	Niscli	niscN21	2690	0.46	1997	7	0	0		0	0.23		0
KSarc1210	1210	K	KSarc	Niscli	niscN22	2690	0.94	1997	7	0	0		0	0.23		0
KSarc1211	1211	K	KSarc	Niscli	niscN24	2690	0.94	1997	7	0	0	0	0	0.23	0	0
KSarc1212	1212	K	KSarc	Niscli	niscN25	2690	0.94	1997	7	0	0		0	0.23		0
KSarc1213	1213	K	KSarc	Sarca_laghi	Garzoneou	1940	0	1996	7	0	0	0	0	0	0	0																														1
KSarc1214	1214	K	KSarc	Sarca_laghi	GHIAinou	2571	0	1996	8	0	0		0	0		0
KSarc1215	1215	K	KSarc	Sarca_laghi	Lambinin	2327	0	1996	8	0	0		0	0		0
KSarc1216	1216	K	KSarc	Sarca_laghi	Lambinou	2327	0	1996	8	0	0		0	0		0							2
KSarc1217	1217	K	KSarc	Sarca_laghi	NUOVAB	2202	0	1996	8	0	0	0	0	0	0	0
KSarc1218	1218	K	KSarc	Sarca_laghi	SanGiulianoou	1935	0	1996	7	0	0		0	0		0																													1	1
KSarc1219	1219	K	KSarc	Sarca_laghi	SanGiulianoou	1935	0	1996	8	0	0		0	0		0																													1	1
KSarc1220	1220	K	KSarc	Sarca_laghi	SERM	2556	0	1996	7	0	0		0	0		0
KSarc1221	1221	K	KSarc	Sarca_laghi	SERM	2556	0	1996	8	0	0		0	0		0
KSarc1222	1222	K	KSarc	Sarca_laghi	SMAL	2160	0	1996	8	0	0	0	0	0	0	0
KSarc1223	1223	K	KSarc	Sarca_laghi	SMAN	2663	0	1996	8	0	0		0	0		0
KSarc1224	1224	K	KSarc	Sarca_laghi	TreLaghiIou	2256	0	1996	3	0	0	0	0	0	0	0
KSarc1225	1225	K	KSarc	Sarca_laghi	TreLaghiIou	2256	0	1996	8	0	0	0	0	0	0	0
KSarc836	836	K	KSarc	Amola	Amola	2329	200	2014	8	0	0	0	0	0	0	0
KSarc837	837	K	KSarc	Amola	Amola	2329	200	2014	9	0	0	0	0	0	0	0
KSarc838	838	K	KSarc	Amola	AmolaA1drift	2329	0	2014	9	0	0	0	0	0	0	0
KSarc839	839	K	KSarc	Amola	AmolaAM2	2329	0	2014	9	0	0	0	0	0	0	0
KSarc840	840	K	KSarc	Amola	AmolaAP1	2329	0	2014	8	0	0	0	0	0	0	0
KSarc841	841	K	KSarc	Amola	AmolaAP2	2329	0.5	2014	7	0	0	0	0	0	0	0
KSarc842	842	K	KSarc	Amola	AmolaAP2	2329	0.5	2014	8	0	0	0	0	0	0	0
KSarc843	843	K	KSarc	Amola	AmolaAQ2	2329	0.5	2014	9	0	0	0	0	0	0	0
KSarc844	844	K	KSarc	Amola	AmolaAQ3	2329	0.5	2014	8	0	0	0	0	0	0	0
KSarc845	845	K	KSarc	Amola	AmolaAQ3	2329	0.5	2014	9	0	0	0	0	0	0	0
KSarc846	846	K	KSarc	Carealto	carC01	2833	0.94	1996	8	2.8775	4.5	12.7	0	0.609		0
KSarc847	847	K	KSarc	Carealto	carC01	2833	0.94	1997	6	2.8775	4.5	12.7	0	0.609		0
KSarc848	848	K	KSarc	Carealto	carC01	2833	0.94	1997	7	2.8775	4.5	12.7	0	0.609		0
KSarc849	849	K	KSarc	Carealto	carC01	2833	0.94	1997	8	2.8775	4.5	12.7	0	0.609		0
KSarc850	850	K	KSarc	Carealto	carC01	2833	0.94	1997	9	2.8775	4.5	12.7	0	0.609		0																							24
KSarc851	851	K	KSarc	Carealto	carC01	2833	0.94	2013	8	2.8775	4.5	12.7	0	0.609		0																							93
KSarc852	852	K	KSarc	Carealto	carC02	2833	0.94	1997	7	8.1	5.49	4.42	0	0.609	12	17
KSarc853	853	K	KSarc	Carealto	carC02	2833	0.94	1997	9	8.1	5.49	4.42	0	0.609	12	17																							2
KSarc854	854	K	KSarc	Carealto	carC03	2833	0.94	1997	7	0	5.49	4.42	0	0.609	0	0
KSarc855	855	K	KSarc	Carealto	carC03	2833	0.94	1997	9	0	5.49	4.42	0	0.609	0	0
KSarc856	856	K	KSarc	Carealto	carC04	2833	0.94	1997	6	2.8775	5.49	4.42	0	0.609	12	17
KSarc857	857	K	KSarc	Carealto	carC04	2833	0.94	1997	9	2.8775	5.49	4.42	0	0.609	12	17
KSarc858	858	K	KSarc	Carealto	carC05	2833	0.94	1997	9	0	5.9	4	0	0.609		0
KSarc859	859	K	KSarc	Carealto	carC05	2833	0.94	2013	8	0	5.9	4	0	0.609		0																							93
KSarc860	860	K	KSarc	Carealto	carC11	2690	0.71	1996	7	3.71836	5.54	3.85	0	0.108		0
KSarc861	861	K	KSarc	Carealto	carC11	2690	0.71	1996	8	3.71836	5.54	3.85	0	0.108		0
KSarc862	862	K	KSarc	Carealto	carC12	2690	0.71	1996	7	2.8775	5.49	4.42	0	0.143	12	17
KSarc863	863	K	KSarc	Carealto	carC12	2690	0.71	1997	9	2.8775	5.49	4.42	0	0.143	12	17
KSarc864	864	K	KSarc	Carealto	carC13	2690	0.71	1996	7	0	4.5	12.7	8.88481	0.609	6	77
KSarc865	865	K	KSarc	Carealto	carC13	2690	0.71	1997	6	0	4.5	12.7	8.88481	0.609	6	77
KSarc866	866	K	KSarc	Carealto	carC21	2507		1996	7	5.72897	4.94	10.8	0	0.49		0								1
KSarc867	867	K	KSarc	Carealto	carC21	2507		1996	8	5.72897	4.94	10.8	0	0.49		0								2															3							2.5
KSarc868	868	K	KSarc	Carealto	carC21	2507		1996	9	5.72897	4.94	10.8	0	0.49		0
KSarc869	869	K	KSarc	Carealto	carC21	2507		1997	6	5.72897	4.94	10.8	0	0.49		0								2
KSarc870	870	K	KSarc	Carealto	carC21	2507		1997	7	5.72897	4.94	10.8	0	0.49		0								4
KSarc871	871	K	KSarc	Carealto	carC21	2507		1997	8	5.72897	4.94	10.8	0	0.49		0
KSarc872	872	K	KSarc	Carealto	carC21	2507		1997	9	5.72897	4.94	10.8	0	0.49		0								12
KSarc873	873	K	KSarc	Carealto	carC21	2507		2013	8	5.72897	4.94	10.8	0	0.49		0															3								27							40			13
KSarc874	874	K	KSarc	Carealto	carC21	2507		2014	10	5.72897	4.94	10.8	0	0.49		0
KSarc875	875	K	KSarc	Carealto	carC210	2507		1997	8	0	5.22	4.78	0	0	0	0
KSarc876	876	K	KSarc	Carealto	carC22	2507		1996	9	-0.1	4.5	12.7	8.88481	0.609	6	77
KSarc877	877	K	KSarc	Carealto	carC22	2507		1997	7	-0.1	4.5	12.7	8.88481	0.609	6	77
KSarc878	878	K	KSarc	Carealto	carC23	2507		1996	9	1	4.5	12.7	8.88481	0.609	6	77
KSarc879	879	K	KSarc	Carealto	carC23	2507		1997	6	1	4.5	12.7	8.88481	0.609	6	77
KSarc880	880	K	KSarc	Carealto	carC23	2507		1997	7	1	4.5	12.7	8.88481	0.609	6	77
KSarc881	881	K	KSarc	Carealto	carC24	2507		1997	6	1	4.5	12.7	8.88481	0.609	6	77								1
KSarc882	882	K	KSarc	Carealto	carC24	2507		1997	7	1	4.5	12.7	8.88481	0.609	6	77
KSarc883	883	K	KSarc	Carealto	carC25	2507	0.31	1996	7	1	4.5	12.7	8.88481	0.609	6	77
KSarc884	884	K	KSarc	Carealto	carC25	2507	0.31	1997	6	1	4.5	12.7	8.88481	0.609	6	77								1
KSarc885	885	K	KSarc	Carealto	carC25	2507	0.31	1997	9	1	4.5	12.7	8.88481	0.609	6	77
KSarc886	886	K	KSarc	Carealto	carC26	2507	0.31	1996	7	2.8775	0	4.42	0	0.49	12	17
KSarc887	887	K	KSarc	Carealto	carC26	2507	0.31	1997	6	2.8775	0	4.42	0	0.49	12	17
KSarc888	888	K	KSarc	Carealto	carC26	2507	0.31	1997	9	2.8775	0	4.42	0	0.49	12	17								1
KSarc889	889	K	KSarc	Carealto	carC29	2507	0.31	1997	6	0	4.5	12.7	0	0.49		0
KSarc890	890	K	KSarc	Carealto	carC29	2507	0.31	1997	9	0	4.5	12.7	0	0.49		0
KSarc891	891	K	KSarc	Carealto	carC31	2252	0.31	1996	6	8.14566	5.33	11.8	0	0.397		0								1															11							4
KSarc892	892	K	KSarc	Carealto	carC31	2252	0.31	1996	7	8.14566	5.33	11.8	0	0.397		0
KSarc893	893	K	KSarc	Carealto	carC31	2252	0.31	1996	8	8.14566	5.33	11.8	0	0.397		0								2															108							4
KSarc894	894	K	KSarc	Carealto	carC31	2252	0.31	1996	9	8.14566	5.33	11.8	0	0.397		0																														5
KSarc895	895	K	KSarc	Carealto	carC31	2252	0.31	1997	6	8.14566	5.33	11.8	0	0.397		0
KSarc896	896	K	KSarc	Carealto	carC31	2252	0.31	1997	7	8.14566	5.33	11.8	0	0.397		0								2
KSarc897	897	K	KSarc	Carealto	carC31	2252	0.31	1997	8	8.14566	5.33	11.8	0	0.397		0
KSarc898	898	K	KSarc	Carealto	carC31	2252	0.31	1997	9	8.14566	5.33	11.8	0	0.397		0
KSarc899	899	K	KSarc	Carealto	carC32	2252		1996	6	4.5	0	12	0	0.137		0
KSarc900	900	K	KSarc	Carealto	carC32	2252		1996	9	4.5	0	12	0	0.137		0
KSarc901	901	K	KSarc	Carealto	carC32	2252		1997	9	4.5	0	12	0	0.137		0
KSarc902	902	K	KSarc	Carealto	carC33	2252		1996	6	4.5	0	12.1	11.6	0.186		0
KSarc903	903	K	KSarc	Carealto	carC33	2252		1996	7	4.5	0	12.1	11.6	0.186		0
KSarc904	904	K	KSarc	Carealto	carC33	2252		1996	9	4.5	0	12.1	11.6	0.186		0
KSarc905	905	K	KSarc	Carealto	carC33	2252		1997	9	4.5	0	12.1	11.6	0.186		0
KSarc906	906	K	KSarc	Carealto	carC34	2252		1996	6	0	0		0	0.397		0
KSarc907	907	K	KSarc	Carealto	carC34	2252		1996	7	0	0		0	0.397		0
KSarc908	908	K	KSarc	Carealto	carC34	2252		1996	9	0	0		0	0.397		0
KSarc909	909	K	KSarc	Carealto	carC34	2252		1997	6	0	0		0	0.397		0
KSarc910	910	K	KSarc	Carealto	carC34	2252		1997	7	0	0		0	0.397		0								1
KSarc911	911	K	KSarc	Carealto	carC34	2252		1997	9	0	0		0	0.397		0
KSarc912	912	K	KSarc	Carealto	carC35	2252		1996	7	5.6	0	2.46	12.8	0.397	0	0								1
KSarc913	913	K	KSarc	Carealto	carC35	2252		1997	6	5.6	0	2.46	12.8	0.397	0	0
KSarc914	914	K	KSarc	Carealto	carC36	2252		1996	6	0	0		0	0.397		0								1
KSarc915	915	K	KSarc	Carealto	carC36	2252		1996	7	0	0		0	0.397		0
KSarc916	916	K	KSarc	Carealto	carC36	2252		1997	6	0	0		0	0.397		0
KSarc917	917	K	KSarc	Carealto	carC36	2252		1997	9	0	0		0	0.397		0
KSarc918	918	K	KSarc	Carealto	carC37	2252		1996	6	6.5	5.22	4.78	10.0198	0.193	4	14
KSarc919	919	K	KSarc	Carealto	carC37	2252		1996	7	6.5	5.22	4.78	10.0198	0.193	4	14								1
KSarc920	920	K	KSarc	Carealto	carC37	2252		1996	9	6.5	5.22	4.78	10.0198	0.193	4	14
KSarc921	921	K	KSarc	Carealto	carC37	2252		1997	7	6.5	5.22	4.78	10.0198	0.193	4	14								1
KSarc922	922	K	KSarc	Carealto	carC37	2252		1997	8	6.5	5.22	4.78	10.0198	0.193	4	14
KSarc923	923	K	KSarc	Carealto	carC38	2252		1996	6	0	5.6	2.4	0	0.137		0
KSarc924	924	K	KSarc	Carealto	carC38	2252		1996	7	0	5.6	2.4	0	0.137		0
KSarc925	925	K	KSarc	Carealto	carC38	2252		1996	8	0	5.6	2.4	0	0.137		0
KSarc926	926	K	KSarc	Carealto	carC39	2252		1996	7	0	5.59	2.52	0	0.397	0.038	49
KSarc927	927	K	KSarc	Carealto	carC39	2252		1996	8	0	5.59	2.52	0	0.397	0.038	49																																	1
KSarc928	928	K	KSarc	Carealto	carC39	2252		1996	9	0	5.59	2.52	0	0.397	0.038	49
KSarc929	929	K	KSarc	Carealto	carC39	2252		1997	6	0	5.59	2.52	0	0.397	0.038	49
KSarc930	930	K	KSarc	Carealto	carC39	2252		1997	7	0	5.59	2.52	0	0.397	0.038	49
KSarc931	931	K	KSarc	Carealto	carC41	2115		1996	6	8.101	5.35	11.3	0	0.257		0								2															6
KSarc932	932	K	KSarc	Carealto	carC41	2115		1996	7	8.101	5.35	11.3	0	0.257		0
KSarc933	933	K	KSarc	Carealto	carC41	2115		1996	8	8.101	5.35	11.3	0	0.257		0																							50							1
KSarc934	934	K	KSarc	Carealto	carC41	2115		1996	9	8.101	5.35	11.3	0	0.257		0																							62							7
KSarc935	935	K	KSarc	Carealto	carC41	2115		1997	6	8.101	5.35	11.3	0	0.257		0																														2
KSarc936	936	K	KSarc	Carealto	carC41	2115		1997	7	8.101	5.35	11.3	0	0.257		0
KSarc937	937	K	KSarc	Carealto	carC41	2115		1997	8	8.101	5.35	11.3	0	0.257		0																							6
KSarc938	938	K	KSarc	Carealto	carC41	2115		1997	9	8.101	5.35	11.3	0	0.257		0																							4							4
KSarc939	939	K	KSarc	Carealto	carC42	2115		1996	6	1.02857	5.22	4.78	10.0198	0.197	4	14
KSarc940	940	K	KSarc	Carealto	carC42	2115		1996	7	1.02857	5.22	4.78	10.0198	0.197	4	14
KSarc941	941	K	KSarc	Carealto	carC42	2115		1997	7	1.02857	5.22	4.78	10.0198	0.197	4	14
KSarc942	942	K	KSarc	Carealto	carC42	2115		1997	8	1.02857	5.22	4.78	10.0198	0.197	4	14
KSarc943	943	K	KSarc	Carealto	carC43	2115		1996	6	0	0		0	0.257		0								1
KSarc944	944	K	KSarc	Carealto	carC43	2115		1996	7	0	0		0	0.257		0
KSarc945	945	K	KSarc	Carealto	carC43	2115		1996	9	0	0		0	0.257		0
KSarc946	946	K	KSarc	Carealto	carC43	2115		1997	6	0	0		0	0.257		0
KSarc947	947	K	KSarc	Carealto	carC44	2115	0.18	1996	6	0	0		0	0.257		0
KSarc948	948	K	KSarc	Carealto	carC44	2115	0.18	1996	7	0	0		0	0.257		0
KSarc949	949	K	KSarc	Carealto	carC44	2115	0.18	1996	9	0	0		0	0.257		0
KSarc950	950	K	KSarc	Carealto	carC44	2115	0.18	1997	6	0	0		0	0.257		0
KSarc951	951	K	KSarc	Carealto	carC44	2115	0.18	1997	9	0	0		0	0.257		0
KSarc952	952	K	KSarc	Carealto	carC45	2115		1996	6	0	0		0	0.257		0								1
KSarc953	953	K	KSarc	Carealto	carC45	2115		1996	7	0	0		0	0.257		0
KSarc954	954	K	KSarc	Carealto	carC45	2115		1996	9	0	0		0	0.257		0
KSarc955	955	K	KSarc	Carealto	carC45	2115		1997	6	0	0		0	0.257		0
KSarc956	956	K	KSarc	Carealto	carC46	2115	0.18	1996	6	0	0	0	0	0.197	0	0
KSarc957	957	K	KSarc	Carealto	carC46	2115	0.18	1996	7	0	0	0	0	0.197	0	0
KSarc958	958	K	KSarc	Carealto	carC46	2115	0.18	1996	9	0	0	0	0	0.197	0	0
KSarc959	959	K	KSarc	Carealto	carC46	2115	0.18	1997	7	0	0	0	0	0.197	0	0
KSarc960	960	K	KSarc	Carealto	carC47	2115	0.18	1996	6	0	0		0	0.197		0
KSarc961	961	K	KSarc	Carealto	carC47	2115	0.18	1996	7	0	0		0	0.197		0
KSarc962	962	K	KSarc	Carealto	carC47	2115	0.18	1996	9	0	0		0	0.197		0
KSarc963	963	K	KSarc	Carealto	carC47	2115	0.18	1997	7	0	0		0	0.197		0
KSarc964	964	K	KSarc	Carealto	carC47	2115	0.18	1997	9	0	0		0	0.197		0
KSarc965	965	K	KSarc	Carealto	carC48	2115		1996	6	0	0		0	0.19		0
KSarc966	966	K	KSarc	Carealto	carC48	2115		1996	7	0	0		0	0.19		0
KSarc967	967	K	KSarc	Carealto	carC48	2115		1996	9	0	0		0	0.19		0
KSarc968	968	K	KSarc	Carealto	carC49	2115		1996	6	0	0		0	0.19		0
KSarc969	969	K	KSarc	Carealto	carC49	2115		1996	7	0	0		0	0.19		0
KSarc970	970	K	KSarc	Carealto	carC49	2115		1996	9	0	0		0	0.19		0
KSarc971	971	K	KSarc	Carealto	carC51	2100		1996	6	7.975	6.33	11.3	0	0.175		0								1															5
KSarc972	972	K	KSarc	Carealto	carC51	2100		1996	7	7.975	6.33	11.3	0	0.175		0									1
KSarc973	973	K	KSarc	Carealto	carC51	2100		1996	8	7.975	6.33	11.3	0	0.175		0								1	1						1								2							1
KSarc974	974	K	KSarc	Carealto	carC51	2100		1996	9	7.975	6.33	11.3	0	0.175		0																							4							1
KSarc975	975	K	KSarc	Carealto	carC51	2100		1997	6	7.975	6.33	11.3	0	0.175		0								2															4
KSarc976	976	K	KSarc	Carealto	carC51	2100		1997	8	7.975	6.33	11.3	0	0.175		0																							6
KSarc977	977	K	KSarc	Carealto	carC51	2100		1997	9	7.975	6.33	11.3	0	0.175		0																							24
KSarc978	978	K	KSarc	Carealto	carC52	2100		1996	6	1.02857	5.22	4.78	10.0198	0.193	4	14
KSarc979	979	K	KSarc	Carealto	carC52	2100		1996	7	1.02857	5.22	4.78	10.0198	0.193	4	14
KSarc980	980	K	KSarc	Carealto	carC52	2100		1997	8	1.02857	5.22	4.78	10.0198	0.193	4	14
KSarc981	981	K	KSarc	Carealto	carC53	2100		1996	6	0	0		0	0.175		0
KSarc982	982	K	KSarc	Carealto	carC53	2100		1996	7	0	0		0	0.175		0
KSarc983	983	K	KSarc	Carealto	carC53	2100		1996	9	0	0		0	0.175		0
KSarc984	984	K	KSarc	Carealto	carC54	2100		1996	6	0	0		0	0.175		0
KSarc985	985	K	KSarc	Carealto	carC54	2100		1996	7	0	0		0	0.175		0								1
KSarc986	986	K	KSarc	Carealto	carC54	2100		1996	9	0	0		0	0.175		0
KSarc987	987	K	KSarc	Carealto	carC55	2100		1996	6	0	0	0	0	0.175	0	0
KSarc988	988	K	KSarc	Carealto	carC55	2100		1996	7	0	0	0	0	0.175	0	0
KSarc989	989	K	KSarc	Carealto	carC55	2100		1996	9	0	0	0	0	0.175	0	0
KSarc990	990	K	KSarc	Carealto	carC56	2100		1996	6	0	0	0	0	0.175	0	0
KSarc991	991	K	KSarc	Carealto	carC56	2100		1996	7	0	0	0	0	0.175	0	0
KSarc992	992	K	KSarc	Carealto	carC57	2100		1996	6	0	0		0	0.175		0								1
KSarc993	993	K	KSarc	Carealto	carC57	2100		1996	7	0	0		0	0.175		0															1
KSarc994	994	K	KSarc	Carealto	carC57	2100		1996	9	0	0		0	0.175		0
KSarc995	995	K	KSarc	Carealto	carC58	2100		1996	6	0	0	0	0	0.175	0	0
KSarc996	996	K	KSarc	Carealto	carC58	2100		1996	9	0	0	0	0	0.175	0	0
KSarc997	997	K	KSarc	Carealto	carC59	2100		1996	6	0	0		0	0.175		0
KSarc998	998	K	KSarc	Carealto	carC59	2100		1996	7	0	0		0	0.175		0
KSarc999	999	K	KSarc	Carealto	carC61	2285	0.71	1996	6	4.79275	5.27	12	0	0.316		0																							10
KSesi1226	1226	K	KSesi	MteRosa	Bors	1828	0.5	1978	7	0	0		0	0		0
KSesi1227	1227	K	KSesi	MteRosa	Bors	1828	0.5	1979	7	0	0		0	0		0
KSesi1228	1228	K	KSesi	MteRosa	Olen	1100	0.5	1979	9	0	0	0	0	0	0	0
KSesi1229	1229	K	KSesi	MteRosa	Olen	1100	0.5	1990	9	0	0	0	0	0	0	0
KSesi1230	1230	K	KSesi	MteRosa	Olen	1100	0.5	1995	2	0	0	0	0	0	0	0
KSF_S1231	1231	K	KSF_S	Finland	10a_Vanajavesi_10a_SL	79.4		1966	0	0	0	0	0	0	0	0																	544
KSF_S1232	1232	K	KSF_S	Finland	10a_Vanajavesi_10a_SL	79.4		1966	7	0	0	0	0	0	0	0												1191
KSF_S1233	1233	K	KSF_S	Finland	14_Mallasvesi_14_P	84.2		1966	7	0	0	0	0	0	0	0	1
KSval1234	1234	K	KSval	Svalbard	Lon3Malayse	5	0	1996	8	0	0	0	0	0	0	0
KSval1235	1235	K	KSval	Svalbard	Lon3Malayse	5	0	1997	8	0	0	0	0	0	0	0																																	1
KSval1236	1236	K	KSval	Svalbard	SvalbardU2U1D1	5		2003	8	0	0	0	0	0	0	0																																	5
KSwit1237	1237	K	KSwit	Switzerland	AASERCH	2000	1	1997	9	0	0	0	0	0	0	0
KTici1238	1238	K	KTici	TicinoCH	Cristallinaou	2398	0.01	1994	9	0	0		0	0		0																														40
KTici1239	1239	K	KTici	TicinoCH	Laghettosupemissario	2128	0	1991	8	9.1	6.09	8.78	0	0.324	2	0.019																														3
KTici1240	1240	K	KTici	TicinoCH	Laghettosupemissario	2128	0	2007	7	9.1	6.09	8.78	0	0.324	2	0.019																														48
KTici1241	1241	K	KTici	TicinoCH	Laghettosupemissario	2128	0	2007	9	9.1	6.09	8.78	0	0.324	2	0.019																														36.5
KTici1242	1242	K	KTici	TicinoCH	Laiozzaou	2365	0.013	1991	9	0	0	0	0	0	0	0																														110
KTici1243	1243	K	KTici	TicinoCH	Matorgnou	2450	0.022	1993	8	0	0	0	0	0	0	0																														2
KTici1244	1244	K	KTici	TicinoCH	Matorgnou	2450	0.022	2000	9	0	0	0	0	0	0	0
KTici1245	1245	K	KTici	TicinoCH	PiccoloNaretin	2348	0.02	1994	9	0	0		0	0		0																												2		2
KTici1246	1246	K	KTici	TicinoCH	PiccoloNaretou	2348	0.02	1994	9	0	0		0	0		0																														3
KTici1247	1247	K	KTici	Toce_laghialpini	BodenInfin	2334	0.05	1994	9	6	7.87	58.1	3.72	0.17	2	7																														102
KTici1248	1248	K	KTici	Toce_laghialpini	BodenInfou	2334	0.05	1994	9	0	0	57	9.3765	0.038	2	2.2824																														6
KTici1249	1249	K	KTici	Toce_laghialpini	BodenSupou	2343	0.03	1994	9	0	0		0	0		0																														60
KTici1250	1250	K	KTici	Toce_laghialpini	CampoIVin	2279	0.007	2000	10	5.2	7.47	54.7	9	0.228	4	1																														1
KTici1251	1251	K	KTici	Toce_laghialpini	CampoIVou	2279	0.007	2000	10	1	7.5	49.3	9	0.228	4	1
KTici1252	1252	K	KTici	Toce_laghialpini	Capezzone_ou	2100	0.009	2000	9	1	6.8	22.7	9	0	4	1
KTici1253	1253	K	KTici	Toce_laghialpini	Geccioou	2109	0.01	2000	9	0	0		0	0		0																														58
KTici1254	1254	K	KTici	Toce_laghialpini	Grandein	2269	0.007	2000	10	1	0	8	9	0	4	1
KTici1255	1255	K	KTici	Toce_laghialpini	Grandeou	2269	0.007	2000	10	10	5.76	8.2	9	0.215	4	1																														1
KTici1256	1256	K	KTici	Toce_laghialpini	Marmoou	1988	0.002	2000	9	0	0	0	0	0	0	0																														258
KTici1257	1257	K	KTici	Toce_laghialpini	Matognoin	2087	0.03	2000	9	1	0	11.7	1	0	4	1																														1
KTici1258	1258	K	KTici	Toce_laghialpini	Matognoou	2087	0.03	1991	7	1	7.9	80.4	2	0.191	6	1
KTici1259	1259	K	KTici	Toce_laghialpini	Matognoou	2087	0.03	2000	9	1	7.9	80.4	2	0.191	6	1
KTici1260	1260	K	KTici	Toce_laghialpini	PaioneInfin	2002	0.007	2000	9	0	6.3	13	1	0.298	2	3.6401																														105
KTici1261	1261	K	KTici	Toce_laghialpini	PaioneInfou	2002	0.007	2000	9	0	0	13	4	0.298	2	3.6401																													6	9
KTici1262	1262	K	KTici	Toce_laghialpini	PaioneInfou	2002	0.007	2000	10	0	0	13	4	0.298	2	3.6401
KTici1263	1263	K	KTici	Toce_laghialpini	Paionemedou	2147	0.007	2000	9	0	0	0	3	0	0	0																														28
KTici1264	1264	K	KTici	Toce_laghialpini	PaioneSupou	2269	0.009	2000	9	0	0	9.6295	10.4116	0.395	4	31.5499																														12
KTici1265	1265	K	KTici	Toce_laghialpini	Panelatteou	2147	0.007	1991	7	9	6.7	13.3	8	0	4	12																														1
KTici1266	1266	K	KTici	Toce_laghialpini	Panelatteou	2147	0.007	2000	7	9	6.7	13.3	8	0	4	12
KTici1267	1267	K	KTici	Toce_laghialpini	Pojalain	2305	0.05	2000	10	0	0	0	9	0	0	0																							8							2
KTici1268	1268	K	KTici	Toce_laghialpini	Pojalaou	2305	0.05	2000	9	1	7.2	33.3	2	0	4	2
KTici1269	1269	K	KTici	Toce_laghialpini	Pojalaou	2305	0.05	2000	10	1	7.2	33.3	2	0	4	2																														2
KTici1270	1270	K	KTici	Toce_laghialpini	Sfondatoin	2422	0.005	2000	10	0	0	0	0	0	0	0																														43
KTici1271	1271	K	KTici	Toce_laghialpini	Sfondatoou	2422	0.005	2000	10	0	0	0	0	0	0	0																														12
KTici1272	1272	K	KTici	Toce_laghialpini	VariolaInfin	2123	0.003	1985	10	0	0	0	0	0	0	0
KTici1273	1273	K	KTici	Toce_laghialpini	VariolaInfin	2123	0.003	2000	9	0	0	0	0	0	0	0																														1
KTici1274	1274	K	KTici	Toce_laghialpini	VariolaInfou	2123	0.003	2000	9	0	0	0	0	0	0	0																														23
KTici1275	1275	K	KTici	Toce_laghialpini	VariolaSupin	2190	0.009	2000	9	0	0	0	0	0	0	0																														30
KTici1276	1276	K	KTici	Toce_laghialpini	VariolaSupou	2190	0.009	2000	9	0	0	0	0	0	0	0																														9
LLAdda1277	1277	LL	LLAdd	Como	Como04Dervio	198	131	1951	6	10	0	200	9	0	34	0
LLAdda1278	1278	LL	LLAdd	Como	Como35Bellagio	198	142	1996	2	0	0	176	9	0	73	0									1
LLAdda1279	1279	LL	LLAdd	Como	ComoAbbadia0	198	139	2009	1	0	0	176	9	0	0	0																															133.333
LLAdda1280	1280	LL	LLAdd	Como	ComoAbbadia000	198	139	2009	1	10	7.9	200	6.2	0	58.5	0																															11.111
LLAdda1281	1281	LL	LLAdd	Como	ComoAbbadia10	198	139	2007	7	0	0	0	0	0	0	0																										55.555
LLAdda1282	1282	LL	LLAdd	Como	ComoAbbadia10	198	139	2009	1	0	0	0	0	0	0	0												785.185																	14.8148
LLAdda1283	1283	LL	LLAdd	Como	ComoAbbadia15	198	139	2007	7	0	0	0	0	0	0	0																										11.111					11.111
LLAdda1284	1284	LL	LLAdd	Como	ComoAbbadia25	198	139	2007	7	0	0	176	9	0	0	0
LLAdda1285	1285	LL	LLAdd	Como	ComoAbbadiaLariana	198	139	2007	7	0	0	0	0	0	0	0																										11.111
LLAdda1286	1286	LL	LLAdd	Como	ComoAbbadiaLariana	198	139	2009	1	0	0	0	0	0	0	0												14.8148														29.6296			118.519		14.8148
LLAdda1287	1287	LL	LLAdd	Como	ComoAbbadiaLariana	198	139	2009	10	0	0	0	0	0	0	0												14.8148				14.8148
LLAdda1288	1288	LL	LLAdd	Como	ComoAbbadiaLariana15a	198	139	2007	7	12	0	176	9	0	0	0
LLAdda1289	1289	LL	LLAdd	Como	ComoAbbadiaPM	198	139	1969	7	10	8	200	9	0.844	0	0																2511.11
LLAdda1290	1290	LL	LLAdd	Como	ComoArgegno	198	154	2004	4	18.8	7.2	200	7	0.93	112	300													15						1
LLAdda1291	1291	LL	LLAdd	Como	ComoArgegno	198	154	2004	6	18.8	7.2	200	7	0.93	112	300													21						25
LLAdda1292	1292	LL	LLAdd	Como	ComoArgegno	198	154	2004	8	18.8	7.2	200	7	0.93	112	300													4.5
LLAdda1293	1293	LL	LLAdd	Como	ComoArgegno	198	154	2005	1	18.8	7.2	200	7	0.93	112	300													3
LLAdda1294	1294	LL	LLAdd	Como	ComoArgegno	198	154	2005	2	18.8	7.2	200	7	0.93	112	300													3
LLAdda1295	1295	LL	LLAdd	Como	ComoArgegno	198	154	2007	8	18.8	7.2	200	7	0.93	112	300												149.999														11.111			166.665
LLAdda1296	1296	LL	LLAdd	Como	ComoArgegno15	198	154	2007	8	15	0	0	0	0	0	0												122.221																			11.111
LLAdda1297	1297	LL	LLAdd	Como	ComoArgegno25	198	154	2007	8	11	0	200	0	0	0	0												11.111
LLAdda1298	1298	LL	LLAdd	Como	ComoArgegnob	198	154	2007	8	11	0	0	0	0	0	0												66.666
LLAdda1299	1299	LL	LLAdd	Como	ComoArgegnoc	198	154	2007	8	18	0	0	0	0	0	0												44.444																	33.333
LLAdda1300	1300	LL	LLAdd	Como	ComoArgegnod	198	154	2007	8	0	0	0	0	0	0	0
LLAdda1301	1301	LL	LLAdd	Como	ComoCentroLago	198	170	1997	9	0	0	0	0	0	0	0
LLAdda1302	1302	LL	LLAdd	Como	ComoCentroLago10	198	170	2005	5	18	7.7	400	7.8	0.86	48	2																88.8889
LLAdda1303	1303	LL	LLAdd	Como	ComoComo10	198	170	2007	7	20.3	8.6	201	9	0.52	25	38
LLAdda1304	1304	LL	LLAdd	Como	ComoComo10	198	170	2009	1	20.3	8.6	201	9	0.52	25	38												14.8148				933.333
LLAdda1305	1305	LL	LLAdd	Como	ComoComo20	198	170	2007	7	13	0	176	9	0	0	0
LLAdda1306	1306	LL	LLAdd	Como	ComoComo20	198	170	2009	1	13	0	176	9	0	0	0												548.148
LLAdda1307	1307	LL	LLAdd	Como	ComoComo25	198	170	2007	7	10.8	7.1	200	5.4	0.912	32	20												33.333
LLAdda1308	1308	LL	LLAdd	Como	ComoDomaso	198	121	2009	1	0	0	0	0	0	0	0												29.6296				29.6296													14.8148
LLAdda1309	1309	LL	LLAdd	Como	ComoDomaso	198	121	2009	10	0	0	0	0	0	0	0												355.556				29.6296											14.8148		44.4444		14.8148
LLAdda1310	1310	LL	LLAdd	Como	ComoDomasoa	198	121	2009	1	0	0	0	0	0	0	0												88.8889				281.481
LLAdda1311	1311	LL	LLAdd	Como	ComoLaglio	198	170	2009	2	0	0	0	0	0	0	0												311.111
LLAdda1312	1312	LL	LLAdd	Como	ComoLecco	198	166	2004	4	17.61	6.63	234	9	0.644	59	75													37					5	3
LLAdda1313	1313	LL	LLAdd	Como	ComoLecco	198	166	2004	5	17.61	6.63	234	9	0.644	59	75	4											11	5
LLAdda1314	1314	LL	LLAdd	Como	ComoLecco	198	166	2004	7	17.61	6.63	234	9	0.644	59	75	17												6
LLAdda1315	1315	LL	LLAdd	Como	ComoLecco	198	166	2004	10	17.61	6.63	234	9	0.644	59	75	6												31.5
LLAdda1316	1316	LL	LLAdd	Como	ComoLecco	198	166	2006	11	17.61	6.63	234	9	0.644	59	75
LLAdda1317	1317	LL	LLAdd	Como	ComoLecco	198	166	2009	1	17.61	6.63	234	9	0.644	59	75												562.963
LLAdda1318	1318	LL	LLAdd	Como	ComoLeccoPare	198	166	2004	5	0	0	0	0	0	0	0
LLAdda1319	1319	LL	LLAdd	Como	ComoLeccoPare	198	166	2004	7	0	0	0	0	0	0	0
LLAdda1320	1320	LL	LLAdd	Como	ComoLenno	198	170	2009	3	0	0	0	0	0	0	0				15								29.6296																			14.8148
LLAdda1321	1321	LL	LLAdd	Como	ComoLennoa	198	170	2009	3	0	0	0	0	0	0	0												844.444														14.8148			14.8148
LLAdda1322	1322	LL	LLAdd	Como	ComoLierna	198	145	1984	11	18	0	176	9	0	41	0
LLAdda1323	1323	LL	LLAdd	Como	ComoLierna	198	145	1987	8	18	0	176	9	0	41	0																1
LLAdda1324	1324	LL	LLAdd	Como	ComoLierna	198	145	2007	7	18	0	176	9	0	41	0																											44.444
LLAdda1325	1325	LL	LLAdd	Como	ComoLierna	198	145	2009	4	18	0	176	9	0	41	0												518.519
LLAdda1326	1326	LL	LLAdd	Como	ComoLierna	198	145	2009	10	18	0	176	9	0	41	0												681.481																	14.8148
LLAdda1327	1327	LL	LLAdd	Como	ComoLierna10	198	145	2007	7	15	0	176	9	0	0	0
LLAdda1328	1328	LL	LLAdd	Como	ComoLierna15	198	145	2007	7	12	0	176	9	0	0	0
LLAdda1329	1329	LL	LLAdd	Como	ComoLierna5	198	145	2007	7	18	0	176	9	0	0	0
LLAdda1330	1330	LL	LLAdd	Como	ComoLiernaa	198	145	2007	7	14	0	176	9	0	0	0
LLAdda1331	1331	LL	LLAdd	Como	ComoMoregallo	198	140	2007	4	8	0	176	9	0	0	0
LLAdda1332	1332	LL	LLAdd	Como	ComoMoregallo15	198	140	2007	4	8	0	176	9	0	0	0
LLAdda1333	1333	LL	LLAdd	Como	ComoMoregallo20	198	140	2007	4	8	0	176	9	0	0	0
LLAdda1334	1334	LL	LLAdd	Como	ComoMoregallo25	198	140	2007	4	8	0	176	9	0	0	0
LLAdda1335	1335	LL	LLAdd	Como	ComoOnno05	198	137	1995	7	21	7.6	200	1	0.86	58	4	1																		8.074
LLAdda1336	1336	LL	LLAdd	Como	ComoOnno05	198	137	1995	8	21	7.6	200	1	0.86	58	4	1
LLAdda1337	1337	LL	LLAdd	Como	ComoOnno05	198	137	1995	9	21	7.6	200	1	0.86	58	4												1
LLAdda1338	1338	LL	LLAdd	Como	ComoOnno05	198	137	1995	10	21	7.6	200	1	0.86	58	4	1											1		1		1		1	1								1
LLAdda1339	1339	LL	LLAdd	Como	ComoOnno05	198	137	1995	11	21	7.6	200	1	0.86	58	4												1	1			1			1								1
LLAdda1340	1340	LL	LLAdd	Como	ComoOnno05	198	137	1995	12	21	7.6	200	1	0.86	58	4																										1				1
LLAdda1341	1341	LL	LLAdd	Como	ComoOnno05	198	137	1996	2	21	7.6	200	1	0.86	58	4																			1
LLAdda1342	1342	LL	LLAdd	Como	ComoOnno05	198	137	1996	3	21	7.6	200	1	0.86	58	4
LLAdda1343	1343	LL	LLAdd	Como	ComoOnno05	198	137	1996	4	21	7.6	200	1	0.86	58	4																		1	1
LLAdda1344	1344	LL	LLAdd	Como	ComoOnno05	198	137	1996	6	21	7.6	200	1	0.86	58	4												1				1		1	1
LLAdda1345	1345	LL	LLAdd	Como	ComoOnno05	198	137	1996	7	21	7.6	200	1	0.86	58	4	1												1			1			1
LLAdda1346	1346	LL	LLAdd	Como	ComoOnno05	198	137	1996	9	21	7.6	200	1	0.86	58	4	1											1																			1
LLAdda1347	1347	LL	LLAdd	Como	ComoOnno05	198	137	1997	9	21	7.6	200	1	0.86	58	4												11.111
LLAdda1348	1348	LL	LLAdd	Como	ComoOnno05	198	137	1997	10	21	7.6	200	1	0.86	58	4																		11.111
LLAdda1349	1349	LL	LLAdd	Como	ComoOnno05	198	137	1998	9	21	7.6	200	1	0.86	58	4
LLAdda1350	1350	LL	LLAdd	Como	ComoOssuccio	198	142	2004	6	25.5	7.4	219	9	0.66	41	0
LLAdda1351	1351	LL	LLAdd	Como	ComoOssuccio	198	142	2004	8	25.5	7.4	219	9	0.66	41	0	5												3
LLAdda1352	1352	LL	LLAdd	Como	ComoOssuccio	198	142	2005	1	25.5	7.4	219	9	0.66	41	0	5
LLAdda1353	1353	LL	LLAdd	Como	ComoOssuccio	198	142	2005	2	25.5	7.4	219	9	0.66	41	0	1												15
LLAdda1354	1354	LL	LLAdd	Como	ComoPare	198	165	2004	5	22.6	7.5	205	9	0	73	0	4											11	5
LLAdda1355	1355	LL	LLAdd	Como	ComoPare	198	165	2004	7	22.6	7.5	205	9	0	73	0	167												43													2	2				4
LLAdda1356	1356	LL	LLAdd	Como	ComoPiona	198	122	1980	7	12	6.6	200	8.5	0.86	41	4												1																			19.7239
LLAdda1357	1357	LL	LLAdd	Como	ComoPiona	198	122	1981	2	12	6.6	200	8.5	0.86	41	4												453.649
LLAdda1358	1358	LL	LLAdd	Como	ComoPiona	198	122	1981	3	12	6.6	200	8.5	0.86	41	4																		10.8619
LLAdda1359	1359	LL	LLAdd	Como	ComoPiona	198	122	1981	5	12	6.6	200	8.5	0.86	41	4					11.111													1
LLAdda1360	1360	LL	LLAdd	Como	ComoPiona	198	122	1981	9	12	6.6	200	8.5	0.86	41	4	19.7239											1.5
LLAdda1361	1361	LL	LLAdd	Como	ComoPiona	198	122	1981	11	12	6.6	200	8.5	0.86	41	4												1						7.24129
LLAdda1362	1362	LL	LLAdd	Como	ComoPiona	198	122	1982	1	12	6.6	200	8.5	0.86	41	4					15.4174							394.477						19.7239
LLAdda1363	1363	LL	LLAdd	Como	ComoPiona2	198	122	1980	5	18	6.1	176	9	0.65	0	0
LLAdda1364	1364	LL	LLAdd	Como	ComoPiona2	198	122	1980	7	18	6.1	176	9	0.65	0	0
LLAdda1365	1365	LL	LLAdd	Como	ComoPiona2	198	122	1981	2	18	6.1	176	9	0.65	0	0																		19.7239
LLAdda1366	1366	LL	LLAdd	Como	ComoPiona2	198	122	1981	3	18	6.1	176	9	0.65	0	0																		19.7239
LLAdda1367	1367	LL	LLAdd	Como	ComoPiona2	198	122	1981	5	18	6.1	176	9	0.65	0	0																		98.6193
LLAdda1368	1368	LL	LLAdd	Como	ComoPiona2	198	122	1981	9	18	6.1	176	9	0.65	0	0
LLAdda1369	1369	LL	LLAdd	Como	ComoPiona2	198	122	1981	11	18	6.1	176	9	0.65	0	0
LLAdda1370	1370	LL	LLAdd	Como	ComoPiona2	198	122	1982	1	18	6.1	176	9	0.65	0	0
LLAdda1371	1371	LL	LLAdd	Como	ComoPiona3	198	122	1980	7	18	6.3	176	9	0	0	0
LLAdda1372	1372	LL	LLAdd	Como	ComoPiona3	198	122	1981	2	18	6.3	176	9	0	0	0																		19.7239
LLAdda1373	1373	LL	LLAdd	Como	ComoPiona3	198	122	1981	3	18	6.3	176	9	0	0	0																		19.7239
LLAdda1374	1374	LL	LLAdd	Como	ComoPiona3	198	122	1981	9	18	6.3	176	9	0	0	0
LLAdda1375	1375	LL	LLAdd	Como	ComoPiona3	198	122	1981	11	18	6.3	176	9	0	0	0
LLAdda1376	1376	LL	LLAdd	Como	ComoPiona3	198	122	1982	1	18	6.3	176	9	0	0	0					19.7239													78.8955
LLAdda1377	1377	LL	LLAdd	Como	ComoPiona4	198	122	1980	7	13.5	6.6	176	9	0	0	0																			19.7239
LLAdda1378	1378	LL	LLAdd	Como	ComoPiona4	198	122	1981	2	13.5	6.6	176	9	0	0	0
LLAdda1379	1379	LL	LLAdd	Como	ComoPiona4	198	122	1981	3	13.5	6.6	176	9	0	0	0
LLAdda1380	1380	LL	LLAdd	Como	ComoPiona4	198	122	1981	11	13.5	6.6	176	9	0	0	0																		433.925
LLAdda1381	1381	LL	LLAdd	Como	ComoPiona4	198	122	1982	1	13.5	6.6	176	9	0	0	0																		1380.67
LLAdda1382	1382	LL	LLAdd	Como	ComoPiona6	198	122	1981	5	13.6	5.9	176	9	0	0	0
LLAdda1383	1383	LL	LLAdd	Como	ComoPiona6	198	122	1981	9	13.6	5.9	176	9	0	0	0
LLAdda1384	1384	LL	LLAdd	Como	ComoSSiro	198	170	2009	2	0	0	0	0	0	0	0												681.481																	133.333
LLAdda1385	1385	LL	LLAdd	Como	ComoSSiro	198	170	2009	10	0	0	0	0	0	0	0	14.8148											918.519																	133.333		14.8148
LLAdda1386	1386	LL	LLAdd	Como	ComoValmadrera	198	142	2007	5	13	0	176	9	0.7	0	0	11.111																									22.222	11.111				11.111
LLAdda1387	1387	LL	LLAdd	Como	ComoValmadrera10	198	142	2007	5	11	0	176	9	0	0	0																											11.111				11.111
LLAdda1388	1388	LL	LLAdd	Como	ComoValmadrera15	198	142	2007	5	12	0	176	9	0	0	0																11.111										22.222
LLAdda1389	1389	LL	LLAdd	Como	ComoValmadrera20	198	142	2007	5	11	0	176	9	0	0	0												11.111														11.111
LLAdda1390	1390	LL	LLAdd	Como	ComoValmadrera25	198	142	2007	5	11	0	176	9	0	0	0												11.111
LLAdda1391	1391	LL	LLAdd	Como	ComoVarenna10	198	145	2007	4	0	0	0	0	0	0	0
LLAdda1392	1392	LL	LLAdd	Como	ComoVarenna10	198	145	2007	5	0	0	0	0	0	0	0
LLAdda1393	1393	LL	LLAdd	Como	ComoVarenna20	198	125	2007	4	9	0	176	9	0	0	0
LLAdda1394	1394	LL	LLAdd	Como	ComoVassena	198	154	1996	2	0	0		0	0		0
LLAdda1395	1395	LL	LLAdd	Como	ComoVassena10	198	133.5	2007	5	0	0	0	0	0	0	0																										11.111					22.222
LLAdda1396	1396	LL	LLAdd	Como	ComoVassena15	198	133.5	2007	5	0	0	0	0	0	0	0																											11.111
LLAdda1397	1397	LL	LLAdd	Como	ComoVassena20	198	133.5	2007	5	0	0	0	0	0	0	0												11.111															11.111
LLAdda1398	1398	LL	LLAdd	Como	ComoVassena25	198	133.5	2007	5	0	0	0	0	0	0	0												11.111
LLAdda1399	1399	LL	LLAdd	Como	ComoVassena25a	198	133.5	2007	5	15	0	176	9	0	0	0												11.111
LLGerm1400	1400	LL	LLGer	ConstanceCH	ConstanceMH10	300		2004	3	0	0	0	0	0	0	0
LLGerm1401	1401	LL	LLGer	ConstanceGer	Bodenlt	300		1950	3	0	0	0	0	0	0	0
LLGerm1402	1402	LL	LLGer	ConstanceGer	Bodenlt	300		1962	3	0	0	0	0	0	0	0	1	1	1	1	1				1				1		1					1							1		1
LLGerm1403	1403	LL	LLGer	ConstanceGer	Bodenpr	300		1962	3	0	0	0	0	0	0	0												1				1		1			1
LLGerm1404	1404	LL	LLGer	ConstanceGer	Bodensl	300		1950	3	0	0	0	0	0	0	0
LLGerm1405	1405	LL	LLGer	ConstanceGer	Bodensl	300		1962	3	0	0	0	0	0	0	0									1				1						1		1					1	1			1	1
LLGerm1406	1406	LL	LLGer	ConstanceGer	Bodensl	300		1962	7	0	0	0	0	0	0	0
LLGerm1407	1407	LL	LLGer	ConstanceGer	ConstanceFC06	300		2004	3	0	0	0	0	0	0	0
LLGerm1408	1408	LL	LLGer	ConstanceGer	ConstanceFC08	300		2004	3	0	0	0	0	0	0	0
LLGerm1409	1409	LL	LLGer	ConstanceGer	ConstanceFC09	300		2004	3	0	0	0	0	0	0	0
LLGerm1410	1410	LL	LLGer	ConstanceGer	ConstanceFD06	300		2004	3	0	0	0	0	0	0	0
LLGerm1411	1411	LL	LLGer	ConstanceGer	ConstanceFD09	300		2004	3	0	0	0	0	0	0	0
LLGerm1412	1412	LL	LLGer	ConstanceGer	ConstanceFD11	300		2004	3	0	0	0	0	0	0	0
LLGerm1413	1413	LL	LLGer	ConstanceGer	ConstanceFD12	300		2004	3	0	0	0	0	0	0	0
LLGerm1414	1414	LL	LLGer	ConstanceGer	ConstanceFE05	300		2004	3	0	0	0	0	0	0	0
LLGerm1415	1415	LL	LLGer	ConstanceGer	ConstanceFE07	300		2004	3	0	0	0	0	0	0	0
LLGerm1416	1416	LL	LLGer	ConstanceGer	ConstanceFE10	300		2004	3	0	0	0	0	0	0	0
LLGerm1417	1417	LL	LLGer	ConstanceGer	ConstanceFF08	300		2004	3	0	0	0	0	0	0	0
LLGerm1418	1418	LL	LLGer	ConstanceGer	ConstanceFF10	300		2004	3	0	0	0	0	0	0	0
LLGerm1419	1419	LL	LLGer	ConstanceGer	ConstanceFG06	300		2004	3	0	0	0	0	0	0	0
LLGerm1420	1420	LL	LLGer	ConstanceGer	ConstanceFG09	300		2004	3	0	0	0	0	0	0	0
LLGerm1421	1421	LL	LLGer	ConstanceGer	ConstanceFG10	300		2004	3	0	0	0	0	0	0	0
LLGerm1422	1422	LL	LLGer	ConstanceGer	ConstanceFG11	300		2004	3	0	0	0	0	0	0	0
LLGerm1423	1423	LL	LLGer	ConstanceGer	ConstanceFH07	300		2004	3	0	0	0	0	0	0	0
LLGerm1424	1424	LL	LLGer	ConstanceGer	ConstanceFI02	300		2004	3	0	0	0	0	0	0	0
LLGerm1425	1425	LL	LLGer	ConstanceGer	ConstanceFI05	300		2004	3	0	0	0	0	0	0	0
LLGerm1426	1426	LL	LLGer	ConstanceGer	ConstanceFI07	300		2004	3	0	0	0	0	0	0	0
LLGerm1427	1427	LL	LLGer	ConstanceGer	ConstanceFI10	300		2004	3	0	0	0	0	0	0	0
LLGerm1428	1428	LL	LLGer	ConstanceGer	ConstanceHB06	300		2004	3	0	0	0	0	0	0	0
LLGerm1429	1429	LL	LLGer	ConstanceGer	ConstanceHB10	300		2004	3	0	0	0	0	0	0	0
LLGerm1430	1430	LL	LLGer	ConstanceGer	ConstanceHC03	300		2004	3	0	0	0	0	0	0	0
LLGerm1431	1431	LL	LLGer	ConstanceGer	ConstanceHC08	300		2004	3	0	0	0	0	0	0	0
LLGerm1432	1432	LL	LLGer	ConstanceGer	ConstanceHD05	300		2004	3	0	0	0	0	0	0	0
LLGerm1433	1433	LL	LLGer	ConstanceGer	ConstanceHG04	300		2004	3	0	0	0	0	0	0	0
LLGerm1434	1434	LL	LLGer	ConstanceGer	ConstanceHG06	300		2004	3	0	0	0	0	0	0	0
LLGerm1435	1435	LL	LLGer	ConstanceGer	ConstanceHG10	300		2004	3	0	0	0	0	0	0	0
LLGerm1436	1436	LL	LLGer	ConstanceGer	ConstanceHG12	300		2004	3	0	0	0	0	0	0	0
LLGerm1437	1437	LL	LLGer	ConstanceGer	ConstanceHH08	300		2004	3	0	0	0	0	0	0	0
LLGerm1438	1438	LL	LLGer	ConstanceGer	ConstanceHH13	300		2004	3	0	0	0	0	0	0	0
LLGerm1439	1439	LL	LLGer	ConstanceGer	ConstanceLC12	300		2004	3	0	0	0	0	0	0	0
LLGerm1440	1440	LL	LLGer	ConstanceGer	ConstanceMA05	300		2004	3	0	0	0	0	0	0	0
LLGerm1441	1441	LL	LLGer	ConstanceGer	ConstanceMA07	300		2004	3	0	0	0	0	0	0	0
LLGerm1442	1442	LL	LLGer	ConstanceGer	ConstanceMA09	300		2004	3	0	0	0	0	0	0	0
LLGerm1443	1443	LL	LLGer	ConstanceGer	ConstanceMA10	300		2004	3	0	0	0	0	0	0	0
LLGerm1444	1444	LL	LLGer	ConstanceGer	ConstanceMB06	300		2004	3	0	0	0	0	0	0	0
LLGerm1445	1445	LL	LLGer	ConstanceGer	ConstanceMB08	300		2004	3	0	0	0	0	0	0	0
LLGerm1446	1446	LL	LLGer	ConstanceGer	ConstanceMC02	300		2004	3	0	0	0	0	0	0	0
LLGerm1447	1447	LL	LLGer	ConstanceGer	ConstanceMC06	300		2004	3	0	0	0	0	0	0	0
LLGerm1448	1448	LL	LLGer	ConstanceGer	ConstanceMC10	300		2004	3	0	0	0	0	0	0	0
LLGerm1449	1449	LL	LLGer	ConstanceGer	ConstanceMC11	300		2004	3	0	0	0	0	0	0	0
LLGerm1450	1450	LL	LLGer	ConstanceGer	ConstanceMD02	300		2004	3	0	0	0	0	0	0	0
LLGerm1451	1451	LL	LLGer	ConstanceGer	ConstanceMD07	300		2004	3	0	0	0	0	0	0	0
LLGerm1452	1452	LL	LLGer	ConstanceGer	ConstanceMD10	300		2004	3	0	0	0	0	0	0	0
LLGerm1453	1453	LL	LLGer	ConstanceGer	ConstanceMD11	300		2004	3	0	0	0	0	0	0	0
LLGerm1454	1454	LL	LLGer	ConstanceGer	ConstanceME07	300		2004	3	0	0	0	0	0	0	0
LLGerm1455	1455	LL	LLGer	ConstanceGer	ConstanceMH09	300		2004	3	0	0	0	0	0	0	0
LLGerm1456	1456	LL	LLGer	ConstanceGer	ConstanceOA04	300		2004	3	0	0	0	0	0	0	0
LLGerm1457	1457	LL	LLGer	ConstanceGer	ConstanceOA05	300		2004	3	0	0	0	0	0	0	0
LLGerm1458	1458	LL	LLGer	ConstanceGer	ConstanceOA06	300		2004	3	0	0	0	0	0	0	0
LLGerm1459	1459	LL	LLGer	ConstanceGer	ConstanceOA10	300		2004	3	0	0	0	0	0	0	0
LLGerm1460	1460	LL	LLGer	ConstanceGer	ConstanceOA11	300		2004	3	0	0	0	0	0	0	0
LLGerm1461	1461	LL	LLGer	ConstanceGer	ConstanceOB02	300		2004	3	0	0	0	0	0	0	0
LLGerm1462	1462	LL	LLGer	ConstanceGer	ConstanceOB09	300		2004	3	0	0	0	0	0	0	0
LLGerm1463	1463	LL	LLGer	ConstanceGer	ConstanceOC02	300		2004	3	0	0	0	0	0	0	0
LLGerm1464	1464	LL	LLGer	ConstanceGer	ConstanceOC07	300		2004	3	0	0	0	0	0	0	0
LLGerm1465	1465	LL	LLGer	ConstanceGer	ConstanceOC09	300		2004	3	0	0	0	0	0	0	0
LLGerm1466	1466	LL	LLGer	ConstanceGer	ConstanceOD09	300		2004	3	0	0	0	0	0	0	0
LLGerm1467	1467	LL	LLGer	ConstanceGer	ConstanceOE02	300		2004	3	0	0	0	0	0	0	0
LLGerm1468	1468	LL	LLGer	ConstanceGer	ConstanceOE03	300		2004	3	0	0	0	0	0	0	0
LLGerm1469	1469	LL	LLGer	ConstanceGer	ConstanceOF02	300		2004	3	0	0	0	0	0	0	0																									123
LLGerm1470	1470	LL	LLGer	ConstanceGer	ConstanceOF05	300		2004	3	0	0	0	0	0	0	0																									123
LLGerm1471	1471	LL	LLGer	ConstanceGer	ConstanceOF10	300		2004	3	0	0	0	0	0	0	0																									246
LLGerm1472	1472	LL	LLGer	ConstanceGer	ConstanceOF11	300		2004	3	0	0	0	0	0	0	0																									123
LLGerm1473	1473	LL	LLGer	ConstanceGer	ConstanceOG02	300		2004	3	0	0	0	0	0	0	0
LLGerm1474	1474	LL	LLGer	ConstanceGer	ConstanceOG04	300		2004	3	0	0	0	0	0	0	0
LLGerm1475	1475	LL	LLGer	ConstanceGer	ConstanceOG05	300		2004	3	0	0	0	0	0	0	0
LLGerm1476	1476	LL	LLGer	ConstanceGer	ConstanceOG09	300		2004	3	0	0	0	0	0	0	0
LLGerm1477	1477	LL	LLGer	ConstanceGer	ConstanceUR02	300		2004	3	0	0	0	0	0	0	0																									123
LLGerm1478	1478	LL	LLGer	ConstanceGer	ConstanceUR10	300		2004	3	0	0	0	0	0	0	0																									123
LLGerm1479	1479	LL	LLGer	ConstanceGer	ConstanceUR11	300		2004	3	0	0	0	0	0	0	0
LLGerm1480	1480	LL	LLGer	ConstanceGer	ConstanceWB04	300		2004	3	0	0	0	0	0	0	0
LLGerm1481	1481	LL	LLGer	ConstanceGer	ConstanceWB06	300		2004	3	0	0	0	0	0	0	0
LLGerm1482	1482	LL	LLGer	ConstanceGer	ConstanceWD05	300		2004	3	0	0	0	0	0	0	0
LLGerm1483	1483	LL	LLGer	ConstanceGer	ConstanceWE02	300		2004	3	0	0	0	0	0	0	0
LLGerm1484	1484	LL	LLGer	ConstanceGer	ConstanceWE07	300		2004	3	0	0	0	0	0	0	0
LLOgli1485	1485	LL	LLOgl	Iseo	Iseo	185	92	2004	2	26	4.41	364	0.3	0.92	1088	20
LLOgli1486	1486	LL	LLOgl	Iseo	Iseo	185	92	2004	6	26	4.41	364	0.3	0.92	1088	20
LLOgli1487	1487	LL	LLOgl	Iseo	Iseo	185	92	2008	2	26	4.41	364	0.3	0.92	1088	20																22.2222															22.2222
LLOgli1488	1488	LL	LLOgl	Iseo	Iseo	185	92	2008	5	26	4.41	364	0.3	0.92	1088	20																88.8822											11.1111				466.62
LLOgli1489	1489	LL	LLOgl	Iseo	Iseo	185	92	2008	9	26	4.41	364	0.3	0.92	1088	20																11.1111											11.1111				44.4444
LLOgli1490	1490	LL	LLOgl	Iseo	IseoClusane	185	99	2004	1	0	0	0	0	0.469	80	0
LLOgli1491	1491	LL	LLOgl	Iseo	IseoClusane	185	99	2009	1	0	0	0	0	0.469	80	0												8.31028				1310.98															1755.38
LLOgli1492	1492	LL	LLOgl	Iseo	IseoEden	185	95	2009	1	0	0	0	0	0	0	0												8.5547				2955.26
LLOgli1493	1493	LL	LLOgl	Iseo	IseoPisogne	185	78	2008	12	0	0	0	0	0	0	0												30																			666.6
LLOgli1494	1494	LL	LLOgl	Iseo	IseoRdiSolto	185	85	2009	1	0	0	0	0	0	0	0												866.58																			444.4
LLOgli1495	1495	LL	LLOgl	Iseo	IseoSarnico	185	102	2004	1	18	7	330	4	0.68	80	3
LLOgli1496	1496	LL	LLOgl	Iseo	IseoSarnico	185	102	2004	2	18	7	330	4	0.68	80	3
LLOgli1497	1497	LL	LLOgl	Iseo	IseoSarnico	185	102	2004	3	18	7	330	4	0.68	80	3												1	5			4		1	14.6667
LLOgli1498	1498	LL	LLOgl	Iseo	IseoSarnico	185	102	2004	4	18	7	330	4	0.68	80	3															6	5		2
LLOgli1499	1499	LL	LLOgl	Iseo	IseoSarnico	185	102	2004	5	18	7	330	4	0.68	80	3			12												7	6		7	3												3	1
LLOgli1500	1500	LL	LLOgl	Iseo	IseoSarnico	185	102	2004	6	18	7	330	4	0.68	80	3												1	4						3
LLOgli1501	1501	LL	LLOgl	Iseo	IseoSarnico	185	102	2004	8	18	7	330	4	0.68	80	3
LLOgli1502	1502	LL	LLOgl	Iseo	IseoSarnico	185	102	2004	9	18	7	330	4	0.68	80	3																1
LLOgli1503	1503	LL	LLOgl	Iseo	IseoSiviano	185	90	2009	1	0	0	0	0	0	0	0																333.3
LLOgli1504	1504	LL	LLOgl	Iseo	IseoSulzano	185	100	2003	10	22	6.5	300	9	0.68	80	20																		3
LLOgli1505	1505	LL	LLOgl	Iseo	IseoSulzano	185	100	2003	11	22	6.5	300	9	0.68	80	20															2
LLOgli1506	1506	LL	LLOgl	Iseo	IseoSulzano	185	100	2003	12	22	6.5	300	9	0.68	80	20													2			1			3
LLOgli1507	1507	LL	LLOgl	Iseo	IseoSulzano	185	100	2004	1	22	6.5	300	9	0.68	80	20												1						1
LLOgli1508	1508	LL	LLOgl	Iseo	IseoSulzano	185	100	2004	2	22	6.5	300	9	0.68	80	20																											2
LLOgli1509	1509	LL	LLOgl	Iseo	IseoSulzano	185	100	2004	3	22	6.5	300	9	0.68	80	20																			20
LLOgli1510	1510	LL	LLOgl	Iseo	IseoSulzano	185	100	2004	8	22	6.5	300	9	0.68	80	20
LLOgli1511	1511	LL	LLOgl	Iseo	IseoTavernola	185	102	2009	1	0	0	330	0.34	0.469	80	86												1977.58				333.3
LLOgli1512	1512	LL	LLOgl	Iseo	IseoZorzino	185	102	2004	6	0	0	338	0.34	0.469	116	71
LLSarc1513	1513	LL	LLSar	GardaBS	Garda04Torbole20	65	106	1970	11	17	7.8	296	9.3	0.42	30	62																61															15
LLSarc1514	1514	LL	LLSar	GardaBS	Garda04Torbole20	65	106	1971	2	17	7.8	296	9.3	0.42	30	62																54										7					7
LLSarc1515	1515	LL	LLSar	GardaBS	Garda04Torbole20	65	106	1971	4	17	7.8	296	9.3	0.42	30	62																										13					7
LLSarc1516	1516	LL	LLSar	GardaBS	Garda04Torbole20	65	106	1971	6	17	7.8	296	9.3	0.42	30	62																249										4
LLSarc1517	1517	LL	LLSar	GardaBS	Garda04Torbole20	65	106	1971	9	17	7.8	296	9.3	0.42	30	62																6										28	17				48
LLSarc1518	1518	LL	LLSar	GardaBS	Garda04Torbole50	65	73	1970	11	0	0	242	9.4	0.349	30	0																127										7
LLSarc1519	1519	LL	LLSar	GardaBS	Garda04Torbole50	65	73	1971	2	0	0	242	9.4	0.349	30	0																27
LLSarc1520	1520	LL	LLSar	GardaBS	Garda04Torbole50	65	73	1971	4	0	0	242	9.4	0.349	30	0																26
LLSarc1521	1521	LL	LLSar	GardaBS	Garda04Torbole50	65	73	1971	6	0	0	242	9.4	0.349	30	0																50										5
LLSarc1522	1522	LL	LLSar	GardaBS	Garda04Torbole50	65	73	1971	9	0	0	242	9.4	0.349	30	0																87										7			7			13
LLSarc1523	1523	LL	LLSar	GardaBS	Garda04Torbolelit	65	73	1971	2	10	7.94	242	9.4	0.349	37.5	180												7
LLSarc1524	1524	LL	LLSar	GardaBS	Garda04Torbolelit	65	73	1971	6	10	7.94	242	9.4	0.349	37.5	180												24
LLSarc1525	1525	LL	LLSar	GardaBS	Garda04Torbolelit	65	73	1971	9	10	7.94	242	9.4	0.349	37.5	180												14
LLSarc1526	1526	LL	LLSar	GardaBS	Garda09bTignale10a	65	92	2007	6	19	0	242	9.4	0.349	30	0
LLSarc1527	1527	LL	LLSar	GardaBS	Garda09Tignale10	65	92	2007	6	0	0	0	0	0	0	0
LLSarc1528	1528	LL	LLSar	GardaBS	Garda09Tignale10b	65	92	2007	6	19	0	242	9.4	0.349	30	0
LLSarc1529	1529	LL	LLSar	GardaBS	Garda09Tignale15	65	92	2007	6	0	0	0	0	0	0	0
LLSarc1530	1530	LL	LLSar	GardaBS	Garda09Tignale20	65	92	2007	6	0	0	0	0	0	0	0
LLSarc1531	1531	LL	LLSar	GardaBS	Garda09Tignale5	65	92	2007	6	19	0	242	9.4	0.349	30	0
LLSarc1532	1532	LL	LLSar	GardaBS	Garda10Gargnano	65	97	2007	5	14	0	0	0	0	0	0																															27.7775
LLSarc1533	1533	LL	LLSar	GardaBS	Garda13Toscolano15	65	101	2004	7	14	0	242	9.4	0.349	30	0
LLSarc1534	1534	LL	LLSar	GardaBS	Garda13Toscolano15	65	101	2007	6	14	0	242	9.4	0.349	30	0
LLSarc1535	1535	LL	LLSar	GardaBS	Garda13Toscolano20	65	101	1970	11	10	0	242	9.4	0.349	30	0																14
LLSarc1536	1536	LL	LLSar	GardaBS	Garda13Toscolano20	65	101	1971	2	10	0	242	9.4	0.349	30	0																93
LLSarc1537	1537	LL	LLSar	GardaBS	Garda13Toscolano20	65	101	1971	4	10	0	242	9.4	0.349	30	0																27
LLSarc1538	1538	LL	LLSar	GardaBS	Garda13Toscolano20	65	101	1971	6	10	0	242	9.4	0.349	30	0																										5
LLSarc1539	1539	LL	LLSar	GardaBS	Garda13Toscolano20	65	101	1971	9	10	0	242	9.4	0.349	30	0																20
LLSarc1540	1540	LL	LLSar	GardaBS	Garda13Toscolano20	65	101	2007	4	10	0	242	9.4	0.349	30	0
LLSarc1541	1541	LL	LLSar	GardaBS	Garda13Toscolano20	65	101	2007	6	10	0	242	9.4	0.349	30	0
LLSarc1542	1542	LL	LLSar	GardaBS	Garda19Manerba	65	112	2003	7	0	0		0	0		0
LLSarc1543	1543	LL	LLSar	GardaBS	Garda19Manerba	65	112	2003	8	0	0		0	0		0																5
LLSarc1544	1544	LL	LLSar	GardaBS	Garda19Manerba	65	112	2011	4	0	0		0	0		0												77.77															22.22
LLSarc1545	1545	LL	LLSar	GardaBS	Garda19Manerba	65	112	2011	7	0	0		0	0		0																22.22															22.22
LLSarc1546	1546	LL	LLSar	GardaBS	Garda19Manerba35	65	112	1970	11	12	0	242	9.4	0.349	30	0
LLSarc1547	1547	LL	LLSar	GardaBS	Garda29BacinoIsole30	65	112	1971	2	0	8.1	226	0	0.38	11	0												89				10
LLSarc1548	1548	LL	LLSar	GardaBS	Garda29BacIsole50	65	112	1971	2	8.4	8.1	242	9.4	0.349	30	2												10
LLSarc1549	1549	LL	LLSar	GardaBS	Garda40Desenzano10	65	122	1971	6	17	8.1	242	7.6	0.349	30	19.8												108				108
LLSarc1550	1550	LL	LLSar	GardaBS	Garda40Desenzano20	65	122	1971	6	17	7.8	242	9.3	0.349	30	19.8																30
LLSarc1551	1551	LL	LLSar	GardaBS	Garda40Desenzano30	65	122	1971	6	17	8.1	242	7.6	0.349	30	19.8																10
LLSarc1552	1552	LL	LLSar	GardaBS	Garda40Desenzano50	65	122	1970	11	0	0	242	9.4	0.349	30	0												7				155
LLSarc1553	1553	LL	LLSar	GardaBS	Garda40Desenzano50	65	122	1971	2	0	0	242	9.4	0.349	30	0												7				152
LLSarc1554	1554	LL	LLSar	GardaBS	Garda40Desenzano50	65	122	1971	4	0	0	242	9.4	0.349	30	0
LLSarc1555	1555	LL	LLSar	GardaBS	Garda40Desenzano50	65	122	1971	6	0	0	242	9.4	0.349	30	0												5				49
LLSarc1556	1556	LL	LLSar	GardaBS	Garda40Desenzano50	65	122	1971	9	0	0	242	9.4	0.349	30	0																137										3						3
LLSarc1557	1557	LL	LLSar	GardaBS	Garda45Sirmione	65	112	1982	6	0	0	242	9.4	0.349	30	0
LLSarc1558	1558	LL	LLSar	GardaBS	Garda45Sirmione	65	112	2003	8	0	0	242	9.4	0.349	30	0																										4
LLSarc1559	1559	LL	LLSar	GardaBS	Garda45Sirmione	65	112	2004	3	0	0	242	9.4	0.349	30	0																2
LLSarc1560	1560	LL	LLSar	GardaBS	Garda46GrotteCatullo	65	73	1971	6	0	0	242	9.4	0.349	30	0												99				59
LLSarc1561	1561	LL	LLSar	GardaBS	GardaBacinoIsole29_15	65	112	1971	2	6	7.85	242	9.4	0.349	30	2												99				208
LLSarc1562	1562	LL	LLSar	GardaBS	GardaDesenzano40	65	122	1971	6	19.98	7.01	296	7.6	0.349	30	0												10
LLSarc1563	1563	LL	LLSar	GardaBS	GardaDesenzano40	65	122	1971	9	19.98	7.01	296	7.6	0.349	30	0												13
LLSarc1564	1564	LL	LLSar	GardaBS	GardaDesenzano40	65	122	2004	3	19.98	7.01	296	7.6	0.349	30	0																4
LLSarc1565	1565	LL	LLSar	GardaBS	GardaDesenzano40	65	122	2004	6	19.98	7.01	296	7.6	0.349	30	0			1									1	16.5			25		13								6					24.5	2
LLSarc1566	1566	LL	LLSar	GardaBS	GardaDesenzano40	65	122	2004	7	19.98	7.01	296	7.6	0.349	30	0													1			17										1	1				14
LLSarc1567	1567	LL	LLSar	GardaBS	GardaDesenzano40	65	122	2011	4	19.98	7.01	296	7.6	0.349	30	0												22.22
LLSarc1568	1568	LL	LLSar	GardaBS	GardaDesenzano40	65	122	2011	7	19.98	7.01	296	7.6	0.349	30	0
LLSarc1569	1569	LL	LLSar	GardaBS	GardaGrotteCatullo47	65	122	1971	6	17	8.1	242	9.3	0.349	30	19.8																20
LLSarc1570	1570	LL	LLSar	GardaBS	GardaManerba19b05b	65	112	2004	7	0	0	242	9.4	0.349	30	0
LLSarc1571	1571	LL	LLSar	GardaBS	GardaPadenghe21	65	122	1971	6	17	7.8	242	9.3	0.349	30	19.8												49
LLSarc1572	1572	LL	LLSar	GardaBS	GardaPadenghe21	65	122	2004	6	17	7.8	242	9.3	0.349	30	19.8			32																							4						2
LLSarc1573	1573	LL	LLSar	GardaBS	GardaPadenghe2110	65	122	1971	6	17	7.8	242	7.6	0.349	30	19.8																															10
LLSarc1574	1574	LL	LLSar	GardaBS	GardaPadenghe21100	65	122	1971	2	8.4	8.1	242	7.6	0.349	30	80																20
LLSarc1575	1575	LL	LLSar	GardaBS	GardaPadenghe21100	65	122	1971	6	8.4	8.1	242	7.6	0.349	30	80																50
LLSarc1576	1576	LL	LLSar	GardaBS	GardaPadenghe2120	65	112	1971	6	0	0	0	0	0	0	0												168				464
LLSarc1577	1577	LL	LLSar	GardaBS	GardaPadenghe2130	65	112	1971	6	0	0	0	0	0	0	0												20				621											20
LLSarc1578	1578	LL	LLSar	GardaBS	GardaPadenghe2150	65	122	1971	6	6	7.85	242	7.6	0.349	30	80																10															20
LLSarc1579	1579	LL	LLSar	GardaBS	GardaPeschiera50	600	250	1970	11	18.4	7.55	327	7.6	1.6	85	350
LLSarc1580	1580	LL	LLSar	GardaBS	GardaPeschiera50	600	250	1971	2	18.4	7.55	327	7.6	1.6	85	350												15				47.3333										10
LLSarc1581	1581	LL	LLSar	GardaBS	GardaPeschiera50	600	250	1971	4	18.4	7.55	327	7.6	1.6	85	350																13
LLSarc1582	1582	LL	LLSar	GardaBS	GardaPeschiera50	600	250	1971	6	18.4	7.55	327	7.6	1.6	85	350
LLSarc1583	1583	LL	LLSar	GardaBS	GardaPeschiera50	600	250	1971	9	18.4	7.55	327	7.6	1.6	85	350																27
LLSarc1584	1584	LL	LLSar	GardaBS	GardaPeschiera50	600	250	2004	3	18.4	7.55	327	7.6	1.6	85	350												2	93			4
LLSarc1585	1585	LL	LLSar	GardaBS	GardaPeschiera50	600	250	2004	9	18.4	7.55	327	7.6	1.6	85	350													1			9			5												2
LLSarc1586	1586	LL	LLSar	GardaBS	GardaPeschiera50	600	250	2004	12	18.4	7.55	327	7.6	1.6	85	350													2.5					2	1.5
LLSarc1587	1587	LL	LLSar	GardaBS	GardaSirmione46	65	122	2003	8	17	7	242	7.6	0.349	30	19.8
LLSarc1588	1588	LL	LLSar	GardaBS	GardaSirmione46	65	122	2004	3	17	7	242	7.6	0.349	30	19.8													93
LLSarc1589	1589	LL	LLSar	GardaBS	GardaToscolano12	65	101	1971	2	26	7.01	296	7.7	0.349	30	0												7
LLSarc1590	1590	LL	LLSar	GardaBS	GardaToscolano12	65	101	1971	4	26	7.01	296	7.7	0.349	30	0
LLSarc1591	1591	LL	LLSar	GardaBS	GardaToscolano12	65	101	1971	6	26	7.01	296	7.7	0.349	30	0												10
LLSarc1592	1592	LL	LLSar	GardaBS	GardaToscolano12	65	101	2000	7	26	7.01	296	7.7	0.349	30	0																2
LLSarc1593	1593	LL	LLSar	GardaBS	GardaToscolano12	65	101	2004	6	26	7.01	296	7.7	0.349	30	0			1									1	16.5			25		13								6					24.5
LLSarc1594	1594	LL	LLSar	GardaBS	GardaToscolano12	65	101	2004	7	26	7.01	296	7.7	0.349	30	0													1			17										1	1				14
LLSarc1595	1595	LL	LLSar	GardaBS	GardaToscolano12	65	101	2007	4	26	7.01	296	7.7	0.349	30	0																										11.111
LLSarc1596	1596	LL	LLSar	GardaBS	GardaToscolano1210	65	101	2007	4	14	0	242	9.4	0.349	30	0																11.111
LLSarc1597	1597	LL	LLSar	GardaBS	GardaToscolano1210	65	101	2007	6	14	0	242	9.4	0.349	30	0																															11.111
LLSarc1598	1598	LL	LLSar	GardaBS	GardaToscolano12100	65	101	1970	11	12	0	242	9.4	0.349	30	0																40										7
LLSarc1599	1599	LL	LLSar	GardaBS	GardaToscolano12100	65	101	1971	2	12	0	242	9.4	0.349	30	0																204
LLSarc1600	1600	LL	LLSar	GardaBS	GardaToscolano12100	65	101	1971	4	12	0	242	9.4	0.349	30	0																144
LLSarc1601	1601	LL	LLSar	GardaBS	GardaToscolano12100	65	101	1971	6	12	0	242	9.4	0.349	30	0																50
LLSarc1602	1602	LL	LLSar	GardaBS	GardaToscolano12100	65	101	1971	9	12	0	242	9.4	0.349	30	0																118										62					7
LLSarc1603	1603	LL	LLSar	GardaBS	GardaToscolano1215	65	101	2004	7	12	0	242	9.4	0.349	30	0
LLSarc1604	1604	LL	LLSar	GardaBS	GardaToscolano1215	65	101	2007	4	12	0	242	9.4	0.349	30	0																															11.111
LLSarc1605	1605	LL	LLSar	GardaBS	GardaToscolano1215	65	101	2007	6	12	0	242	9.4	0.349	30	0
LLSarc1606	1606	LL	LLSar	GardaBS	GardaToscolano1220	65	101	2007	4	0	0	242	9.4	0.349	30	0
LLSarc1607	1607	LL	LLSar	GardaBS	GardaToscolano1220	65	101	2007	6	0	0	242	9.4	0.349	30	0
LLSarc1608	1608	LL	LLSar	GardaBS	GardaToscolano12200	65	101	1971	2	7	8.1	242	7.6	0.392	30	180																54
LLSarc1609	1609	LL	LLSar	GardaBS	GardaToscolano12200	65	101	1971	4	7	8.1	242	7.6	0.392	30	180																14										7
LLSarc1610	1610	LL	LLSar	GardaBS	GardaToscolano12200	65	101	1971	6	7	8.1	242	7.6	0.392	30	180																20
LLSarc1611	1611	LL	LLSar	GardaBS	GardaToscolano12200	65	101	1971	9	7	8.1	242	7.6	0.392	30	180											25															10
LLSarc1612	1612	LL	LLSar	GardaBS	GardaToscolano1225	65	101	2007	4	11	0	242	9.4	0.349	30	0
LLSarc1613	1613	LL	LLSar	GardaTN	Garda	65	70	1999	2	19.7	7.59	242	7.6	1.2	30	180
LLSarc1614	1614	LL	LLSar	GardaTN	Garda	65	70	2007	6	19.7	7.59	242	7.6	1.2	30	180																										11.111
LLSarc1615	1615	LL	LLSar	GardaTN	Garda	65	70	2007	8	19.7	7.59	242	7.6	1.2	30	180
LLSarc1616	1616	LL	LLSar	GardaTN	Garda	65	70	2008	4	19.7	7.59	242	7.6	1.2	30	180
LLSarc1617	1617	LL	LLSar	GardaTN	Garda02Riva100	65	73	1970	11	8.4	7.8	242	7.6	0.349	30	180																311										7
LLSarc1618	1618	LL	LLSar	GardaTN	Garda02Riva100	65	73	1971	2	8.4	7.8	242	7.6	0.349	30	180												15				185
LLSarc1619	1619	LL	LLSar	GardaTN	Garda02Riva100	65	73	1971	4	8.4	7.8	242	7.6	0.349	30	180											132					13
LLSarc1620	1620	LL	LLSar	GardaTN	Garda02Riva100	65	73	1971	6	8.4	7.8	242	7.6	0.349	30	180												15				54
LLSarc1621	1621	LL	LLSar	GardaTN	Garda02Riva100	65	73	1971	9	8.4	7.8	242	7.6	0.349	30	180																40
LLSarc1622	1622	LL	LLSar	GardaTN	Garda02Riva50	65	73	1971	4	8	7.94	242	9.4	0.349	30	180																39
LLSarc1623	1623	LL	LLSar	GardaTN	Garda03Riva100	65	73	1971	2	6.5	7.8	242	7.6	0.349	30	180																292.5
LLSarc1624	1624	LL	LLSar	GardaTN	Garda03Riva100	65	73	1971	6	6.5	7.8	242	7.6	0.349	30	180																15
LLSarc1625	1625	LL	LLSar	GardaTN	Garda10Pai15	65	97	2007	5	14	0	0	0	0	0	0
LLSarc1626	1626	LL	LLSar	GardaTN	Garda10Pai20	65	97	2007	5	0	0	0	0	0	0	0																															44.444
LLSarc1627	1627	LL	LLSar	GardaTN	Garda10Pai20	65	97	2010	11	0	0	0	0	0	0	0
LLSarc1628	1628	LL	LLSar	GardaTN	Garda10Pai20	65	97	2010	12	0	0	0	0	0	0	0																															1
LLSarc1629	1629	LL	LLSar	GardaTN	Garda10Pai20b	65	97	2007	5	14	0	0	0	0	0	0
LLSarc1630	1630	LL	LLSar	GardaTN	Garda10Pai20b	65	97	2010	11	14	0	0	0	0	0	0
LLSarc1631	1631	LL	LLSar	GardaTN	Garda10Pai25	65	97	2007	5	14	0	0	0	0	0	0
LLSarc1632	1632	LL	LLSar	GardaTN	Garda10Pai5	65	97	2007	5	14	0	0	0	0	0	0
LLSarc1633	1633	LL	LLSar	GardaTN	Garda10Pai5	65	97	2010	11	14	0	0	0	0	0	0
LLSarc1634	1634	LL	LLSar	GardaTN	GardaRiva01	65	70	1970	11	22	7.55	242	7.6	0.42	30	80												7				7
LLSarc1635	1635	LL	LLSar	GardaTN	GardaRiva01	65	70	1971	2	22	7.55	242	7.6	0.42	30	80											27	7				20
LLSarc1636	1636	LL	LLSar	GardaTN	GardaRiva01	65	70	1971	4	22	7.55	242	7.6	0.42	30	80																33
LLSarc1637	1637	LL	LLSar	GardaTN	GardaRiva01	65	70	1971	6	22	7.55	242	7.6	0.42	30	80
LLSarc1638	1638	LL	LLSar	GardaTN	GardaRiva01	65	70	2004	9	22	7.55	242	7.6	0.42	30	80													1			9			5												2
LLSarc1639	1639	LL	LLSar	GardaTN	GardaRiva01	65	70	2004	12	22	7.55	242	7.6	0.42	30	80													2.5			2		2	1.5
LLSarc1640	1640	LL	LLSar	GardaTN	GardaRiva01	65	70	2007	8	22	7.55	242	7.6	0.42	30	80												11.111																			11.111
LLSarc1641	1641	LL	LLSar	GardaTN	GardaTorriBenaco32	65	112	2007	6	10	7.84	242	0.32	0.4	30	2												11.111
LLSarc1642	1642	LL	LLSar	GardaTN	GardaTorriBenaco32	65	112	2008	4	10	7.84	242	0.32	0.4	30	2
LLSarc1643	1643	LL	LLSar	GardaTN	GardaTorriBenaco32	65	112	2010	10	10	7.84	242	0.32	0.4	30	2
LLSarc1644	1644	LL	LLSar	GardaTN	GardaTorriBenaco32	65	112	2010	11	10	7.84	242	0.32	0.4	30	2
LLSarc1645	1645	LL	LLSar	GardaVR	Garda05Limone10	65	90	2007	6	16	0	242	9.4	0.349	30	0
LLSarc1646	1646	LL	LLSar	GardaVR	Garda05Limone10b	65	90	2007	6	16	0	242	9.4	0.349	30	0
LLSarc1647	1647	LL	LLSar	GardaVR	Garda05Limone15	65	90	2007	6	13	0	242	9.4	0.349	30	0
LLSarc1648	1648	LL	LLSar	GardaVR	Garda05Limone15b	65	90	2007	6	13	0	242	9.4	0.349	30	0																													11.111
LLSarc1649	1649	LL	LLSar	GardaVR	Garda05Limone20	65	90	2007	6	12	0	242	9.4	0.349	30	0
LLSarc1650	1650	LL	LLSar	GardaVR	Garda05Limone25	65	90	2007	6	11	0	242	9.4	0.349	30	0
LLSarc1651	1651	LL	LLSar	GardaVR	Garda05Limone25b	65	90	2007	6	11	0	242	9.4	0.349	30	0
LLSarc1652	1652	LL	LLSar	GardaVR	Garda05Limone5	65	90	2007	6	18	0	242	9.4	0.349	30	0
LLSarc1653	1653	LL	LLSar	GardaVR	Garda05Limonelit	65	101	2007	6	10	0	242	9.4	0.349	30	0
LLSarc1654	1654	LL	LLSar	GardaVR	Garda08Malcesine250	65	85	1971	2	10	7.5	242	7.6	0.408	30	180												7
LLSarc1655	1655	LL	LLSar	GardaVR	Garda08Malcesine250	65	85	1971	4	10	7.5	242	7.6	0.408	30	180
LLSarc1656	1656	LL	LLSar	GardaVR	Garda08Malcesine300	65	85	1970	11	6	7.59	242	7.6	0.408	30	180																46
LLSarc1657	1657	LL	LLSar	GardaVR	Garda08Malcesine300	65	85	1971	2	6	7.59	242	7.6	0.408	30	180																15
LLSarc1658	1658	LL	LLSar	GardaVR	Garda08Malcesine300	65	85	1971	4	6	7.59	242	7.6	0.408	30	180																										7
LLSarc1659	1659	LL	LLSar	GardaVR	Garda08Malcesine300	65	85	1971	6	6	7.59	242	7.6	0.408	30	180																13
LLSarc1660	1660	LL	LLSar	GardaVR	Garda08Malcesine300	65	85	1971	9	6	7.59	242	7.6	0.408	30	180																36										4
LLSarc1661	1661	LL	LLSar	GardaVR	Garda08vMalcesine350	65	85	1970	11	0	0	242	9.4	0.349	30	0
LLSarc1662	1662	LL	LLSar	GardaVR	Garda08vMalcesine350	65	85	1971	2	0	0	242	9.4	0.349	30	0
LLSarc1663	1663	LL	LLSar	GardaVR	Garda08vMalcesine350	65	85	1971	6	0	0	242	9.4	0.349	30	0																14
LLSarc1664	1664	LL	LLSar	GardaVR	Garda08vMalcesine350	65	85	1971	9	0	0	242	9.4	0.349	30	0																16
LLSarc1665	1665	LL	LLSar	GardaVR	Garda14SVigilio25	65	112	1970	11	16	0	0	0	0	0	0
LLSarc1666	1666	LL	LLSar	GardaVR	Garda17bSaloTavine05b	65	113	1982	7	15	0	242	9.4	0.349	30	0
LLSarc1667	1667	LL	LLSar	GardaVR	Garda17bSaloTavine15b	65	113	1982	7	9	0	242	9.4	0.349	30	0
LLSarc1668	1668	LL	LLSar	GardaVR	Garda18Salo120	65	113	1970	11	8.4	7.8	242	9.4	0.349	30	180																50
LLSarc1669	1669	LL	LLSar	GardaVR	Garda18Salo120	65	113	1982	5	8.4	7.8	242	9.4	0.349	30	180												333.3
LLSarc1670	1670	LL	LLSar	GardaVR	Garda18Salo120	65	113	2007	5	8.4	7.8	242	9.4	0.349	30	180																															11.111
LLSarc1671	1671	LL	LLSar	GardaVR	garda1H	65	112	2010	12	0	0	0	0	0	0	0
LLSarc1672	1672	LL	LLSar	GardaVR	Garda33SVigilio035	65	112	1970	11	8	7.8	242	9.4	0.349	30	19.8																59
LLSarc1673	1673	LL	LLSar	GardaVR	Garda34Garda020	65	112	1971	4	0	0	242	9.4	0.349	30	0																59.5
LLSarc1674	1674	LL	LLSar	GardaVR	Garda34Garda50	65	112	1971	4	6	7.85	242	9.4	0.349	30	2
LLSarc1675	1675	LL	LLSar	GardaVR	Garda34Gargnano	65	112	1971	4	6	7.9	242	7.6	0.42	30	2												79
LLSarc1676	1676	LL	LLSar	GardaVR	Garda36chir	65	106	1970	11	8.4	7.8	242	9.4	0.349	30	19.8																30
LLSarc1677	1677	LL	LLSar	GardaVR	Garda36chir	65	106	1971	2	8.4	7.8	242	9.4	0.349	30	19.8												7
LLSarc1678	1678	LL	LLSar	GardaVR	Garda36PaldVo50	65	106	1970	11	8	7.85	242	7.6	0.349	30	180												7				105
LLSarc1679	1679	LL	LLSar	GardaVR	Garda36PaldVo50	65	106	1971	2	8	7.85	242	7.6	0.349	30	180												7				1597																7
LLSarc1680	1680	LL	LLSar	GardaVR	Garda36PaldVo50	65	106	1971	4	8	7.85	242	7.6	0.349	30	180												10				42
LLSarc1681	1681	LL	LLSar	GardaVR	Garda36PaldVo50	65	106	1971	6	8	7.85	242	7.6	0.349	30	180																104
LLSarc1682	1682	LL	LLSar	GardaVR	Garda36PaldVo50	65	106	1971	9	8	7.85	242	7.6	0.349	30	180																5
LLSarc1683	1683	LL	LLSar	GardaVR	Garda36PaldVo80	65	106	1970	11	7	7.8	242	7.6	0.349	30	180												7				237
LLSarc1684	1684	LL	LLSar	GardaVR	Garda36PaldVo80	65	106	1971	2	7	7.8	242	7.6	0.349	30	180																7
LLSarc1685	1685	LL	LLSar	GardaVR	Garda36PaldVo80	65	106	1971	4	7	7.8	242	7.6	0.349	30	180																92
LLSarc1686	1686	LL	LLSar	GardaVR	Garda36PaldVo80	65	106	1971	6	7	7.8	242	7.6	0.349	30	180																44
LLSarc1687	1687	LL	LLSar	GardaVR	Garda36PaldVo80	65	106	1971	9	7	7.8	242	7.6	0.349	30	180																55
LLSarc1688	1688	LL	LLSar	GardaVR	GardaCentrolago31	65	112	1999	2	0	0	0	0	0	0	0
LLSarc1689	1689	LL	LLSar	GardaVR	GardaCentrolago31	65	112	2008	4	0	0	0	0	0	0	0
LLSarc1690	1690	LL	LLSar	GardaVR	GardaFasano17	65	113	1982	5	24.5	7.16	311	1	0.349	30	19.8																666.6
LLSarc1691	1691	LL	LLSar	GardaVR	GardaFasano17	65	113	1982	7	24.5	7.16	311	1	0.349	30	19.8												2977.48				2977.48															333.3	511.06
LLSarc1692	1692	LL	LLSar	GardaVR	GardaFasano17	65	113	1982	10	24.5	7.16	311	1	0.349	30	19.8
LLSarc1693	1693	LL	LLSar	GardaVR	GardaFasano17	65	113	2004	6	24.5	7.16	311	1	0.349	30	19.8
LLSarc1694	1694	LL	LLSar	GardaVR	GardaFasano17	65	113	2007	4	24.5	7.16	311	1	0.349	30	19.8
LLSarc1695	1695	LL	LLSar	GardaVR	GardaSalo17	65	113	1982	10	19.98	7.16	311	9.5	0	0	0
LLSarc1696	1696	LL	LLSar	GardaVR	GardaSalo17	65	113	2008	4	19.98	7.16	311	9.5	0	0	0																															11.111
LLSarc1697	1697	LL	LLSar	GardaVR	GardaSalo17100	65	113	1970	11	8.4	7.8	242	9.4	0.349	30	180																168
LLSarc1698	1698	LL	LLSar	GardaVR	GardaSalo1710b	65	113	1971	4	19	7.3	242	8.8	0.349	30	80																50
LLSarc1699	1699	LL	LLSar	GardaVR	GardaSalo1710b	65	113	2007	4	19	7.3	242	8.8	0.349	30	80
LLSarc1700	1700	LL	LLSar	GardaVR	GardaSalo1710b	65	113	2007	5	19	7.3	242	8.8	0.349	30	80
LLSarc1701	1701	LL	LLSar	GardaVR	GardaSalo1720	65	113	2007	4	19	7.8	242	7.7	0.349	30	19.8
LLSarc1702	1702	LL	LLSar	GardaVR	GardaSalo1720	65	113	2007	6	19	7.8	242	7.7	0.349	30	19.8
LLSarc1703	1703	LL	LLSar	GardaVR	GardaSalo1720b	65	90	1982	5	12	0	242	9.4	0.349	30	0
LLSarc1704	1704	LL	LLSar	GardaVR	GardaSalo1720b	65	90	1982	10	12	0	242	9.4	0.349	30	0
LLSarc1705	1705	LL	LLSar	GardaVR	GardaSalo1725	65	113	1970	11	8	7.8	242	9.3	0.349	30	19.8												555				585
LLSarc1706	1706	LL	LLSar	GardaVR	GardaSalo1725	65	113	1981	11	8	7.8	242	9.3	0.349	30	19.8												555.5																			555.5
LLSarc1707	1707	LL	LLSar	GardaVR	GardaSalo1725	65	113	1982	3	8	7.8	242	9.3	0.349	30	19.8
LLSarc1708	1708	LL	LLSar	GardaVR	GardaSalo1725	65	113	1982	5	8	7.8	242	9.3	0.349	30	19.8																2488.64															488.84
LLSarc1709	1709	LL	LLSar	GardaVR	GardaSalo1725	65	113	1982	7	8	7.8	242	9.3	0.349	30	19.8												3844.06				2310.88															1155.44	344.41
LLSarc1710	1710	LL	LLSar	GardaVR	GardaSalo1725	65	113	1982	10	8	7.8	242	9.3	0.349	30	19.8												666.6				696.6
LLSarc1711	1711	LL	LLSar	GardaVR	GardaSalo1725	65	113	2007	4	8	7.8	242	9.3	0.349	30	19.8																															11.111
LLSarc1712	1712	LL	LLSar	GardaVR	GardaSalo1725b	65	113	1981	10	10	8.1	242	9.4	0.349	30	180												3333
LLSarc1713	1713	LL	LLSar	GardaVR	GardaSalo1725b	65	113	1982	3	10	8.1	242	9.4	0.349	30	180												8.3325				1377.64
LLSarc1714	1714	LL	LLSar	GardaVR	GardaSalo1725b	65	113	1982	5	10	8.1	242	9.4	0.349	30	180																4466.22
LLSarc1715	1715	LL	LLSar	GardaVR	GardaSalo1725b	65	113	1982	7	10	8.1	242	9.4	0.349	30	180																666.6
LLSarc1716	1716	LL	LLSar	GardaVR	GardaSalo1725b	65	113	1982	10	10	8.1	242	9.4	0.349	30	180												666.6				3488.54															333.3
LLSarc1717	1717	LL	LLSar	GardaVR	GardaSalo1725b	65	113	2007	4	10	8.1	242	9.4	0.349	30	180
LLSarc1718	1718	LL	LLSar	GardaVR	GardaSalo1730	65	113	2007	4	10	8.17	242	9.4	0.349	30	80
LLSarc1719	1719	LL	LLSar	GardaVR	GardaSalo175	65	113	2007	4	10	7.5	242	6	0.349	30	180
LLSarc1720	1720	LL	LLSar	GardaVR	GardaSalo1750	65	113	1970	11	7.8	7.94	242	9.4	0.349	30	19.8												10				254
LLSarc1721	1721	LL	LLSar	GardaVR	GardaSalo1750	65	113	1982	5	7.8	7.94	242	9.4	0.349	30	19.8												999.9
LLSarc1722	1722	LL	LLSar	GardaVR	GardaSalo1775	65	113	1970	11	8.4	7.8	242	9.4	0.349	30	19.8												10				48
LLSarc1723	1723	LL	LLSar	GardaVR	GardaSalo179	65	113	1982	5	18	7.5	242	9.4	0.349	30	95							333.3
LLSarc1724	1724	LL	LLSar	GardaVR	GardaSalo17b15a	65	113	1982	7	10	0	242	9.4	0.349	30	0
LLSarc1725	1725	LL	LLSar	GardaVR	GardaSalo17b15b	65	113	1982	7	15	0	242	9.4	0.349	30	0
LLSarc1726	1726	LL	LLSar	GardaVR	GardaSalo17PtaCornob	65	113	1982	5	10	0	242	9.4	0.349	30	0																															555.5
LLSarc1727	1727	LL	LLSar	GardaVR	GardaSalo17PtaCornob	65	113	2007	4	10	0	242	9.4	0.349	30	0
LLSarc1728	1728	LL	LLSar	GardaVR	GardaSalo17PtaCornob	65	113	2007	5	10	0	242	9.4	0.349	30	0
LLSarc1729	1729	LL	LLSar	GardaVR	GardaSalo17Zanardelli	65	122	1982	5	17	8.1	242	7.6	0.349	30	19.8																															333.3
LLSarc1730	1730	LL	LLSar	GardaVR	GardaSalo18lit	65	113	2004	6	9	0	242	9.4	0.349	30	0												3	121.5					1								4					1
LLSarc1731	1731	LL	LLSar	GardaVR	GardaSalo18lit	65	113	2004	7	9	0	242	9.4	0.349	30	0	1												37			14										4	14				11
LLSarc1732	1732	LL	LLSar	GardaVR	GardaSalo18lit	65	113	2004	11	9	0	242	9.4	0.349	30	0
LLSarc1733	1733	LL	LLSar	GardaVR	GardaSalo18lit	65	113	2007	4	9	0	242	9.4	0.349	30	0																										11.111
LLSarc1734	1734	LL	LLSar	GardaVR	GardaSalo18lit	65	113	2011	4	9	0	242	9.4	0.349	30	0
LLSarc1735	1735	LL	LLSar	GardaVR	GardaSalo18lit	65	113	2011	7	9	0	242	9.4	0.349	30	0																11.11															11.11
LLSarc1736	1736	LL	LLSar	GardaVR	GardaSaloPtaCorno17	65	97	1981	10	14	8.1	242	9.3	0.349	30	2							555.5					822.14				822.14															22.22
LLSarc1737	1737	LL	LLSar	GardaVR	GardaSaloPtaCorno17	65	97	1982	3	14	8.1	242	9.3	0.349	30	2												266.64				266.64
LLSarc1738	1738	LL	LLSar	GardaVR	GardaSaloPtaCorno17	65	97	1982	5	14	8.1	242	9.3	0.349	30	2							22.22																			155.54					392.553
LLSarc1739	1739	LL	LLSar	GardaVR	GardaSaloPtaCorno17	65	97	1982	6	14	8.1	242	9.3	0.349	30	2
LLSarc1740	1740	LL	LLSar	GardaVR	GardaSaloPtaCorno17	65	97	1982	7	14	8.1	242	9.3	0.349	30	2																17.31										327.745						177.76
LLSarc1741	1741	LL	LLSar	GardaVR	GardaSaloPtaCorno17	65	97	1982	10	14	8.1	242	9.3	0.349	30	2							125.913									6799.32										88.88					322.19
LLSarc1742	1742	LL	LLSar	GardaVR	GardaSaloPtaCorno17	65	97	1999	2	14	8.1	242	9.3	0.349	30	2
LLSarc1743	1743	LL	LLSar	GardaVR	GardaSaloPtaCorno17	65	97	2004	3	14	8.1	242	9.3	0.349	30	2
LLSarc1744	1744	LL	LLSar	GardaVR	GardaSaloPtaCorno17	65	97	2004	6	14	8.1	242	9.3	0.349	30	2												3	121.5					1													1
LLSarc1745	1745	LL	LLSar	GardaVR	GardaSaloPtaCorno17	65	97	2004	7	14	8.1	242	9.3	0.349	30	2	1															14											14				11
LLSarc1746	1746	LL	LLSar	GardaVR	GardaSaloPtaCorno17	65	97	2004	11	14	8.1	242	9.3	0.349	30	2
LLSarc1747	1747	LL	LLSar	GardaVR	GardaSaloPtaCorno17	65	97	2007	4	14	8.1	242	9.3	0.349	30	2
LLSarc1748	1748	LL	LLSar	GardaVR	GardaSaloTavine17b05a	65	113	2008	4	15	0	242	9.4	0.349	30	0
LLSarc1749	1749	LL	LLSar	GardaVR	GardaSVigilio33	65	112	1970	11	10	7.8	242	9.3	0.349	30	19.8																50
LLSarc1750	1750	LL	LLSar	GardaVR	GardaSVigilio33	65	112	2003	7	10	7.8	242	9.3	0.349	30	19.8
LLSarc1751	1751	LL	LLSar	GardaVR	GardaSVigilio33	65	112	2003	8	10	7.8	242	9.3	0.349	30	19.8																5															4
LLSarc1752	1752	LL	LLSar	GardaVR	GardaSVigilio33	65	112	2003	9	10	7.8	242	9.3	0.349	30	19.8																1
LLSarc1753	1753	LL	LLSar	GardaVR	GardaSVigilio33	65	112	2004	3	10	7.8	242	9.3	0.349	30	19.8
LLSarc1754	1754	LL	LLSar	GardaVR	GardaSVigilio33	65	112	2004	7	10	7.8	242	9.3	0.349	30	19.8
LLSarc1755	1755	LL	LLSar	GardaVR	GardaSVigilio33	65	112	2010	10	10	7.8	242	9.3	0.349	30	19.8
LLSarc1756	1756	LL	LLSar	GardaVR	GardaTavine15lit	65	113	2007	4	8	0	242	9.4	0.349	30	0
LLSwed1757	1757	LL	LLSwe	Innaren	09_Innaren	176		1949	3	0	0	0	0	0	7	0
LLSwed1758	1758	LL	LLSwe	Innaren	09_Innaren	176		1966	0	0	0	0	0	0	7	0
LLSwed1759	1759	LL	LLSwe	Innaren	09_Innaren	176		1966	7	0	0	0	0	0	7	0	1
LLSwed1760	1760	LL	LLSwe	Innaren	09_Innaren	176		1967	0	0	0	0	0	0	7	0
LLSwed1761	1761	LL	LLSwe	Innaren	SwedenSouthA416	180	0	1949	3	0	0	0	0	0	0	0
LLSwed1762	1762	LL	LLSwe	Malaren	R115	180	0	1949	0	0	0	0	0	0	0	0
LLSwed1763	1763	LL	LLSwe	Malaren	SwedenSouthB004	180	0	1949	3	0	0	0	0	0	0	0
LLSwed1764	1764	LL	LLSwe	Malaren	SwedenSouthB094	180	0	1949	3	0	0	0	0	0	0	0
LLSwed1765	1765	LL	LLSwe	Malaren	SwedenSouthB1472	180	0	1949	3	0	0	0	0	0	0	0
LLSwed1766	1766	LL	LLSwe	Malaren	SwedenSouthB150	180	0	1949	3	0	0	0	0	0	0	0
LLSwed1767	1767	LL	LLSwe	Malaren	SwedenSouthB169	180	0	1949	3	0	0	0	0	0	0	0
LLSwed1768	1768	LL	LLSwe	Sweden	06_Siljan	30		1949	3	0	0	0	0	0	8	0
LLSwed1769	1769	LL	LLSwe	Sweden	Ror25554	180	0	1949	0	0	0	0	0	0	0	0
LLSwed1770	1770	LL	LLSwe	Vänern	08_Vanern	44.4		1949	3	0	0	0	0	0	8	0
LLSwed1771	1771	LL	LLSwe	Vattern	07_Vattern	89		1949	3	0	0	0	0	0	6	0
LLSwed1772	1772	LL	LLSwe	Vattern	SwedenSouthA389	89	0	1951	10	0	0	0	0	0	0	0
LLSwed1773	1773	LL	LLSwe	Vattern	SwedenSouthA3891	89	0	1951	10	0	0	0	0	0	0	0
LLSwed1774	1774	LL	LLSwe	Vattern	SwedenSouthA401	89	0	1950	3	0	0	0	0	0	0	0
LLSwed1775	1775	LL	LLSwe	Vattern	SwedenSouthA401	89	0	1952	4	0	0	0	0	0	0	0
LLSwed1776	1776	LL	LLSwe	Vattern	SwedenSouthA410	89	0	1955	5	0	0	0	0	0	0	0
LLSwed1777	1777	LL	LLSwe	Vattern	SwedenSouthA417	180	0	1949	5	0	0	0	0	0	0	0
LLSwed1778	1778	LL	LLSwe	Vattern	SwedenSouthA421	180	0	1949	5	0	0	0	0	0	0	0
LLSwed1779	1779	LL	LLSwe	Vattern	SwedenSouthA4211	180	0	1949	5	0	0	0	0	0	0	0
LLSwed1780	1780	LL	LLSwe	Vattern	SwedenSouthB0682	89	0	1946	8	0	0	0	0	0	0	0
LLSwed1781	1781	LL	LLSwe	Vattern	SwedenSouthB0682	89	0	1952	4	0	0	0	0	0	0	0
LLSwed1782	1782	LL	LLSwe	Vattern	SwedenSouthB45	180	180	1949	3	0	0	0	0	0	0	0
LLSwed1783	1783	LL	LLSwe	Vattern	SwedenSouthBBadet20	301	0	2004	5	0	0	0	0	0	0	0
LLSwed1784	1784	LL	LLSwe	Vattern	SwedenSouthBBadet20	301	0	2004	7	0	0	0	0	0	0	0
LLSwit1785	1785	LL	LLSwi	Leman	Leman	372	179	2003	0	0	0	0	15.3	0	39.6	0											1							1
LLSwit1786	1786	LL	LLSwi	Leman	Leman	372	179	2003	3	0	0	0	15.3	0	39.6	0	1	1					1					1	1		1	1			1	1						1	1			1	1	1
LLSwit1787	1787	LL	LLSwi	Leman	Leman001	372		2006	5	0	0	0	0	0	0	0
LLSwit1788	1788	LL	LLSwi	Leman	Leman002	372		2006	5	0	0	0	0	0	0	0
LLSwit1789	1789	LL	LLSwi	Leman	Leman003	372		2006	9	0	0	0	0	0	0	0
LLSwit1790	1790	LL	LLSwi	Leman	Leman01	372		2005	5	0	0	0	0	0	0	0
LLSwit1791	1791	LL	LLSwi	Leman	Leman01	372		2005	6	0	0	0	0	0	0	0
LLSwit1792	1792	LL	LLSwi	Leman	Leman011	372		2006	6	0	0	0	0	0	0	0
LLSwit1793	1793	LL	LLSwi	Leman	Leman015	372		2006	9	0	0	0	0	0	0	0
LLSwit1794	1794	LL	LLSwi	Leman	Leman016	372		2006	6	0	0	0	0	0	0	0
LLSwit1795	1795	LL	LLSwi	Leman	Leman017	372		2006	6	0	0	0	0	0	0	0
LLSwit1796	1796	LL	LLSwi	Leman	Leman018	372		2006	6	0	0	0	0	0	0	0
LLSwit1797	1797	LL	LLSwi	Leman	Leman019	372		2006	6	0	0	0	0	0	0	0
LLSwit1798	1798	LL	LLSwi	Leman	Leman02	372		1998	11	0	0	0	0	0	0	0
LLSwit1799	1799	LL	LLSwi	Leman	Leman02	372		2005	5	0	0	0	0	0	0	0
LLSwit1800	1800	LL	LLSwi	Leman	Leman02	372		2005	6	0	0	0	0	0	0	0
LLSwit1801	1801	LL	LLSwi	Leman	Leman020	372		2006	6	0	0	0	0	0	0	0
LLSwit1802	1802	LL	LLSwi	Leman	Leman021	372		2006	6	0	0	0	0	0	0	0
LLSwit1803	1803	LL	LLSwi	Leman	Leman022	372		2006	6	0	0	0	0	0	0	0
LLSwit1804	1804	LL	LLSwi	Leman	Leman023	372		2006	6	0	0	0	0	0	0	0
LLSwit1805	1805	LL	LLSwi	Leman	Leman024	372		2006	6	0	0	0	0	0	0	0
LLSwit1806	1806	LL	LLSwi	Leman	Leman025	372		2006	6	0	0	0	0	0	0	0
LLSwit1807	1807	LL	LLSwi	Leman	Leman026	372		2006	6	0	0	0	0	0	0	0
LLSwit1808	1808	LL	LLSwi	Leman	Leman03	372		2005	5	0	0	0	0	0	0	0
LLSwit1809	1809	LL	LLSwi	Leman	Leman03	372		2005	6	0	0	0	0	0	0	0
LLSwit1810	1810	LL	LLSwi	Leman	Leman04	372		2005	5	0	0	0	0	0	0	0
LLSwit1811	1811	LL	LLSwi	Leman	Leman05	372		2005	5	0	0	0	0	0	0	0
LLSwit1812	1812	LL	LLSwi	Leman	Leman06	372		2005	5	0	0	0	0	0	0	0
LLSwit1813	1813	LL	LLSwi	Leman	Leman06	372		2005	6	0	0	0	0	0	0	0
LLSwit1814	1814	LL	LLSwi	Leman	Leman07	372		2005	5	0	0	0	0	0	0	0
LLSwit1815	1815	LL	LLSwi	Leman	Leman07	372		2005	6	0	0	0	0	0	0	0
LLSwit1816	1816	LL	LLSwi	Leman	Leman08	372		1998	11	0	0	0	0	0	0	0
LLSwit1817	1817	LL	LLSwi	Leman	Leman08	372		2005	6	0	0	0	0	0	0	0
LLSwit1818	1818	LL	LLSwi	Leman	Leman09	372		2005	5	0	0	0	0	0	0	0
LLSwit1819	1819	LL	LLSwi	Leman	Leman10	372	179	1998	11	0	0	0	15.3	0	39.6	0
LLSwit1820	1820	LL	LLSwi	Leman	Leman10	372	179	2005	5	0	0	0	15.3	0	39.6	0
LLSwit1821	1821	LL	LLSwi	Leman	Leman10	372	179	2005	6	0	0	0	15.3	0	39.6	0
LLSwit1822	1822	LL	LLSwi	Leman	Leman101	372	179	2003	11	0	0	0	0	0	0	0												625
LLSwit1823	1823	LL	LLSwi	Leman	Leman102	372	179	2003	11	0	0	0	0	0	0	0
LLSwit1824	1824	LL	LLSwi	Leman	Leman104	372	179	2003	11	0	0	0	0	0	0	0
LLSwit1825	1825	LL	LLSwi	Leman	Leman105	372	179	2003	11	0	0	0	0	0	0	0
LLSwit1826	1826	LL	LLSwi	Leman	Leman109	372	179	2003	11	0	0	0	0	0	0	0
LLSwit1827	1827	LL	LLSwi	Leman	Leman11	372	179	2005	6	0	0	0	15.3	0	0	0
LLSwit1828	1828	LL	LLSwi	Leman	Leman110	372	179	2003	11	0	0	0	0	0	0	0												1875
LLSwit1829	1829	LL	LLSwi	Leman	Leman114	372	179	2003	11	0	0	0	0	0	0	0
LLSwit1830	1830	LL	LLSwi	Leman	Leman117	372	179	2003	11	0	0	0	0	0	0	0
LLSwit1831	1831	LL	LLSwi	Leman	Leman12	372		2005	6	0	0	0	0	0	0	0
LLSwit1832	1832	LL	LLSwi	Leman	Leman121	372	179	2003	11	0	0	0	0	0	0	0
LLSwit1833	1833	LL	LLSwi	Leman	Leman123	372	179	2003	11	0	0	0	0	0	0	0
LLSwit1834	1834	LL	LLSwi	Leman	Leman125	372	179	2003	11	0	0	0	0	0	0	0
LLSwit1835	1835	LL	LLSwi	Leman	Leman126	372	179	2003	11	0	0	0	0	0	0	0												625
LLSwit1836	1836	LL	LLSwi	Leman	Leman132	372	179	2003	11	0	0	0	0	0	0	0
LLSwit1837	1837	LL	LLSwi	Leman	Leman133	372	179	2003	11	0	0	0	0	0	0	0
LLSwit1838	1838	LL	LLSwi	Leman	Leman134	372	179	2003	11	0	0	0	0	0	0	0												625
LLSwit1839	1839	LL	LLSwi	Leman	Leman14	372		2005	5	0	0	0	0	0	0	0
LLSwit1840	1840	LL	LLSwi	Leman	Leman143	372	179	2003	11	0	0	0	0	0	0	0
LLSwit1841	1841	LL	LLSwi	Leman	Leman15	372	179	2005	5	0	0	0	0	0	29.4	0
LLSwit1842	1842	LL	LLSwi	Leman	Leman15	372	179	2005	6	0	0	0	0	0	29.4	0
LLSwit1843	1843	LL	LLSwi	Leman	Leman150	372	179	2003	11	0	0	0	0	0	0	0
LLSwit1844	1844	LL	LLSwi	Leman	Leman151	372	179	2003	11	0	0	0	0	0	0	0
LLSwit1845	1845	LL	LLSwi	Leman	Leman152	372	179	2003	11	0	0	0	0	0	0	0
LLSwit1846	1846	LL	LLSwi	Leman	Leman153	372	179	2003	11	0	0	0	0	0	0	0
LLSwit1847	1847	LL	LLSwi	Leman	Leman16	372		1998	11	0	0	0	0	0	0	0
LLSwit1848	1848	LL	LLSwi	Leman	Leman162	372	179	2003	11	0	0	0	0	0	0	0
LLSwit1849	1849	LL	LLSwi	Leman	Leman163	372	179	2003	11	0	0	0	0	0	0	0
LLSwit1850	1850	LL	LLSwi	Leman	Leman169	372	179	2003	11	0	0	0	0	0	0	0
LLSwit1851	1851	LL	LLSwi	Leman	Leman173	372	179	2003	11	0	0	0	0	0	0	0
LLSwit1852	1852	LL	LLSwi	Leman	Leman174	372	179	2003	11	0	0	0	0	0	0	0
LLSwit1853	1853	LL	LLSwi	Leman	Leman175	372	179	2003	11	0	0	0	0	0	0	0
LLSwit1854	1854	LL	LLSwi	Leman	Leman18	372		1998	11	0	0	0	0	0	0	0
LLSwit1855	1855	LL	LLSwi	Leman	Leman182	372	179	2003	11	0	0	0	0	0	0	0
LLSwit1856	1856	LL	LLSwi	Leman	Leman183	372	179	2003	11	0	0	0	0	0	0	0
LLSwit1857	1857	LL	LLSwi	Leman	Leman185	372	179	2003	11	0	0	0	0	0	0	0
LLSwit1858	1858	LL	LLSwi	Leman	Leman186	372	179	2003	11	0	0	0	0	0	0	0												625
LLSwit1859	1859	LL	LLSwi	Leman	Leman195	372	179	2003	11	0	0	0	0	0	0	0
LLSwit1860	1860	LL	LLSwi	Leman	Leman22	372	179	1998	11	0	0	0	15.3	0	0	0
LLSwit1861	1861	LL	LLSwi	Leman	Leman24	372		1998	11	0	0	0	0	0	0	0
LLSwit1862	1862	LL	LLSwi	Leman	Leman26	372		1998	11	0	0	0	0	0	0	0
LLSwit1863	1863	LL	LLSwi	Leman	Leman39	372		1998	11	0	0	0	0	0	0	0
LLSwit1864	1864	LL	LLSwi	Leman	Leman41	372		1998	11	0	0	0	0	0	0	0
LLSwit1865	1865	LL	LLSwi	Leman	Leman44	372	179	2003	11	0	0	0	15.3	0	0	0
LLSwit1866	1866	LL	LLSwi	Leman	Leman45	372	179	2003	11	0	0	0	0	0	0	0
LLSwit1867	1867	LL	LLSwi	Leman	Leman46	372	179	2003	11	0	0	0	0	0	0	0
LLSwit1868	1868	LL	LLSwi	Leman	Leman47	372	179	2003	11	0	0	0	0	0	0	0												625
LLSwit1869	1869	LL	LLSwi	Leman	Leman50	372	179	2003	11	0	0	0	0	0	0	0												625
LLSwit1870	1870	LL	LLSwi	Leman	Leman51	372	179	2003	11	0	0	0	0	0	0	0												1250
LLSwit1871	1871	LL	LLSwi	Leman	Leman52	372	179	2003	11	0	0	0	0	0	0	0
LLSwit1872	1872	LL	LLSwi	Leman	Leman53	372	179	2003	11	0	0	0	0	0	0	0
LLSwit1873	1873	LL	LLSwi	Leman	Leman54	372	179	1998	11	0	0	0	0	0	0	0
LLSwit1874	1874	LL	LLSwi	Leman	Leman54	372	179	2003	11	0	0	0	0	0	0	0
LLSwit1875	1875	LL	LLSwi	Leman	Leman55	372	179	2003	11	0	0	0	0	0	0	0
LLSwit1876	1876	LL	LLSwi	Leman	Leman56	372	179	2003	11	0	0	0	0	0	0	0												625
LLSwit1877	1877	LL	LLSwi	Leman	Leman58	372	179	2003	11	0	0	0	0	0	0	0
LLSwit1878	1878	LL	LLSwi	Leman	Leman59	372	179	1998	11	0	0	0	0	0	0	0
LLSwit1879	1879	LL	LLSwi	Leman	Leman59	372	179	2003	11	0	0	0	0	0	0	0
LLSwit1880	1880	LL	LLSwi	Leman	Leman61	372	179	1998	11	0	0	0	0	0	0	0
LLSwit1881	1881	LL	LLSwi	Leman	Leman61	372	179	2003	11	0	0	0	0	0	0	0
LLSwit1882	1882	LL	LLSwi	Leman	Leman62	372	179	2003	11	0	0	0	0	0	0	0
LLSwit1883	1883	LL	LLSwi	Leman	Leman65	372	179	2003	11	0	0	0	0	0	27.7	0												5000
LLSwit1884	1884	LL	LLSwi	Leman	Leman66	372	179	2003	11	0	0	0	15.3	0	0	0
LLSwit1885	1885	LL	LLSwi	Leman	Leman67	372	179	2003	11	0	0	0	0	0	0	0
LLSwit1886	1886	LL	LLSwi	Leman	Leman68	372	179	2003	11	0	0	0	0	0	0	0
LLSwit1887	1887	LL	LLSwi	Leman	Leman69	372	179	2003	11	0	0	0	0	0	0	0
LLSwit1888	1888	LL	LLSwi	Leman	Leman70	372	179	1998	11	0	0	0	0	0	0	0
LLSwit1889	1889	LL	LLSwi	Leman	Leman70	372	179	2003	11	0	0	0	0	0	0	0
LLSwit1890	1890	LL	LLSwi	Leman	Leman72	372	179	2003	11	0	0	0	0	0	0	0
LLSwit1891	1891	LL	LLSwi	Leman	Leman73	372	179	2003	11	0	0	0	0	0	0	0
LLSwit1892	1892	LL	LLSwi	Leman	Leman74	372	179	2003	11	0	0	0	0	0	0	0
LLSwit1893	1893	LL	LLSwi	Leman	Leman75	372	179	2003	11	0	0	0	0	0	0	0
LLSwit1894	1894	LL	LLSwi	Leman	Leman78	372	179	2003	11	0	0	0	0	0	0	0
LLSwit1895	1895	LL	LLSwi	Leman	Leman80	372	179	2003	11	0	0	0	0	0	0	0
LLSwit1896	1896	LL	LLSwi	Leman	Leman82	372	179	2003	11	0	0	0	0	0	0	0												1875
LLSwit1897	1897	LL	LLSwi	Leman	Leman84	372	179	1998	11	0	0	0	0	0	0	0
LLSwit1898	1898	LL	LLSwi	Leman	Leman84	372	179	2003	11	0	0	0	0	0	0	0
LLSwit1899	1899	LL	LLSwi	Leman	Leman86	372	179	2003	11	0	0	0	0	0	0	0
LLSwit1900	1900	LL	LLSwi	Leman	Leman87	372	179	2003	11	0	0	0	0	0	0	0
LLSwit1901	1901	LL	LLSwi	Leman	Leman90	372	179	2003	11	0	0	0	0	0	0	0
LLSwit1902	1902	LL	LLSwi	Leman	Leman91	372	179	2003	11	0	0	0	0	0	0	0
LLSwit1903	1903	LL	LLSwi	Leman	Leman93	372	179	2003	11	0	0	0	0	0	0	0
LLSwit1904	1904	LL	LLSwi	Leman	Leman94	372	179	2003	11	0	0	0	0	0	0	0
LLSwit1905	1905	LL	LLSwi	Leman	Leman98	372	179	2003	11	0	0	0	0	0	0	0
LLSwit1906	1906	LL	LLSwi	Neuchatel	Neuchatel	429	44	1984	3	0	0	0	0	0	18	0
LLSwit1907	1907	LL	LLSwi	Neuchatel	Neuchatel	429	44	1992	3	0	0	0	0	0	18	0
LLSwit1908	1908	LL	LLSwi	Neuchatel	Neuchatel	429	44	1997	3	0	0	0	0	0	18	0
LLSwit1909	1909	LL	LLSwi	Neuchatel	Neuchatel	429	44	2000	3	0	0	0	0	0	18	0
LLSwit1910	1910	LL	LLSwi	Neuchatel	Neuchatel	429	44	2002	3	0	0	0	0	0	18	0
LLSwit1911	1911	LL	LLSwi	Neuchatel	Neuchatel01	429		2002	4	0	0	0	0	0	0	0
LLSwit1912	1912	LL	LLSwi	Neuchatel	Neuchatel01	429		2002	5	0	0	0	0	0	0	0
LLSwit1913	1913	LL	LLSwi	Neuchatel	Neuchatel02	429		2002	4	0	0	0	0	0	0	0
LLSwit1914	1914	LL	LLSwi	Neuchatel	Neuchatel02	429		2002	5	0	0	0	0	0	0	0
LLSwit1915	1915	LL	LLSwi	Neuchatel	Neuchatel03	429		2000	5	0	0	0	0	0	0	0
LLSwit1916	1916	LL	LLSwi	Neuchatel	Neuchatel03	429		2002	5	0	0	0	0	0	0	0
LLSwit1917	1917	LL	LLSwi	Neuchatel	Neuchatel04	429		2000	5	0	0	0	0	0	0	0
LLSwit1918	1918	LL	LLSwi	Neuchatel	Neuchatel04	429		2002	4	0	0	0	0	0	0	0
LLSwit1919	1919	LL	LLSwi	Neuchatel	Neuchatel04	429		2002	5	0	0	0	0	0	0	0
LLSwit1920	1920	LL	LLSwi	Neuchatel	Neuchatel05	429		2000	5	0	0	0	0	0	0	0
LLSwit1921	1921	LL	LLSwi	Neuchatel	Neuchatel05	429		2002	5	0	0	0	0	0	0	0
LLSwit1922	1922	LL	LLSwi	Neuchatel	Neuchatel06	429		1994	6	0	0	0	0	0	0	0
LLSwit1923	1923	LL	LLSwi	Neuchatel	Neuchatel06	429		2000	5	0	0	0	0	0	0	0
LLSwit1924	1924	LL	LLSwi	Neuchatel	Neuchatel06	429		2002	4	0	0	0	0	0	0	0
LLSwit1925	1925	LL	LLSwi	Neuchatel	Neuchatel06	429		2002	5	0	0	0	0	0	0	0
LLSwit1926	1926	LL	LLSwi	Neuchatel	Neuchatel07	429		2000	5	0	0	0	0	0	0	0
LLSwit1927	1927	LL	LLSwi	Neuchatel	Neuchatel07	429		2002	4	0	0	0	0	0	0	0
LLSwit1928	1928	LL	LLSwi	Neuchatel	Neuchatel07	429		2002	5	0	0	0	0	0	0	0
LLSwit1929	1929	LL	LLSwi	Neuchatel	Neuchatel08	429		2000	4	0	0	0	0	0	0	0
LLSwit1930	1930	LL	LLSwi	Neuchatel	Neuchatel08	429		2000	5	0	0	0	0	0	0	0
LLSwit1931	1931	LL	LLSwi	Neuchatel	Neuchatel08	429		2002	4	0	0	0	0	0	0	0
LLSwit1932	1932	LL	LLSwi	Neuchatel	Neuchatel08	429		2002	5	0	0	0	0	0	0	0
LLSwit1933	1933	LL	LLSwi	Neuchatel	Neuchatel09	429		2000	4	0	0	0	0	0	0	0
LLSwit1934	1934	LL	LLSwi	Neuchatel	Neuchatel09	429		2000	5	0	0	0	0	0	0	0
LLSwit1935	1935	LL	LLSwi	Neuchatel	Neuchatel09	429		2002	4	0	0	0	0	0	0	0
LLSwit1936	1936	LL	LLSwi	Neuchatel	Neuchatel09	429		2002	5	0	0	0	0	0	0	0
LLSwit1937	1937	LL	LLSwi	Neuchatel	Neuchatel1	429		2007	4	0	0	0	0	0	0	0
LLSwit1938	1938	LL	LLSwi	Neuchatel	Neuchatel10	429	44	2000	4	0	0	0	0	0	0	0
LLSwit1939	1939	LL	LLSwi	Neuchatel	Neuchatel10	429	44	2000	5	0	0	0	0	0	0	0
LLSwit1940	1940	LL	LLSwi	Neuchatel	Neuchatel10	429	44	2002	4	0	0	0	0	0	0	0
LLSwit1941	1941	LL	LLSwi	Neuchatel	Neuchatel10	429	44	2002	5	0	0	0	0	0	0	0
LLSwit1942	1942	LL	LLSwi	Neuchatel	Neuchatel10	429	44	2007	4	0	0	0	0	0	0	0
LLSwit1943	1943	LL	LLSwi	Neuchatel	Neuchatel11	429	44	2000	4	0	0	0	0	0	0	0
LLSwit1944	1944	LL	LLSwi	Neuchatel	Neuchatel11	429	44	2000	5	0	0	0	0	0	0	0
LLSwit1945	1945	LL	LLSwi	Neuchatel	Neuchatel11	429	44	2002	4	0	0	0	0	0	0	0
LLSwit1946	1946	LL	LLSwi	Neuchatel	Neuchatel11	429	44	2002	5	0	0	0	0	0	0	0
LLSwit1947	1947	LL	LLSwi	Neuchatel	Neuchatel11	429	44	2007	4	0	0	0	0	0	0	0
LLSwit1948	1948	LL	LLSwi	Neuchatel	Neuchatel12	429	44	2000	4	0	0	0	0	0	0	0
LLSwit1949	1949	LL	LLSwi	Neuchatel	Neuchatel12	429	44	2000	5	0	0	0	0	0	0	0
LLSwit1950	1950	LL	LLSwi	Neuchatel	Neuchatel12	429	44	2002	5	0	0	0	0	0	0	0
LLSwit1951	1951	LL	LLSwi	Neuchatel	Neuchatel12	429	44	2007	4	0	0	0	0	0	0	0
LLSwit1952	1952	LL	LLSwi	Neuchatel	Neuchatel13	429	44	2000	4	0	0	0	0	0	0	0
LLSwit1953	1953	LL	LLSwi	Neuchatel	Neuchatel13	429	44	2000	5	0	0	0	0	0	0	0
LLSwit1954	1954	LL	LLSwi	Neuchatel	Neuchatel13	429	44	2002	4	0	0	0	0	0	0	0
LLSwit1955	1955	LL	LLSwi	Neuchatel	Neuchatel13	429	44	2002	5	0	0	0	0	0	0	0
LLSwit1956	1956	LL	LLSwi	Neuchatel	Neuchatel13	429	44	2007	4	0	0	0	0	0	0	0
LLSwit1957	1957	LL	LLSwi	Neuchatel	Neuchatel14	429	44	1994	6	0	0	0	0	0	0	0
LLSwit1958	1958	LL	LLSwi	Neuchatel	Neuchatel14	429	44	2000	5	0	0	0	0	0	0	0
LLSwit1959	1959	LL	LLSwi	Neuchatel	Neuchatel14	429	44	2002	4	0	0	0	0	0	0	0
LLSwit1960	1960	LL	LLSwi	Neuchatel	Neuchatel14	429	44	2002	5	0	0	0	0	0	0	0
LLSwit1961	1961	LL	LLSwi	Neuchatel	Neuchatel15	429	44	1994	6	0	0	0	0	0	0	0
LLSwit1962	1962	LL	LLSwi	Neuchatel	Neuchatel15	429	44	2000	5	0	0	0	0	0	0	0
LLSwit1963	1963	LL	LLSwi	Neuchatel	Neuchatel15	429	44	2002	4	0	0	0	0	0	0	0
LLSwit1964	1964	LL	LLSwi	Neuchatel	Neuchatel15	429	44	2002	5	0	0	0	0	0	0	0
LLSwit1965	1965	LL	LLSwi	Neuchatel	Neuchatel16	429	44	2000	5	0	0	0	0	0	0	0
LLSwit1966	1966	LL	LLSwi	Neuchatel	Neuchatel16	429	44	2002	4	0	0	0	0	0	0	0
LLSwit1967	1967	LL	LLSwi	Neuchatel	Neuchatel16	429	44	2002	5	0	0	0	0	0	0	0
LLSwit1968	1968	LL	LLSwi	Neuchatel	Neuchatel17	429	44	2000	4	0	0	0	0	0	0	0
LLSwit1969	1969	LL	LLSwi	Neuchatel	Neuchatel17	429	44	2000	5	0	0	0	0	0	0	0
LLSwit1970	1970	LL	LLSwi	Neuchatel	Neuchatel17	429	44	2002	4	0	0	0	0	0	0	0
LLSwit1971	1971	LL	LLSwi	Neuchatel	Neuchatel17	429	44	2002	5	0	0	0	0	0	0	0
LLSwit1972	1972	LL	LLSwi	Neuchatel	Neuchatel18	429	44	2000	5	0	0	0	0	0	0	0
LLSwit1973	1973	LL	LLSwi	Neuchatel	Neuchatel18	429	44	2002	4	0	0	0	0	0	0	0
LLSwit1974	1974	LL	LLSwi	Neuchatel	Neuchatel19	429	44	2000	5	0	0	0	0	0	0	0
LLSwit1975	1975	LL	LLSwi	Neuchatel	Neuchatel19	429	44	2002	5	0	0	0	0	0	0	0
LLSwit1976	1976	LL	LLSwi	Neuchatel	Neuchatel20	429	44	2000	5	0	0	0	0	0	0	0
LLSwit1977	1977	LL	LLSwi	Neuchatel	Neuchatel20	429	44	2002	4	0	0	0	0	0	0	0
LLSwit1978	1978	LL	LLSwi	Neuchatel	Neuchatel20	429	44	2002	5	0	0	0	0	0	0	0
LLSwit1979	1979	LL	LLSwi	Neuchatel	Neuchatel20	429	44	2007	4	0	0	0	0	0	0	0
LLSwit1980	1980	LL	LLSwi	Neuchatel	Neuchatel21	429	44	2000	4	0	0	0	0	0	0	0
LLSwit1981	1981	LL	LLSwi	Neuchatel	Neuchatel21	429	44	2000	5	0	0	0	0	0	0	0
LLSwit1982	1982	LL	LLSwi	Neuchatel	Neuchatel21	429	44	2002	4	0	0	0	0	0	0	0
LLSwit1983	1983	LL	LLSwi	Neuchatel	Neuchatel21	429	44	2002	5	0	0	0	0	0	0	0
LLSwit1984	1984	LL	LLSwi	Neuchatel	Neuchatel22	429	44	2000	4	0	0	0	0	0	0	0
LLSwit1985	1985	LL	LLSwi	Neuchatel	Neuchatel22	429	44	2000	5	0	0	0	0	0	0	0
LLSwit1986	1986	LL	LLSwi	Neuchatel	Neuchatel22	429	44	2002	5	0	0	0	0	0	0	0
LLSwit1987	1987	LL	LLSwi	Neuchatel	Neuchatel23	429	44	1994	6	0	0	0	0	0	0	0
LLSwit1988	1988	LL	LLSwi	Neuchatel	Neuchatel23	429	44	2000	4	0	0	0	0	0	0	0
LLSwit1989	1989	LL	LLSwi	Neuchatel	Neuchatel23	429	44	2000	5	0	0	0	0	0	0	0
LLSwit1990	1990	LL	LLSwi	Neuchatel	Neuchatel23	429	44	2002	4	0	0	0	0	0	0	0
LLSwit1991	1991	LL	LLSwi	Neuchatel	Neuchatel23	429	44	2002	5	0	0	0	0	0	0	0
LLSwit1992	1992	LL	LLSwi	Neuchatel	Neuchatel24	429	44	1994	6	0	0	0	0	0	0	0
LLSwit1993	1993	LL	LLSwi	Neuchatel	Neuchatel24	429	44	2000	4	0	0	0	0	0	0	0
LLSwit1994	1994	LL	LLSwi	Neuchatel	Neuchatel24	429	44	2000	5	0	0	0	0	0	0	0
LLSwit1995	1995	LL	LLSwi	Neuchatel	Neuchatel24	429	44	2002	4	0	0	0	0	0	0	0
LLSwit1996	1996	LL	LLSwi	Neuchatel	Neuchatel24	429	44	2002	5	0	0	0	0	0	0	0
LLSwit1997	1997	LL	LLSwi	Neuchatel	Neuchatel25	429	44	2000	4	0	0	0	0	0	0	0
LLSwit1998	1998	LL	LLSwi	Neuchatel	Neuchatel25	429	44	2000	5	0	0	0	0	0	0	0
LLSwit1999	1999	LL	LLSwi	Neuchatel	Neuchatel25	429	44	2002	4	0	0	0	0	0	0	0
[truncated: 7,128 more rows]
[truncated: 110 more columns]
